# Supplementary material for: Hydrogen spillover drives room temperature sensing on spark plasma sintered BaTiO3 with Pt electrodes
Source: Royal Society of Chemistry journal article supplement (doi:10.1039/d4ta02865a), 2024-01-01
Supplement: d4ta02865a1.pdf [file d4ta02865a1.pdf]

## Supporting Information

### **Hydrogen Spillover Drives Room Temperature Sensing on Spark Plasma Sintered BaTiO<sub>3</sub> with Pt Electrodes**

Jon G. Bell<sup>1</sup>, Shangxiong Huangfu<sup>1</sup>, Luca Artiglia<sup>2</sup>, Thomas Graule<sup>1</sup>, and Michael Stuer<sup>1</sup>

<sup>1</sup> High Performance Ceramics Laboratory, Department of Advanced Materials and Surfaces, Swiss Federal Laboratories for Materials Science and Technology, Dübendorf, Switzerland.

<sup>2</sup> Swiss Light Source, Paul Scherrer Institute, Villigen, Switzerland.

#### Contents

|       |                                                                                         |    |
|-------|-----------------------------------------------------------------------------------------|----|
| 1     | Experimental                                                                            | 3  |
| 1.1   | Material Synthesis and Characterisation                                                 | 3  |
| 1.1.1 | Powder Properties: Gas Adsorption and Surface Area                                      | 3  |
| 1.1.2 | Powder Properties: Laser Diffraction for Particle Size Measurements                     | 4  |
| 1.2   | Spark Plasma Sintering of BaTiO <sub>3</sub>                                            | 5  |
| 1.3   | Scanning Electron Microscopy (SEM)                                                      | 7  |
| 1.4   | Powder X-ray diffraction (PXRD)                                                         | 7  |
| 1.5   | Post-Synthetic Reduction and Oxidation Program to Incorporate Ionosorbed Oxygen Species | 8  |
| 1.6   | Total Resistance Increase During Oxidation                                              | 9  |
| 1.7   | Electrochemical Impedance Spectroscopy (EIS)                                            | 9  |
| 1.7.1 | Kramers Kronig Analysis                                                                 | 9  |
| 2     | Results and Discussion                                                                  | 11 |
| 2.1   | Scanning Electron Microscopy                                                            | 11 |
| 2.2   | Sintered Pellet Density and N <sub>2</sub> Surface Area Measurements                    | 11 |
| 2.3   | Powder X-Ray Diffraction (PXRD)                                                         | 12 |
| 2.4   | Controlled Oxidation                                                                    | 13 |
| 2.4.1 | Oxidation at 460 °C                                                                     | 13 |
| 2.4.2 | Oxidation at 470 °C                                                                     | 14 |
| 2.5   | Gas Sensing: Switching from Air to H <sub>2</sub> to Air at 22 °C                       | 14 |
| 2.5.1 | Sample oxidised at 460 °C                                                               | 14 |
| 2.6   | Electrochemical Impedance Spectroscopy Response in N <sub>2</sub> and O <sub>2</sub>    | 15 |
| 2.7   | Near Ambient Pressure X-Ray Photoelectron Spectroscopy (NAP-XPS)                        | 17 |
| 2.7.1 | Quality Assessment of XPS Peak Fitting                                                  | 18 |
| 2.7.2 | O 1s Photoemission Peak for Pt-BTO-470                                                  | 19 |
| 2.7.3 | C 1s Photoemission Peak for Pt-BTO-470                                                  | 22 |

|        |                                                                                                                 |    |
|--------|-----------------------------------------------------------------------------------------------------------------|----|
| 2.7.4  | Ti 2p Photoemission Peak for Pt-BTO-470.....                                                                    | 24 |
| 2.7.5  | Ba 4d Photoemission Peak for Pt-BTO-470.....                                                                    | 26 |
| 2.7.6  | Pt 4f Photoemission Peak for Pt-BTO-470.....                                                                    | 28 |
| 2.8    | Electrochemical Impedance Spectroscopy Studies.....                                                             | 30 |
| 2.8.1  | H <sub>2</sub> and D <sub>2</sub> Kinetic isotope Studies at 22 °C and 130 °C.....                              | 30 |
| 2.8.2  | AC Conductivity Analysis: Jonscher Analysis as a Function of H <sub>2</sub> Concentration and Temperature ..... | 31 |
| 2.8.3  | Langmuir Conductivity Model.....                                                                                | 39 |
| 2.8.4  | Charge Transport Mechanism from Jonscher Model S Parameter (S vs. T).....                                       | 40 |
| 2.8.5  | Capacitance Measurements and Colossal Relative Permittivity ( $\epsilon_r$ ) .....                              | 43 |
| 2.8.6  | Distribution of Relaxation Times Analysis (DRT).....                                                            | 45 |
| 2.8.7  | Activation Energies from Jonscher Analysis using $\sigma_{dc}$ Data.....                                        | 61 |
| 2.8.8  | Meyer-Neldel Effect for Total Conductivity from Jonscher $\sigma_{dc}$ Data .....                               | 64 |
| 2.8.9  | Grain Boundary Activation Energies from DRT Analysis.....                                                       | 65 |
| 2.8.10 | Meyer-Neldel Effect for Grain Boundary Regions from Distribution of Relaxation Times Analysis.....              | 65 |
| 3      | References .....                                                                                                | 67 |

# 1 Experimental

## 1.1 Material Synthesis and Characterisation

### 1.1.1 Powder Properties: Gas Adsorption and Surface Area

The N<sub>2</sub> surface areas of BaTiO<sub>3</sub> powders and sintered pellets were measured at -196 °C using a Micromeritics 2020 ASAP volumetric adsorption system. Approximately 2 grams of each sample type was placed into the sample tube and a displacer rod was added. The sample chamber was heated to 150 °C and evacuated to a pressure of 13 μbar over a 1-hour period. Following this, the samples were kept at 150 °C and degassed for 2 hours. After degassing, samples were cooled to room temperature and weighed to attain the dry weight. The sample tubes were attached to the instrument measuring ports, and isothermal measurements were performed using a Dewar filled with liquid nitrogen for adsorption at -196 °C. N<sub>2</sub> adsorption was performed on the degassed materials at -196 °C using a high-resolution isotherm up to a N<sub>2</sub> relative pressure (p/p<sup>0</sup>) equal to 0.98. Surface areas were calculated using the Brunauer-Emmett-Teller (BET) multilayer adsorption equation.

Table S 1. BaTiO<sub>3</sub> powder properties: Density, N<sub>2</sub> BET surface area and diameter, and laser diffraction D<sub>V50</sub> value.

| Sample                    | He pycnometry density (g cm <sup>-3</sup> ) | N <sub>2</sub> BET surface area (m <sup>2</sup> g <sup>-1</sup> ) | BET diameter (μm) | D <sub>V50</sub> (μm) | Aggregation factor |
|---------------------------|---------------------------------------------|-------------------------------------------------------------------|-------------------|-----------------------|--------------------|
| BaTiO <sub>3</sub> powder | 5.72                                        | 1.93 ± 0.15                                                       | 0.54 ± 0.04       | 0.60 ± 0.14           | 1.1                |

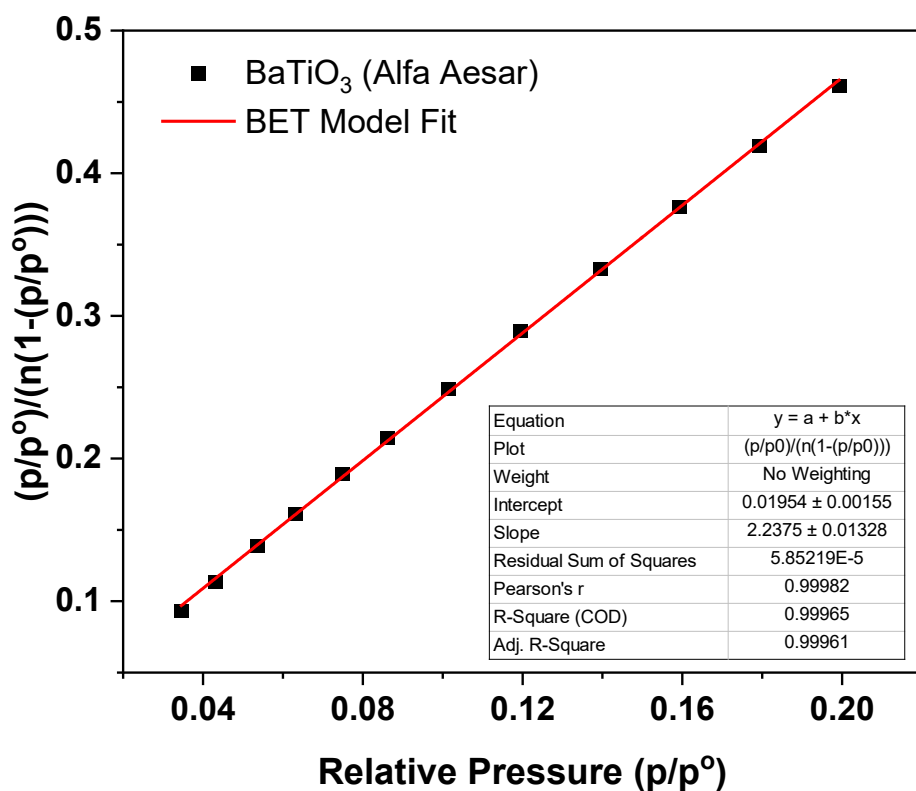

Figure S 1. BET plot for N<sub>2</sub> adsorption on BaTiO<sub>3</sub> as-received powder at -196 °C.

### 1.1.2 Powder Properties: Laser Diffraction for Particle Size Measurements

BaTiO<sub>3</sub> (0.4 grams) was mixed with 40 mL of ultrapure water. The suspension was sonicated for 15 minutes with an ultrasound tip. The particle size measurement was performed with a Beckman Coulter LS 13 320 laser diffraction particle size analyser. Particle size (µm) vs. the differential volume is shown in SI Figure 2.

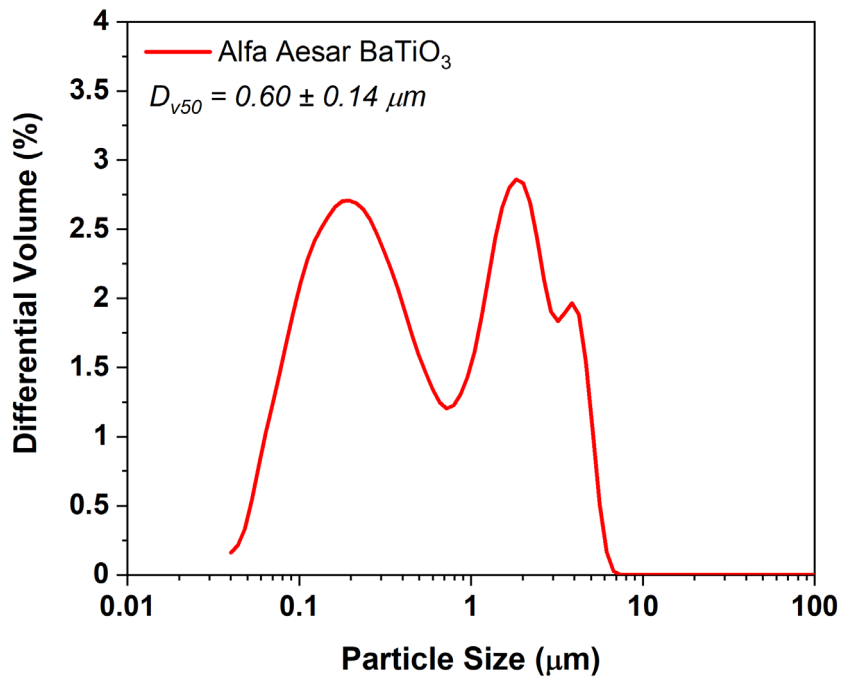

Figure S 2. Particle size laser diffraction measurement of as-received BaTiO<sub>3</sub> powder.

## 1.2 Spark Plasma Sintering of BaTiO<sub>3</sub>

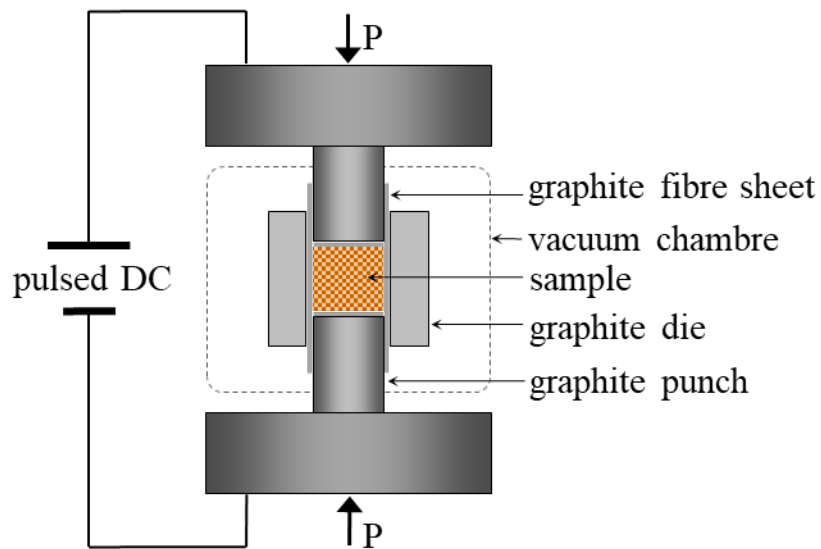

Figure S 3. Schematic diagram of the spark plasma sintering setup used in this study. Conditions used: heating rate – 100 °C min<sup>-1</sup>; sintering temperature – 1200 °C; Pressure - 50 MPa; pulse sequence 12:6.

(a)

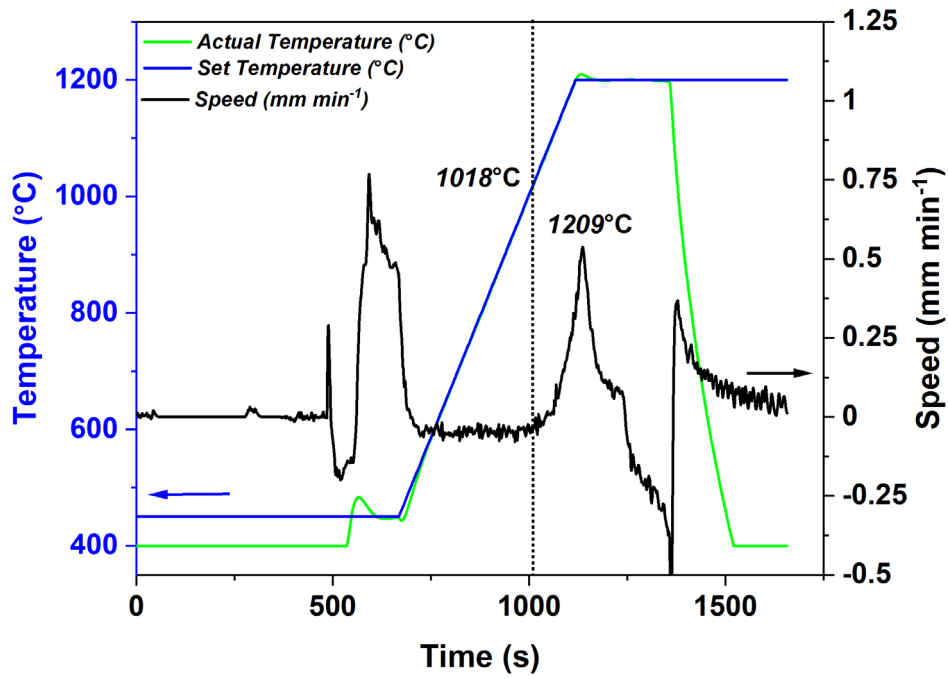

(b)

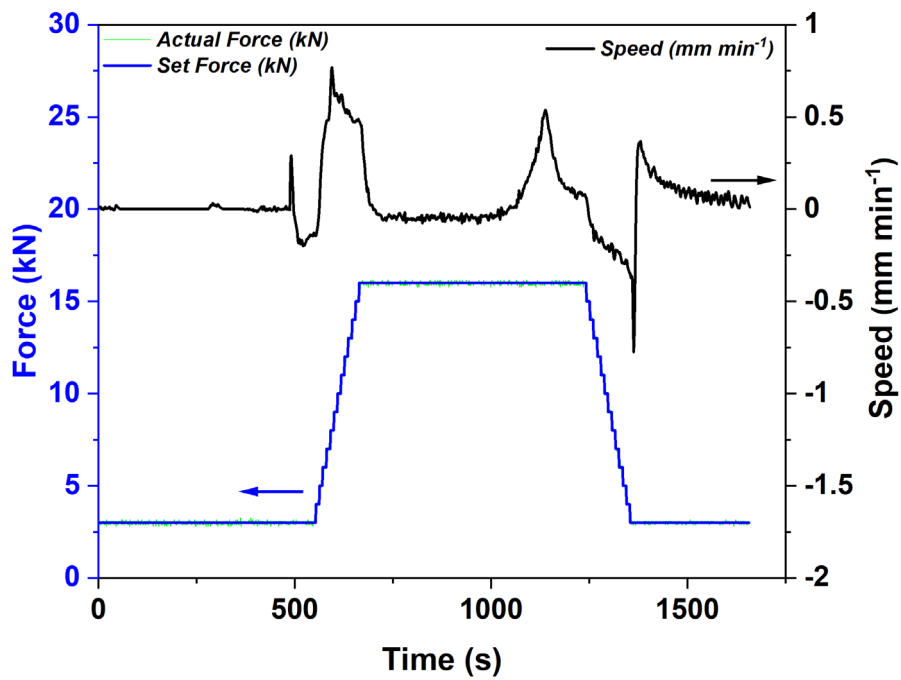

Figure S 4. Spark plasma sintering programs for BTO sintered at 1200 °C and pressed at 16 kN (50 MPa for 20 mm diameter sample) showing (a) temperature and speed vs. time and (b) force and speed vs. time.

### **1.3 Scanning Electron Microscopy (SEM)**

Scanning electron micrographs were collected using a FEI Helios NanoLab 660 dual beam scanning electron microscope to determine the microstructure of the spark plasma sintered BaTiO<sub>3</sub> polished pellets. The sample was mounted on an SEM stub using carbon double sided adhesive tape.

### **1.4 Powder X-ray diffraction (PXRD)**

PXRD profiles were measured on a PANalytical X'Pert Pro MPD, powered by a Philips PW3040/60 X-ray generator using Cu Ka radiation ( $\lambda = 1.540598$  Angstroms) at 40 kV and a current of 40 mA. X-ray diffraction patterns were measured using a PW3050/60 goniometer and a PW3064/60 reflection-transmission sample stage with a revolution time of 8 seconds. The incident beam optics comprised a Nickel beta filter, 0.04 radian Soller slits, a 15mm fixed incident beam mask, a 1/4° divergence slit, and a 1/2° anti-scatter slit. The diffracted beam optics were composed of 0.04 radian Soller slits, a 5.0 mm anti-scatter slit, and a PIXcel1D-Medipix3 detector in scanning line detector (1D) mode. The total scan time was 8.5 hours, and the final spectra consisted of a superposition of two runs. The program for each run employed a 5°–140°  $2\theta$  scanning range with a 90 ms dwell time and a scan step size of 0.0033°. XRD diffraction spectra were fit to the identified phases using the HighScore Plus software. Following background subtraction and spectra peak determination, phases were identified and matched from the Crystallographic Open Database (COD).

## 1.5 Post-Synthetic Reduction and Oxidation Program to Incorporate Ionosorbed Oxygen Species

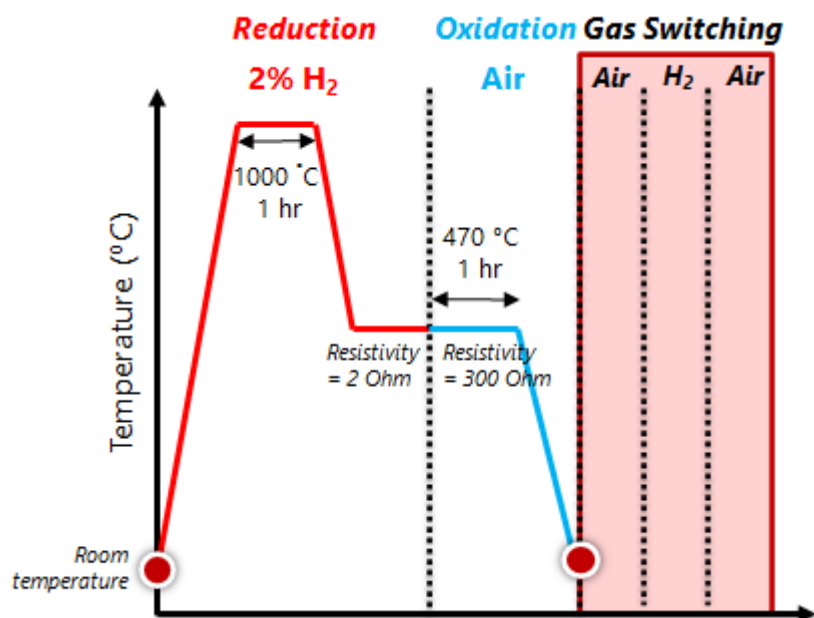

Figure S 5. Diagrammatic representation of the temperature and gas treatment program used to generate H<sub>2</sub> sensing Pt-BTO, involving reduction in 2% H<sub>2</sub> at 1000 °C for 1 hour, followed by partial reoxidation at 460 °C and 470 °C for 75 and 55 minutes, respectively. The initial gas switching experiments were performed at room temperature and by switching from flowing air (250 ml min<sup>-1</sup>) to 2% H<sub>2</sub> in Ar and then back to air.



## 1.6 Total Resistance Increase During Oxidation

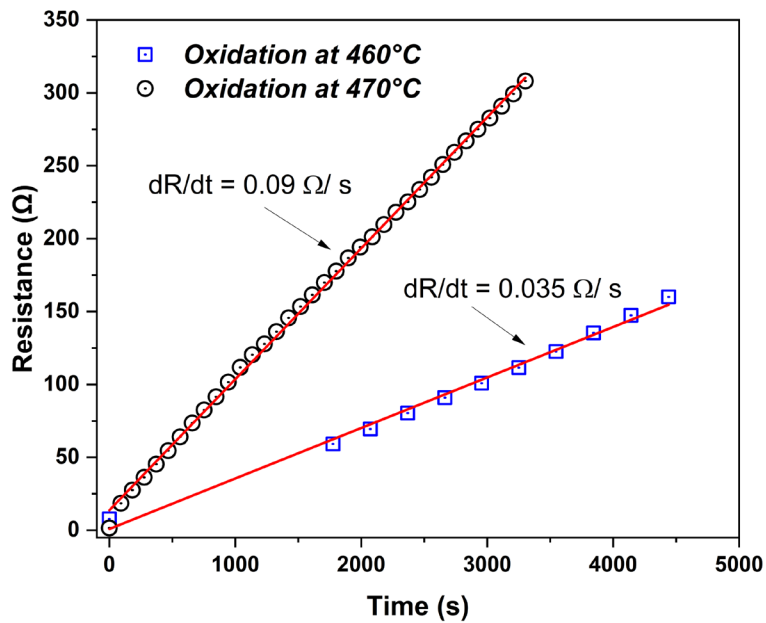

Figure S 6. Increase in the resistance of Pt-BTO during reoxidation under air ( $250 \text{ ml min}^{-1}$ ) at  $460 \text{ } ^\circ\text{C}$  and  $470 \text{ } ^\circ\text{C}$ .

## 1.7 Electrochemical Impedance Spectroscopy (EIS)

### 1.7.1 Kramers Kronig Analysis

a)

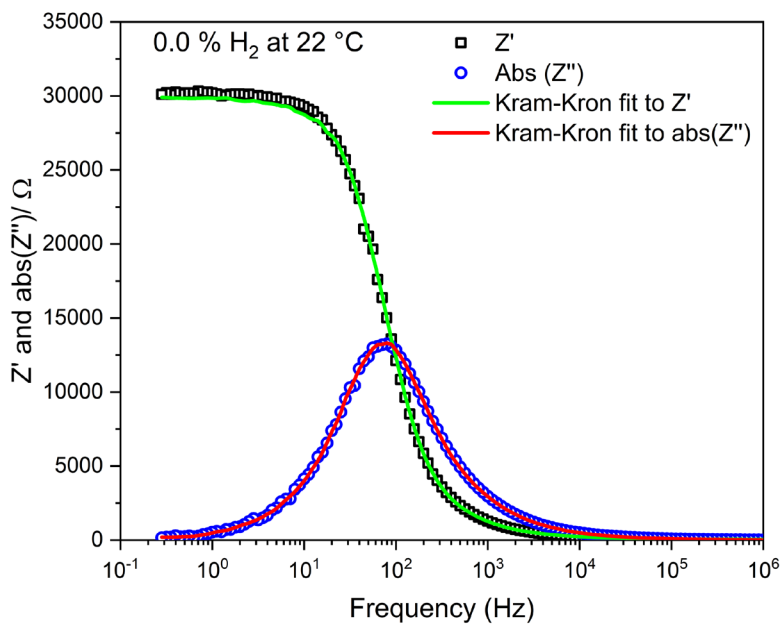

b)

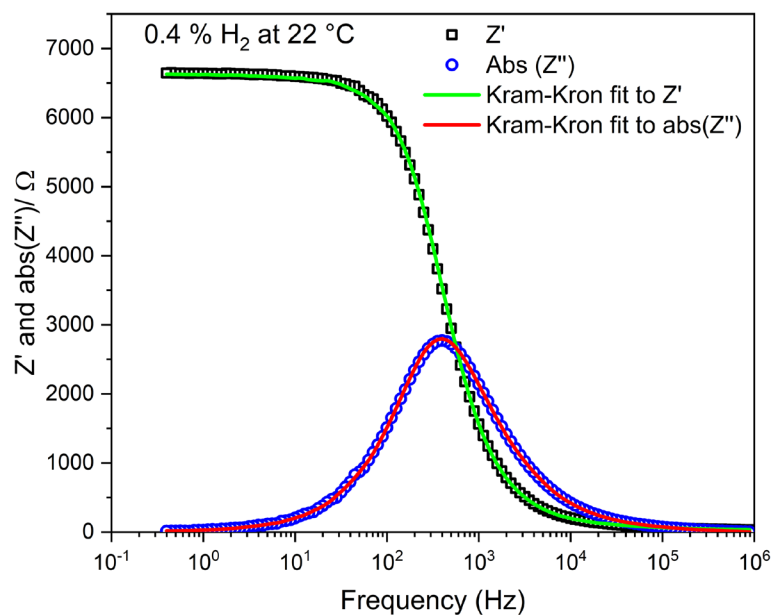

Figure S 7. Kramers-Kronig model fitting to high resolution impedance data (30 points per decade) for Pt-BTO-470 at 22 °C and exposed to 0.4%  $\text{H}_2$  in  $\text{N}_2$  showing that the measurement system obeys the rules of linearity, time invariance, and causality.

## 2 Results and Discussion

### 2.1 Scanning Electron Microscopy

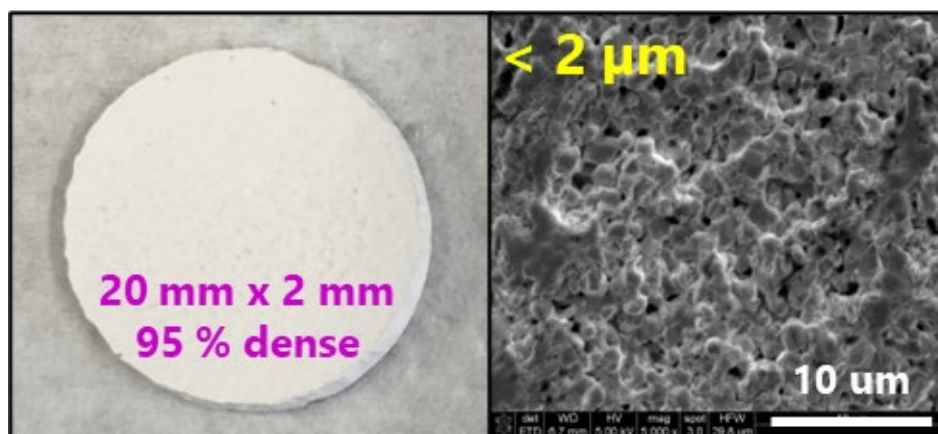

Figure S 8. (Left) BaTiO<sub>3</sub> pellet after spark plasma sintering in argon at 1200 °C and pressing at 50 MPa, designated was BTO-SPS. (Right) scanning electron micrograph of BTO pellet showing granular morphology.

### 2.2 Sintered Pellet Density and N<sub>2</sub> Surface Area Measurements

Density measurements were performed using the Archimedes method on a Mettler Toledo XP-205DR balance with a density measurement accessory. Samples were dried at 120 °C for 12 hours prior to density measurements. Ultra-pure water was degassed under vacuum and magnetically stirred for 3 hours prior to the density measurements.

Table S 2. SPS BTO pellet properties: density and porosity characterisation for samples.

| Sample         | Arch. Density (g cm <sup>-3</sup> ) | Relative Density (%) | N <sub>2</sub> BET Surface Area (m <sup>2</sup> /g) |
|----------------|-------------------------------------|----------------------|-----------------------------------------------------|
| SPS BTO pellet | 5.736                               | 95.3                 | 0.20 ± 0.04                                         |

### 2.3 Powder X-Ray Diffraction (PXRD)

a)

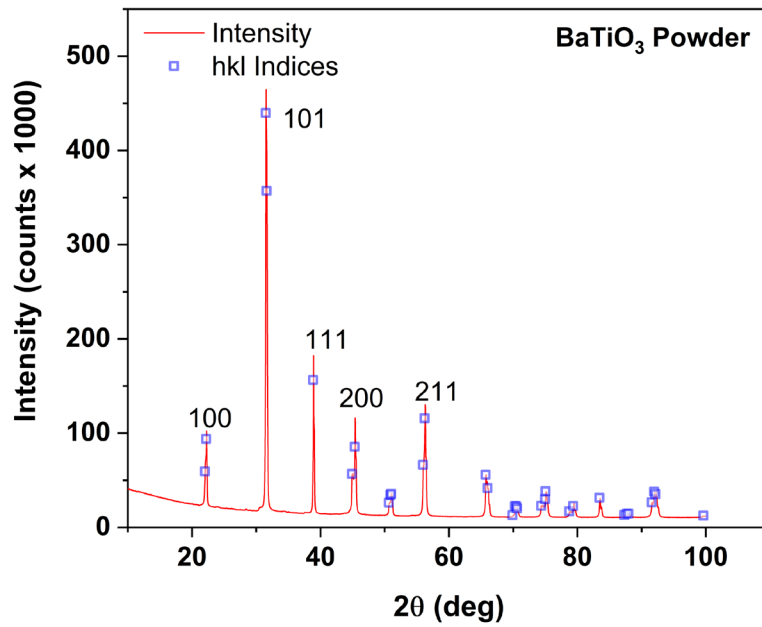

b)

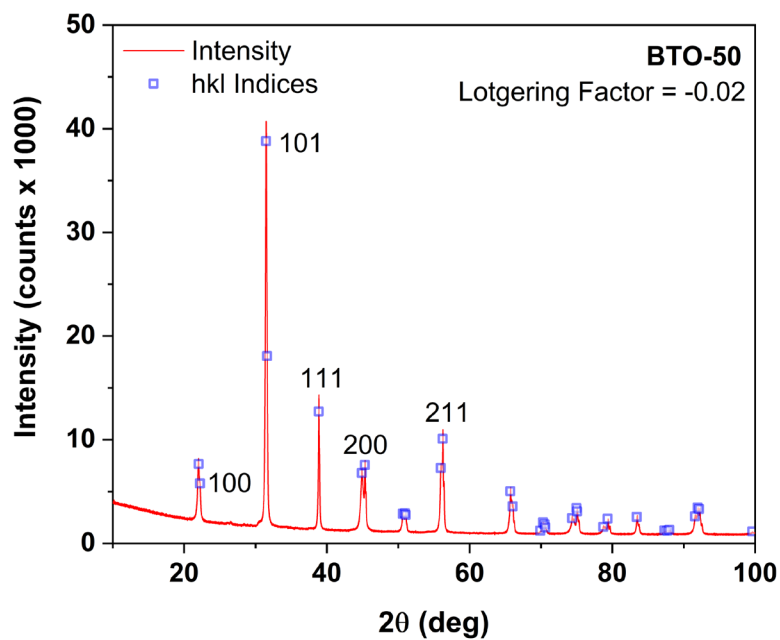

Figure S 9. Powder x-ray diffraction spectra of (a) as-received BaTiO<sub>3</sub> powder and (b) BTO spark plasma sintered sample, showing phase-pure and textureless BaTiO<sub>3</sub> (as calculated by the Lotgering factor).

## 2.4 Controlled Oxidation

### 2.4.1 Oxidation at 460 °C

a)

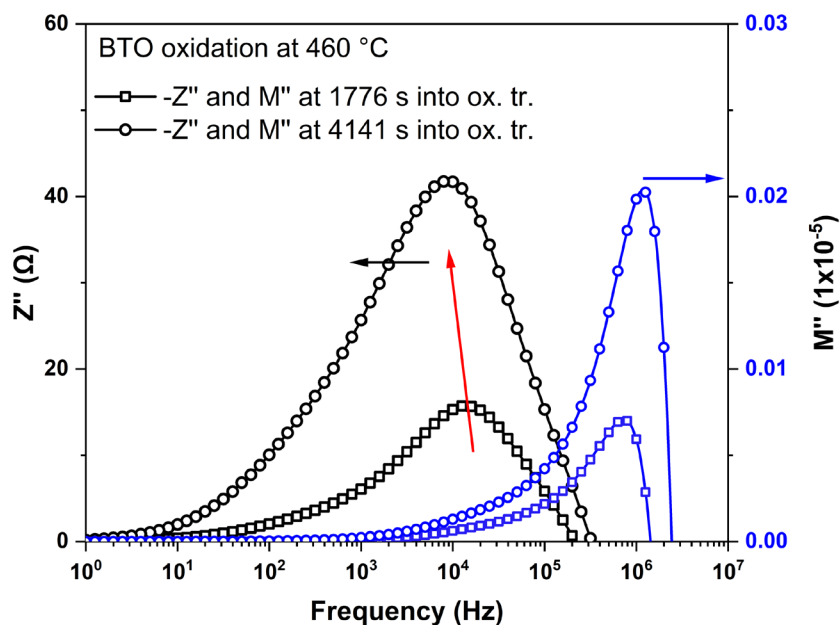

b)

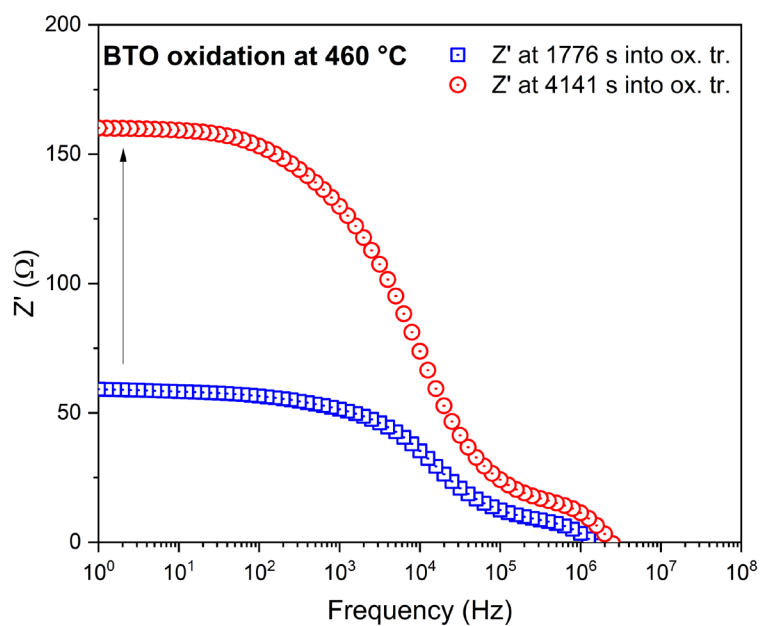

Figure S 10. Spectroscopic plots of (a)  $Z''$  and  $M''$  vs. frequency and (b)  $Z'$  vs. frequency for Pt-BTO during oxidation at 460 °C under flowing air ( $250 \text{ ml min}^{-1}$ ), forming Pt-BTO-460.

## 2.4.2 Oxidation at 470 °C

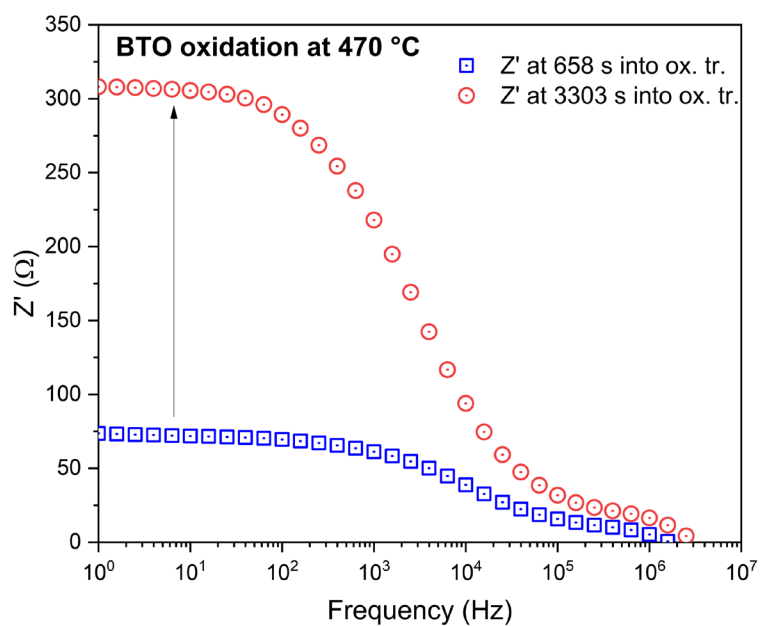

Figure S 11. Spectroscopic plots of (a)  $Z''$  and  $M''$  vs. frequency and (b)  $Z'$  vs. frequency for Pt-BTO during oxidation at 470 °C under flowing air ( $250 \text{ ml min}^{-1}$ ), forming Pt-BTO-470.

## 2.5 Gas Sensing: Switching from Air to $\text{H}_2$ to Air at 22 °C

### 2.5.1 Sample oxidised at 460 °C

a)

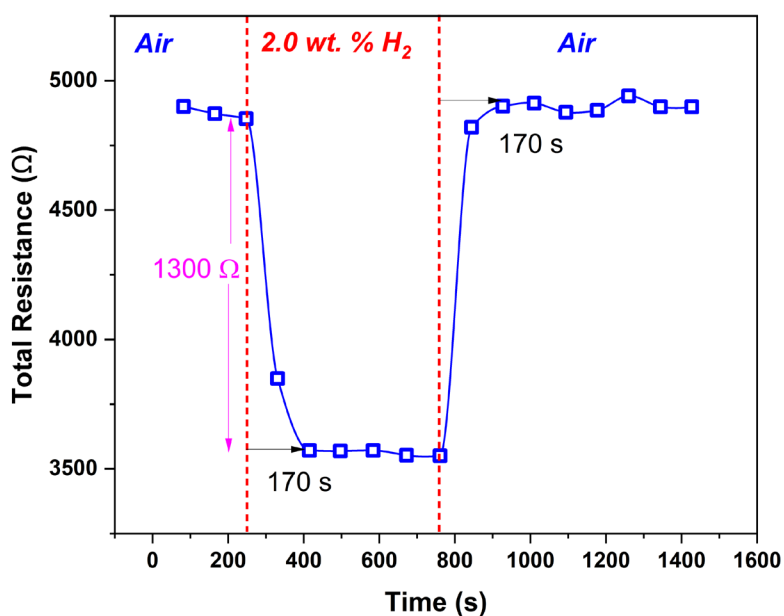

b)

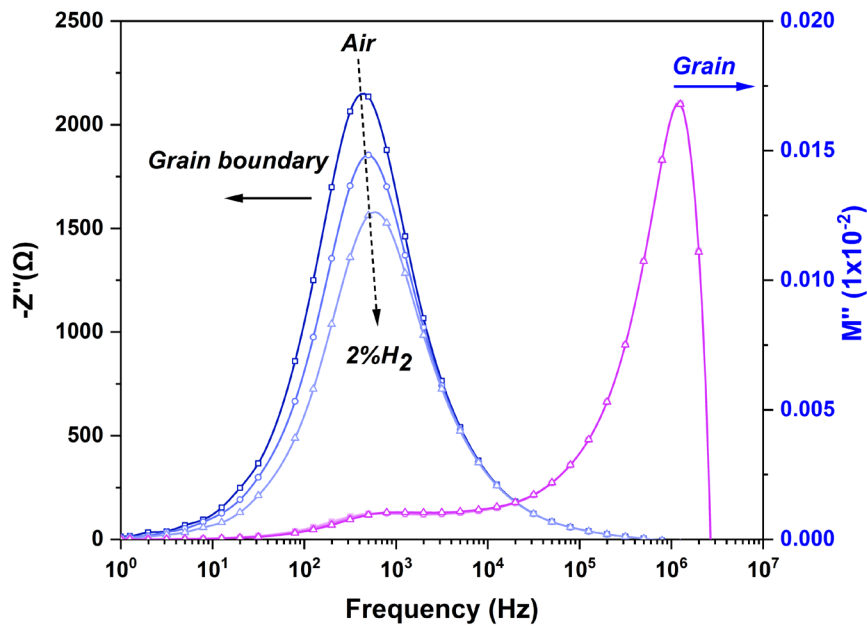

Figure S 12. (a) Change in the resistance of Pt-BTO-460 when switching from air ( $250 \text{ ml min}^{-1}$ ) to 2%  $\text{H}_2$  in  $\text{N}_2$  ( $250 \text{ ml min}^{-1}$ ) and then back to air at  $22^\circ\text{C}$ . (b) Corresponding spectroscopic plots showing the change in  $Z''$  and  $M''$  vs. frequency for the data in Figure 12(a) during gas switching from air to 2%  $\text{H}_2$  in  $\text{N}_2$ .

## 2.6 Electrochemical Impedance Spectroscopy Response in $\text{N}_2$ and $\text{O}_2$

(a)

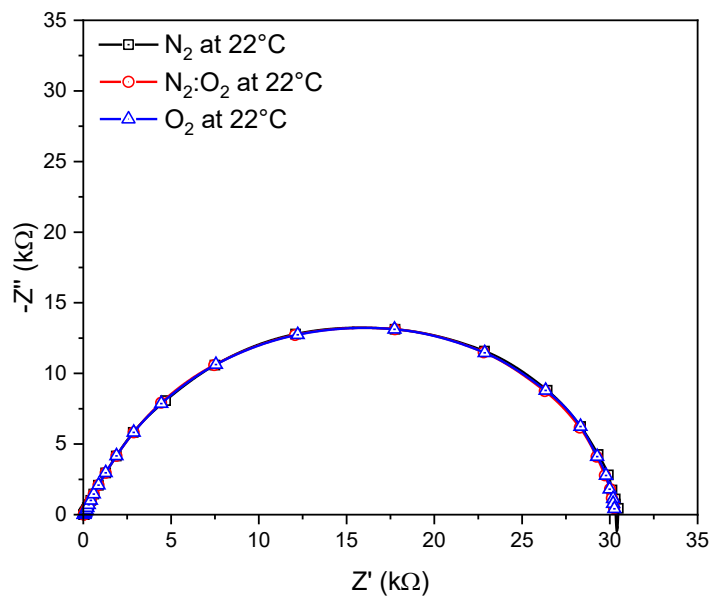

(b)

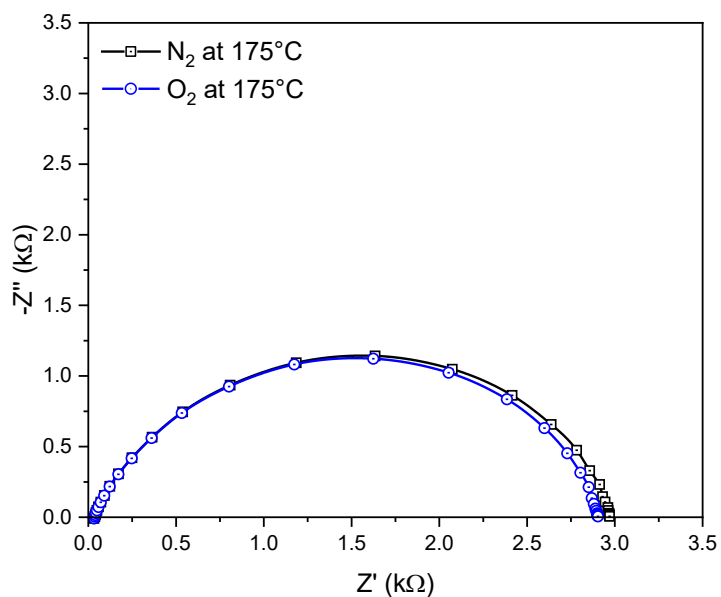

(c)

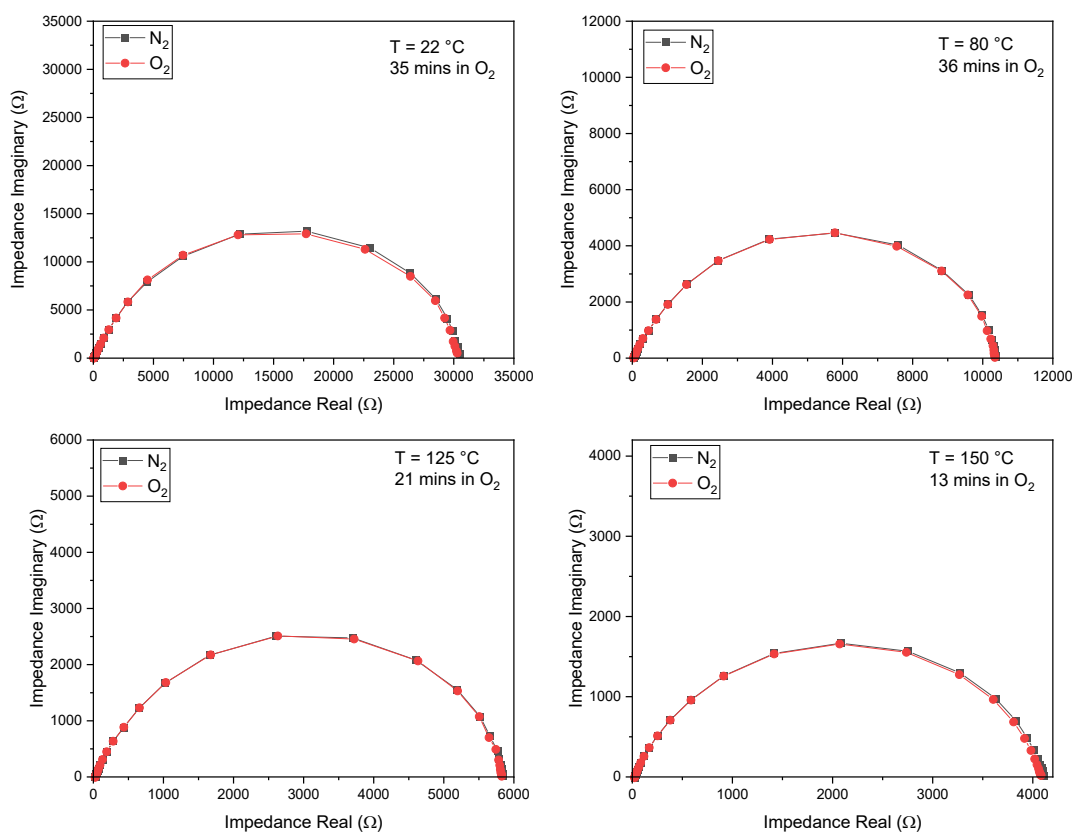

Figure S 13. Nyquist plots showing the impedance response of Pt-BTO-470 under atmospheres of (a) pure N<sub>2</sub>, synthetic air, and pure O<sub>2</sub> at 22 °C, (b) pure N<sub>2</sub> and O<sub>2</sub> at 175 °C, and (c) switching from N<sub>2</sub> to O<sub>2</sub> at 22 – 150 °C and the time spent under an O<sub>2</sub> atmosphere .



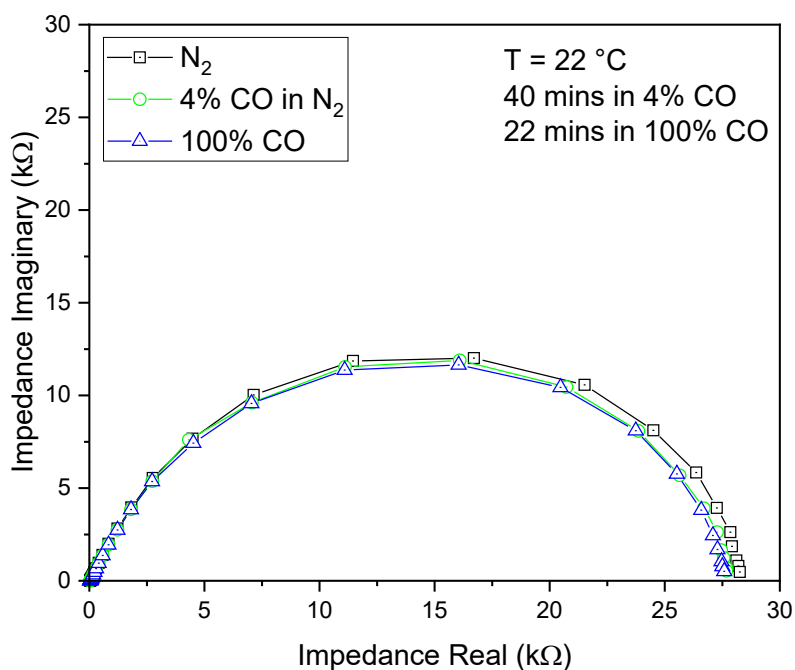

Figure S 14. Nyquist plot showing gas switching from N<sub>2</sub>, to 4% CO, and then to 100% CO for Pt-BTO-470 at 22 °C

## 2.7 Near Ambient Pressure X-Ray Photoelectron Spectroscopy (NAP-XPS)

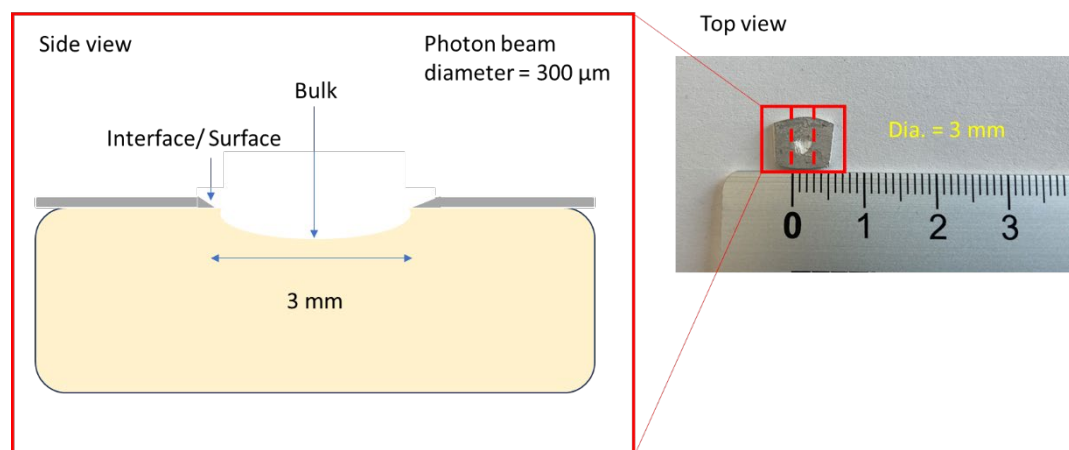

Figure S 15. Pictorial representation of the XPS measurement position at the bulk, away from the Pt-BaTiO<sub>3</sub> interface region. The photon beam is 300 μm in diameter, while the bulk spot is 3 mm in diameter.

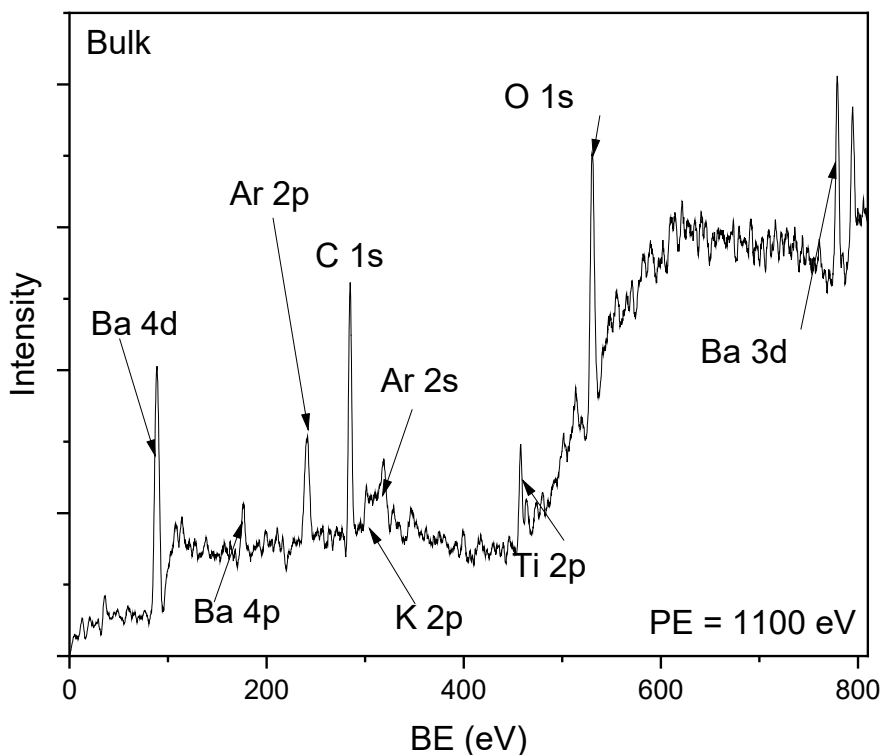

Figure S 16. Survey scan of Pt-BTO-470 at an excitation energy of 1100 eV for the bulk spot region under 1 mbar argon at 22 °C.

### 2.7.1 Quality Assessment of XPS Peak Fitting

The model fits to the NAP-XPS data were analysed using the Chi-squared ( $\chi$ ) and Abbe criterion to assess the quality of the model fits.<sup>1</sup> The Chi-squared quantity gives a measure of the goodness of fit between a set of experimental data points,  $M(i)$ , and the sum of the fit components/ peaks used to model that data,  $S(i, \vec{p})$ , where the  $\vec{p}$  vector is the set of parameters upon which the fit components depend. The Chi-squared is calculated point by point by squaring the difference between  $M(i)$  and the value of the fit at the same point,  $S(i, \vec{p})$ . The Chi-squared values presented in the tables below are from the raw experimental data fits (after Shirley background fitting) and as reported in the XPSPEAK41 fitting software. The relative peak areas are also reported, which were calculated from the area of the  $i^{\text{th}}$  component of the core level under examination divided by the total peak envelope for that core level.

$$\chi^2(\vec{p}) = \sum_{i=1}^N \frac{[M(i) - S(i, \vec{p})]^2}{M(i)}$$

The residual is the difference between the fit and experimental data point.

$$R(i) = S(i, \vec{p}) - M(i)$$

The Abbe criterion quantifies the distribution of the residuals of the fit. For random noise and statistically distributed residuals, the Abbe criterion should be close to or equal to 1. Values close to zero indicate that the data is consistently above or below the fit. A value of 2 indicates that the residuals are anticorrelated (same magnitude but alternating sign). Hence, a value of 1 is desired for a good quality fit.

$$Abbe = \frac{\frac{1}{2} \sum_{i=1}^{N-1} [R(i+1) - R(i)]^2}{\sum_{i=1}^N [R(i)]^2}$$

## 2.7.2 O 1s Photoemission Peak for Pt-BTO-470

Table S 3. O 1s peak deconvolution parameters at 22 °C from 1 mbar argon to 4 mbar H<sub>2</sub>

| Gas Type and Pressure (mbar) | O 1s Components           |           |               |         |           |               |                           |           |               |          |                |
|------------------------------|---------------------------|-----------|---------------|---------|-----------|---------------|---------------------------|-----------|---------------|----------|----------------|
|                              | O <sup>2-</sup> (Lattice) |           |               | OH      |           |               | Adsorbed H <sub>2</sub> O |           |               | $\chi^2$ | Abbe Criterion |
|                              | BE (eV)                   | FWHM (eV) | Rel. Area (%) | BE (eV) | FWHM (eV) | Rel. Area (%) | BE (eV)                   | FWHM (eV) | Rel. Area (%) |          |                |
| 1 mbar Ar                    | 528.9                     | 1.3       | 18.9          | 530.7   | 1.9       | 49.9          | 532.5                     | 1.7       | 12.2          | 268.5    | 0.77           |
| 1 mbar H <sub>2</sub>        | 529.0                     | 1.4       | 21.8          | 530.6   | 1.9       | 34.6          | 532.3                     | 1.75      | 21.8          | 362.7    | 0.66           |
| 2 mbar H <sub>2</sub>        | 529.0                     | 1.3       | 14.5          | 530.6   | 1.9       | 29.0          | 532.4                     | 1.7       | 41.9          | 360.3    | 0.81           |
| 4 mbar H <sub>2</sub>        | 529.0                     | 1.3       | 8.2           | 530.6   | 1.9       | 28.1          | 532.4                     | 1.8       | 55.4          | 378.7    | 0.79           |

Addition to Table S3 above for inclusion of a carbonate peak component to the O 1s peak fitting

| Gas Type and Pressure (mbar) | BE (eV) | FWHM (eV) | Rel. Area (%) |
|------------------------------|---------|-----------|---------------|
| 1 mbar Ar                    | 531.4   | 1.8       | 18.9          |
| 1 mbar H <sub>2</sub>        | 531.6   | 1.8       | 21.8          |
| 2 mbar H <sub>2</sub>        | 531.5   | 1.8       | 14.5          |
| 4 mbar H <sub>2</sub>        | 531.6   | 1.8       | 8.2           |

Table S 4. O 1s peak deconvolution parameters under 2 mbar H<sub>2</sub> and from 22 °C to 150 °C

| Temperature (°C) | O 1s Components           |           |               |         |           |               |                           |           |               |       | $\chi^2$ | Abbe Criterion |
|------------------|---------------------------|-----------|---------------|---------|-----------|---------------|---------------------------|-----------|---------------|-------|----------|----------------|
|                  | O <sup>2-</sup> (Lattice) |           |               | OH      |           |               | Adsorbed H <sub>2</sub> O |           |               |       |          |                |
|                  | BE (eV)                   | FWHM (eV) | Rel. Area (%) | BE (eV) | FWHM (eV) | Rel. Area (%) | BE (eV)                   | FWHM (eV) | Rel. Area (%) |       |          |                |
| 22               | 529.0                     | 1.3       | 14.54         | 530.6   | 1.9       | 29.03         | 532.4                     | 1.7       | 41.89         | 360.3 | 0.81     |                |
| 80               | 529.0                     | 1.3       | 10.83         | 530.6   | 1.9       | 26.94         | 532.4                     | 1.8       | 51.41         | 428.7 | 0.63     |                |
| 125              | 529.0                     | 1.3       | 9.47          | 530.6   | 1.9       | 22.02         | 532.4                     | 1.9       | 59.04         | 296.3 | 0.95     |                |
| 150              | 529.1                     | 1.3       | 10.57         | 503.7   | 1.9       | 20.34         | 532.3                     | 1.8       | 58.52         | 306.6 | 0.90     |                |

Addition to Table S4 above for inclusion of a carbonate peak component to the O 1s peak fitting

| Gas Type and Pressure (mbar) | BE (eV) | FWHM (eV) | Rel. Area (%) |
|------------------------------|---------|-----------|---------------|
| 22                           | 531.5   | 1.8       | 14.54         |
| 80                           | 531.6   | 1.8       | 10.83         |
| 125                          | 531.6   | 1.8       | 9.47          |
| 150                          | 531.7   | 1.8       | 10.57         |

(a)

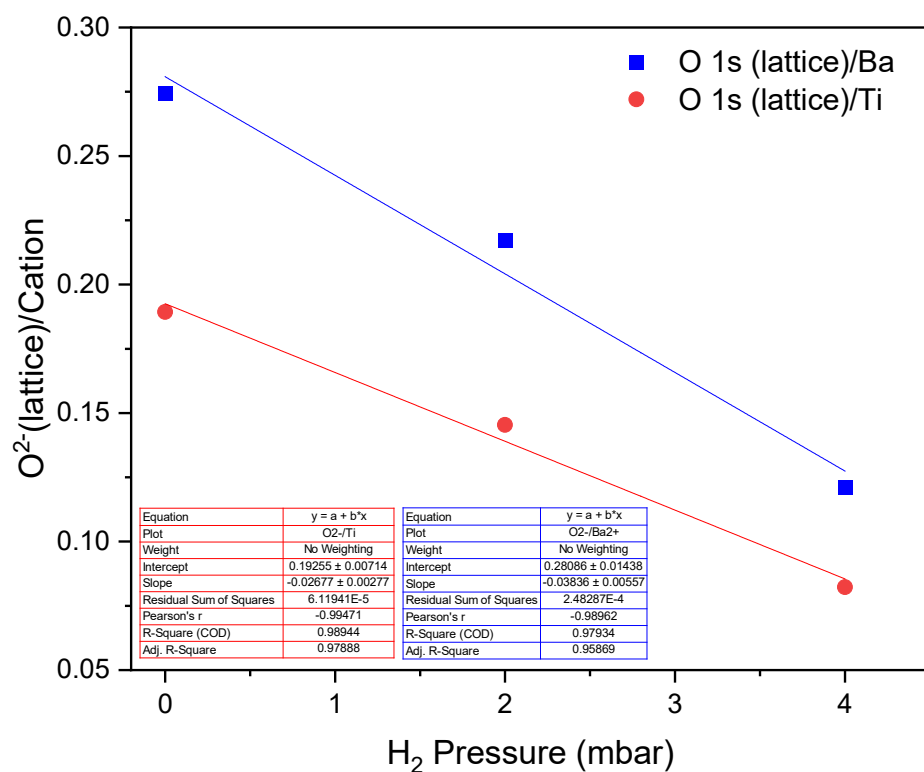

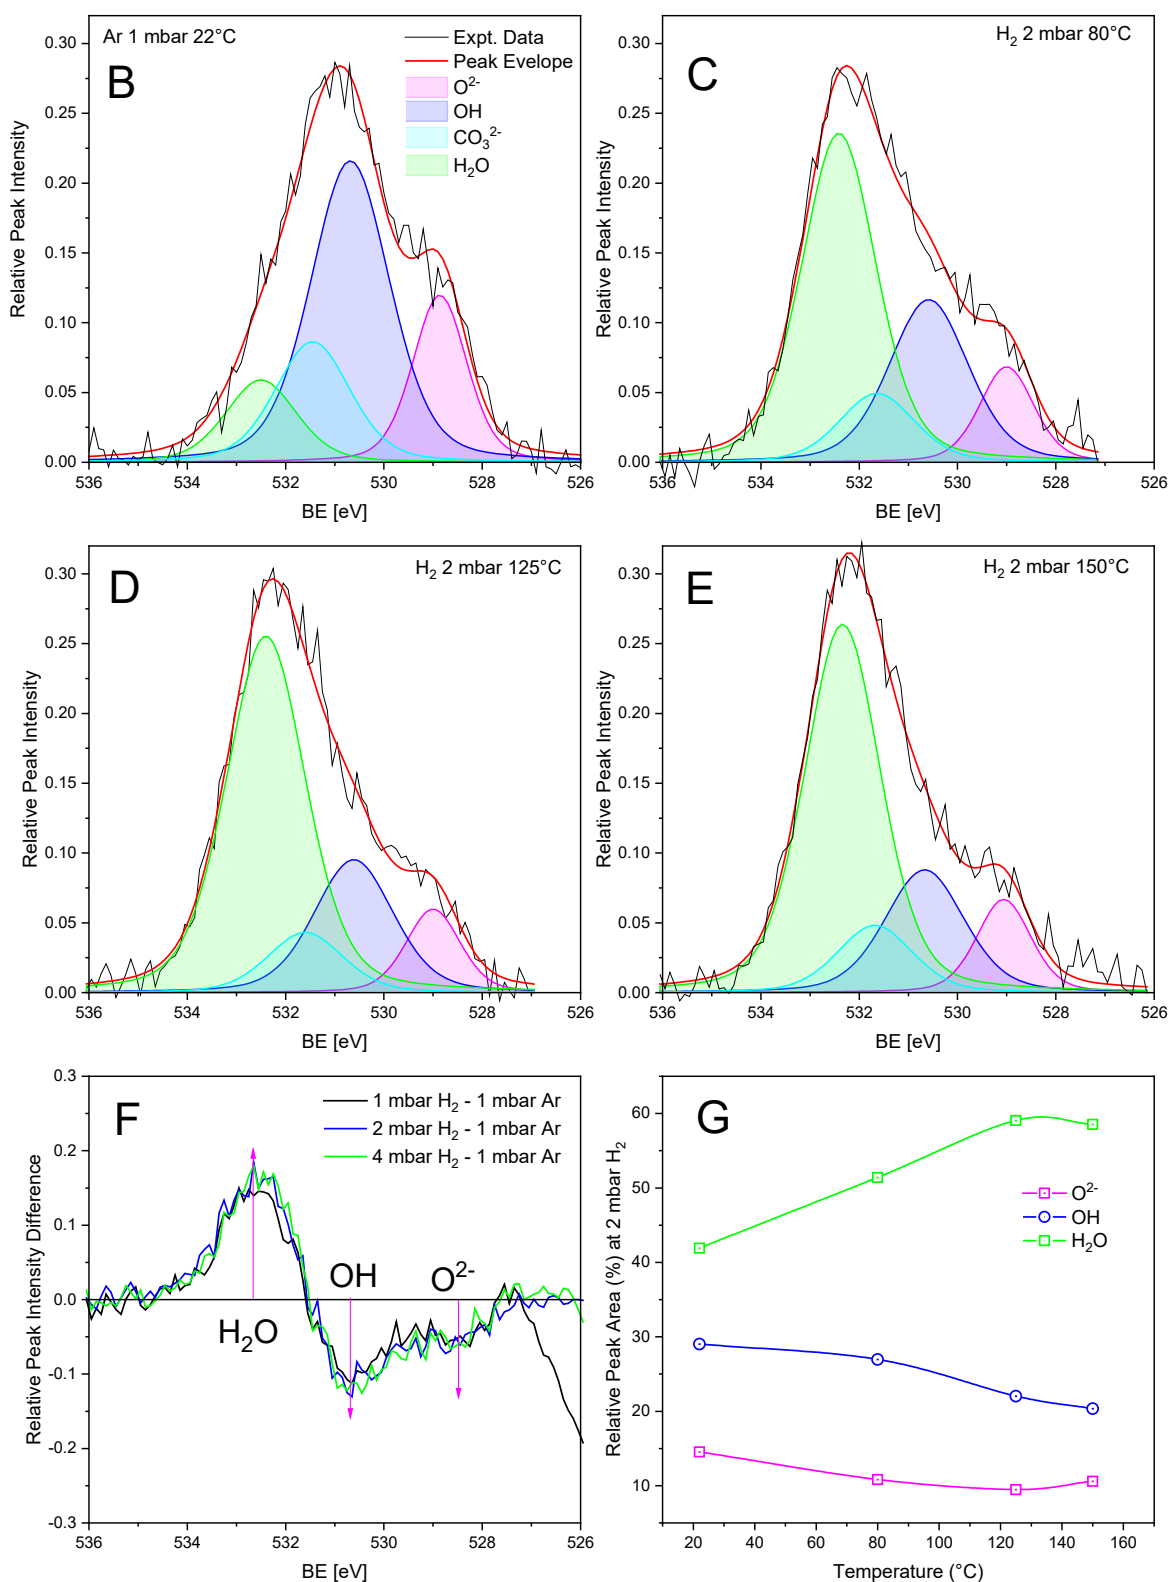

Figure S 17. a) Ratio of the lattice oxygen (O<sup>2-</sup>) peak area from O 1s to the BaTiO<sub>3</sub> Ba 4d and Ti 2p peak areas as a function of H<sub>2</sub> pressure. O 1s photoemission spectra, and peak deconvolution, collected at the BaTiO<sub>3</sub> spot (using a photon energy of 850 eV) and under atmospheres of (b) 1 mbar argon at 22 °C, (c) 2 mbar H<sub>2</sub> at 80 °C (d) 2 mbar H<sub>2</sub> at 125 °C,

and (e) 2 mbar H<sub>2</sub> at 150 °C. (f) Difference spectra of the O 1s photoemission signal with increasing H<sub>2</sub> pressure, calculated using the 1 mbar argon spectrum as a reference. (g) Change in the O 1s relative peak areas under 2 mbar of H<sub>2</sub> and as a function of temperature.

### 2.7.3 C 1s Photoemission Peak for Pt-BTO-470

The C1s photoemission spectra for Pt-BTO-470 under 1 mbar argon and 1-4 mbar H<sub>2</sub> are shown in Fig S16 a-d, and the relative peak areas are shown in Table S.5. Spectra were collected using a photon energy of 850 eV and can be deconvoluted into four components centered at 282.2-283 eV, 284.8 eV, 286-287 eV, and 288-289 eV, which corresponding to Ti-C, Sp<sup>3</sup> C-C, C-O, and CO<sub>3</sub><sup>2-</sup> species (Fig S.16).<sup>2</sup> The adventitious carbon peak (Sp<sup>3</sup> C-C) occupies 65-72 % (Table 5) of the relative peak envelope area. These relative areas are comparable to those found by Miot et al.<sup>2</sup> and explained by air contamination, or in our case, also due to contamination from the graphite molds during spark plasma sintering. However, the contribution of SPS contamination should be minimal as the surface was polished and underwent post-sintering oxidation to remove as much carbon as possible. The relative peak areas did not change significantly with increasing H<sub>2</sub> pressure, and this was confirmed by plotting the C 1s difference spectra, using the 1 mbar Ar spectrum as a reference (Fig. S16 e and f). There is a peak centered at 282 eV and this could be attributed to the presence of a titanium carbide Ti-C bond, which may have formed during spark plasma sintering.<sup>3</sup> However, a corresponding peak should also appear in the Ti 2p spectrum at 455 eV<sup>4</sup> (see below), and it is difficult to resolve this due to the high noise level, and also due to possible asymmetry at lower binding energy, of the Ti 2p photoemission spectra. Additionally, a carbonate peak is present at 288-289 eV, which increases slightly with H<sub>2</sub> pressure. Therefore, a carbonate peak was added to the O 1s spectra fitting to ensure reliable relative peak area determination of O<sup>2-</sup>, OH and adsorbed H<sub>2</sub>O components.

Table S 5. Pt-BTO-470 Relative component areas (%) binding energies (eV), FWHM (eV), and Abbe values for C 1s XPS analysis at 22°C from 1 mbar argon to 4 mbar H<sub>2</sub>

| Gas Type and Pressure | C 1s Components (Relative Areas/ %) |                            |                                |                                | $\chi^2$ | Abbe Criterion |
|-----------------------|-------------------------------------|----------------------------|--------------------------------|--------------------------------|----------|----------------|
|                       | FWHM=1.6<br>282.2-<br>283eV         | FWHM=1.9<br>284.8 eV       | FWHM=1.6-<br>1.7<br>286-2870eV | FWHM=1.6-<br>1.7<br>288-289 eV |          |                |
|                       | Ti-C                                | (Sp <sup>3</sup> ) C-C/C-H | C-O                            | BaCO <sub>3</sub>              |          |                |
| 1 mbar Ar             | 10.35                               | 66.92                      | 9.11                           | 13.62                          | 315.5    | 0.88           |
| 1 mbar H <sub>2</sub> | 10.10                               | 64.95                      | 12.33                          | 12.63                          | 378.0    | 0.60           |
| 2 mbar H <sub>2</sub> | 9.06                                | 67.88                      | 14.92                          | 8.14                           | 389.7    | 0.69           |
| 4 mbar H <sub>2</sub> | 6.97                                | 72.16                      | 12.51                          | 8.35                           | 247.4    | 1.05           |

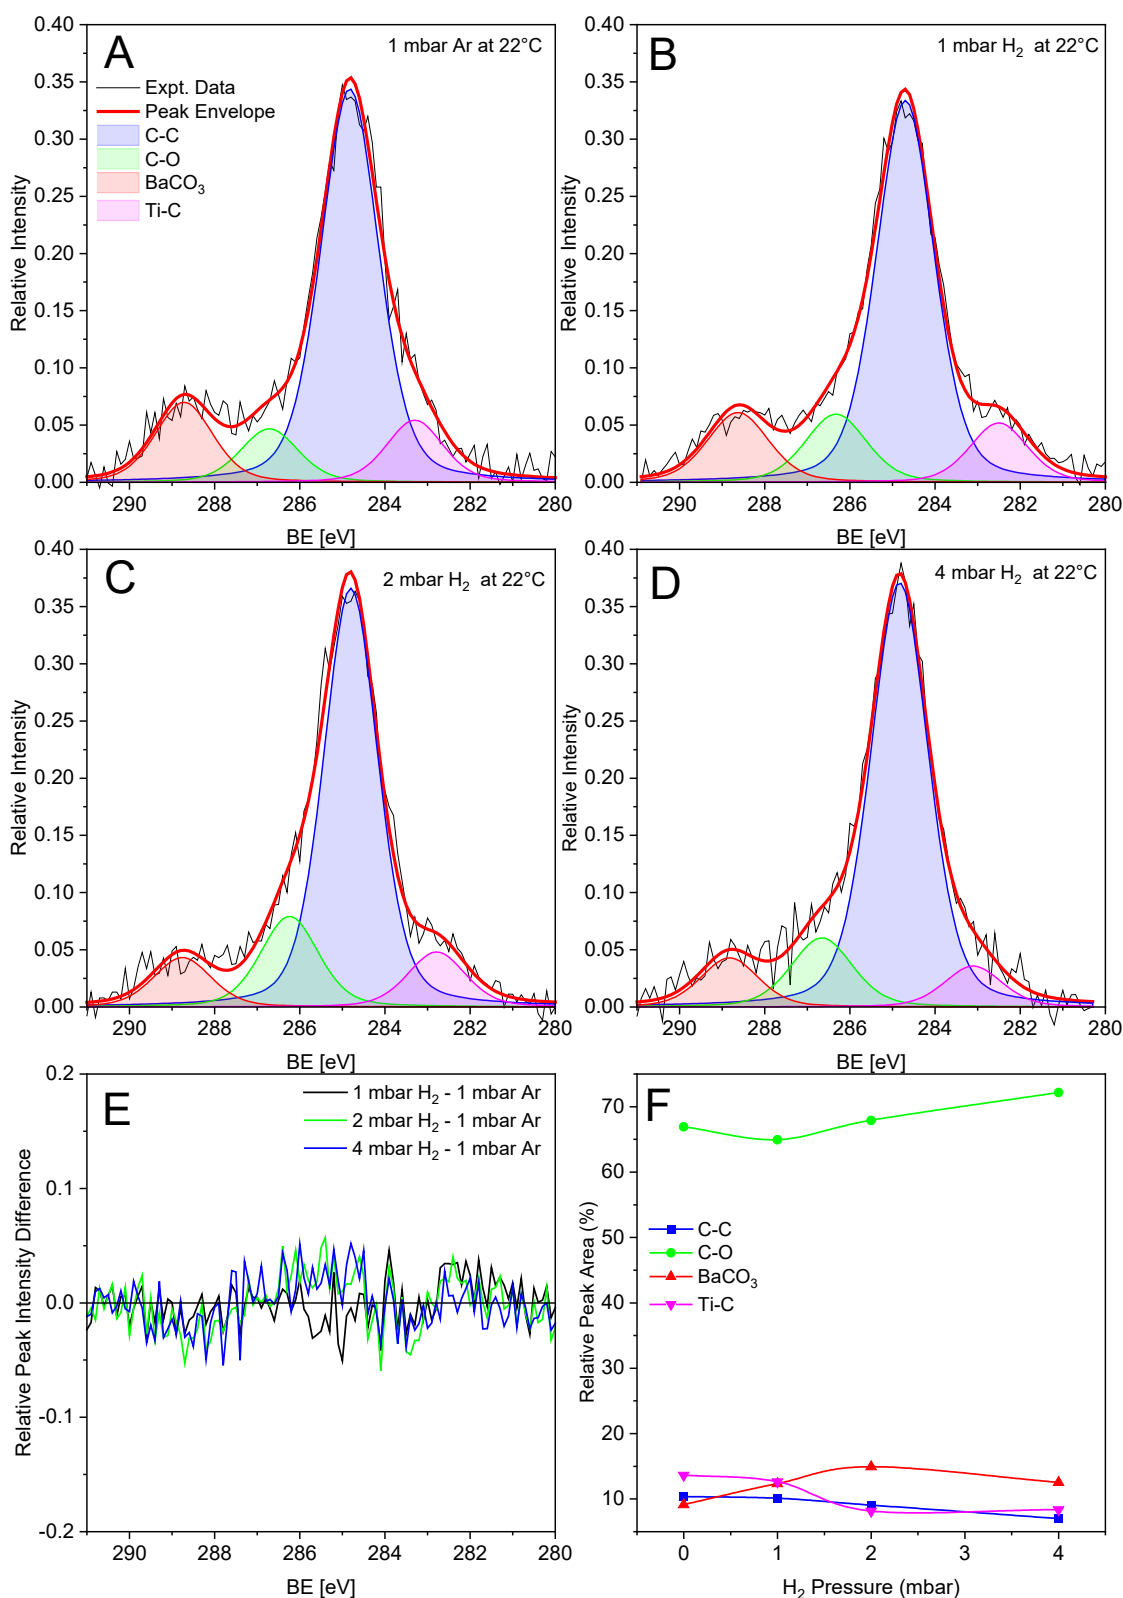

Figure S 18. C 1s photoemission spectra, and peak deconvolution, collected at 22 °C at the BaTiO<sub>3</sub> spot (using a photon energy of 850 eV) and under atmospheres of (a) 1 mbar argon, (b) 1 mbar H<sub>2</sub>, (c) 2 mbar H<sub>2</sub>, and (d) 4 mbar H<sub>2</sub>. (e) Difference spectra of the C 1s

photoemission signal with increasing H<sub>2</sub> pressure, calculated using the 1 mbar argon spectrum as a reference. (f) Change in the C 1s relative peak areas as a function of H<sub>2</sub> pressure at 22 °C.

#### 2.7.4 Ti 2p Photoemission Peak for Pt-BTO-470

The Ti 2p photoemission spectra for Pt-BTO-470 under 1 mbar argon and 1-4 mbar H<sub>2</sub> are shown in Fig S17 a-d, and the relative peak areas are shown in Table S6. Spectra were collected using a photon energy of 850 eV and can be deconvoluted into one doublet component with the Ti 2p<sub>3/2</sub> peak centered at a binding energy of 457.7 – 457.9 eV, which is representative of Ti<sup>4+</sup>.<sup>2, 5</sup> The spin orbit splitting between Ti 2p<sub>3/2</sub> and Ti 2p<sub>1/2</sub> peak is between 5.7 to 5.8 eV, which is consistent with values in the literature.<sup>5</sup> The Ti-C peak observed in the C 1s photoemission spectra is not observed in the Ti 2p spectra, which should appear at 455 eV; however, the noise level of this data set is high and is difficult to deconvolute the spectra into additional peaks. There was no obvious change in relative peak intensity with increasing H<sub>2</sub> pressure demonstrating that titanium related surface states remained constant. Ti<sup>3+</sup> may be present at lower binding energies (457 eV) but it is difficult to resolve this due to the high spectral noise level.

Table S 6. Ti 2p peak fitting parameters at 22 °C and from 1 mbar argon to 4 mbar H<sub>2</sub>

| Gas Type and Pressure | Ti 2p Components                              |     |      |          |                |
|-----------------------|-----------------------------------------------|-----|------|----------|----------------|
|                       | Ti 2p <sub>3/2</sub> Peak Binding Energy (eV) | SOS | FWHM | $\chi^2$ | Abbe Criterion |
| 1 mbar Ar             | 457.67                                        | 5.7 | 1.4  | 497.2    | 0.54           |
| 1 mbar H <sub>2</sub> | 457.74                                        | 5.8 | 1.4  | 437.8    | 0.50           |
| 2 mbar H <sub>2</sub> | 457.91                                        | 5.7 | 1.4  | 320.1    | 0.77           |
| 4 mbar H <sub>2</sub> | 457.94                                        | 5.7 | 1.4  | 344.5    | 0.74           |



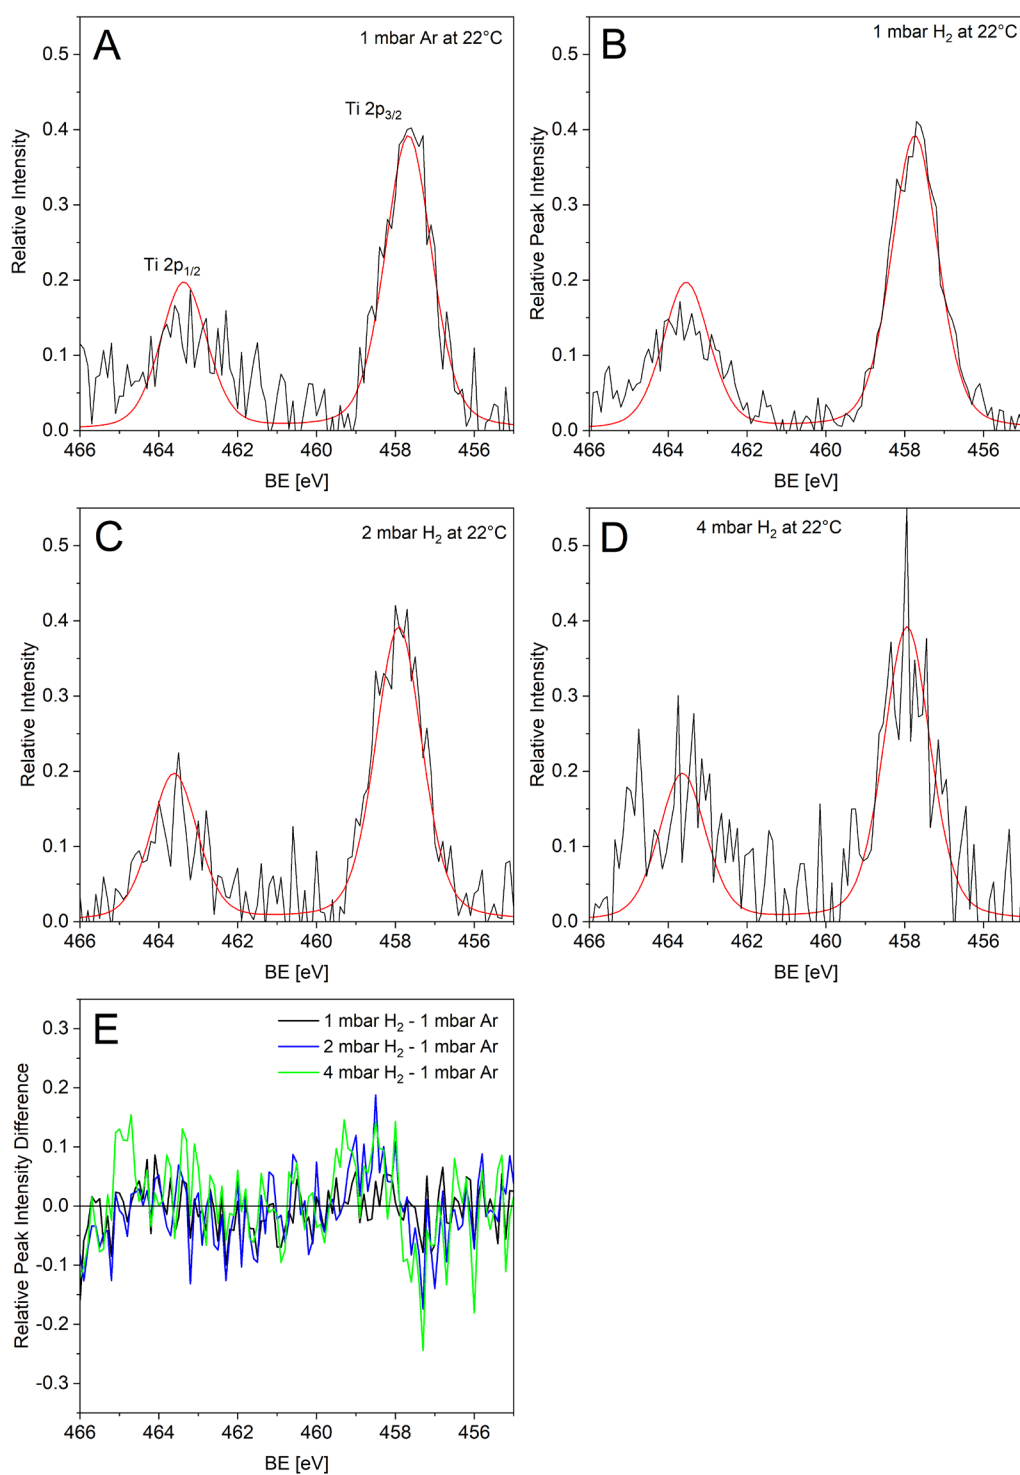

Figure S 19. Ti 2p photoemission spectra, and peak fitting, collected at 22 °C at the Ba-TiO<sub>3</sub> spot (using a photon energy of 850 eV) and under atmospheres of (a) 1 mbar argon, (b) 1 mbar H<sub>2</sub>, (c) 2 mbar H<sub>2</sub>, and (d) 4 mbar H<sub>2</sub>. (e) Difference spectra of the Ti 2p photoemission signal with increasing H<sub>2</sub> pressure, calculated using the 1 mbar argon spectrum as a reference.

### 2.7.5 Ba 4d Photoemission Peak for Pt-BTO-470

The Ba 4d photoemission spectra for Pt-BTO-470 under 1 mbar argon and 1-4 mbar H<sub>2</sub> are shown in Fig S18 a-d, and the relative peak areas are shown in Table S7. Spectra were collected using a photon energy of 850 eV and can be deconvoluted into two doublet components with the Ba 4d<sub>3/2</sub> peak centered at 87.7 – 90.3 eV due to BaTiO<sub>3</sub>, and at 89 – 91.8 eV due to BaCO<sub>3</sub>.<sup>2, 5</sup> There is no change in the Ba 4d relative peak areas with H<sub>2</sub> concentration, which exhibit a constant BaTiO<sub>3</sub> to BaCO<sub>3</sub> ratio of 70:30. This suggests that carbonates are stable and do not react with hydrogen at 22 °C.

Table S 7. Ba 4d peak fitting parameters at 22 °C and from 1 mbar argon to 4 mbar H<sub>2</sub>

| Gas Type and Pressure | Ba 4d Components            |           |                            |           |          |                |
|-----------------------|-----------------------------|-----------|----------------------------|-----------|----------|----------------|
|                       | Peak 1 - BaTiO <sub>3</sub> |           | Peak 2 - BaCO <sub>3</sub> |           | $\chi^2$ | Abbe Criterion |
|                       | Binding Energy (eV)         | Rel. Area | Binding Energy (eV)        | Rel. Area |          |                |
| 1 mbar Ar             | 87.75                       | 0.69      | 89.11                      | 0.31      | 565.0    | 0.66           |
| 1 mbar H <sub>2</sub> | 87.80                       | 0.68      | 89.14                      | 0.32      | 615.7    | 0.50           |
| 2 mbar H <sub>2</sub> | 87.97                       | 0.67      | 89.27                      | 0.33      | 447.4    | 0.93           |
| 4 mbar H <sub>2</sub> | 88.04                       | 0.68      | 89.30                      | 0.32      | 379.0    | 0.83           |

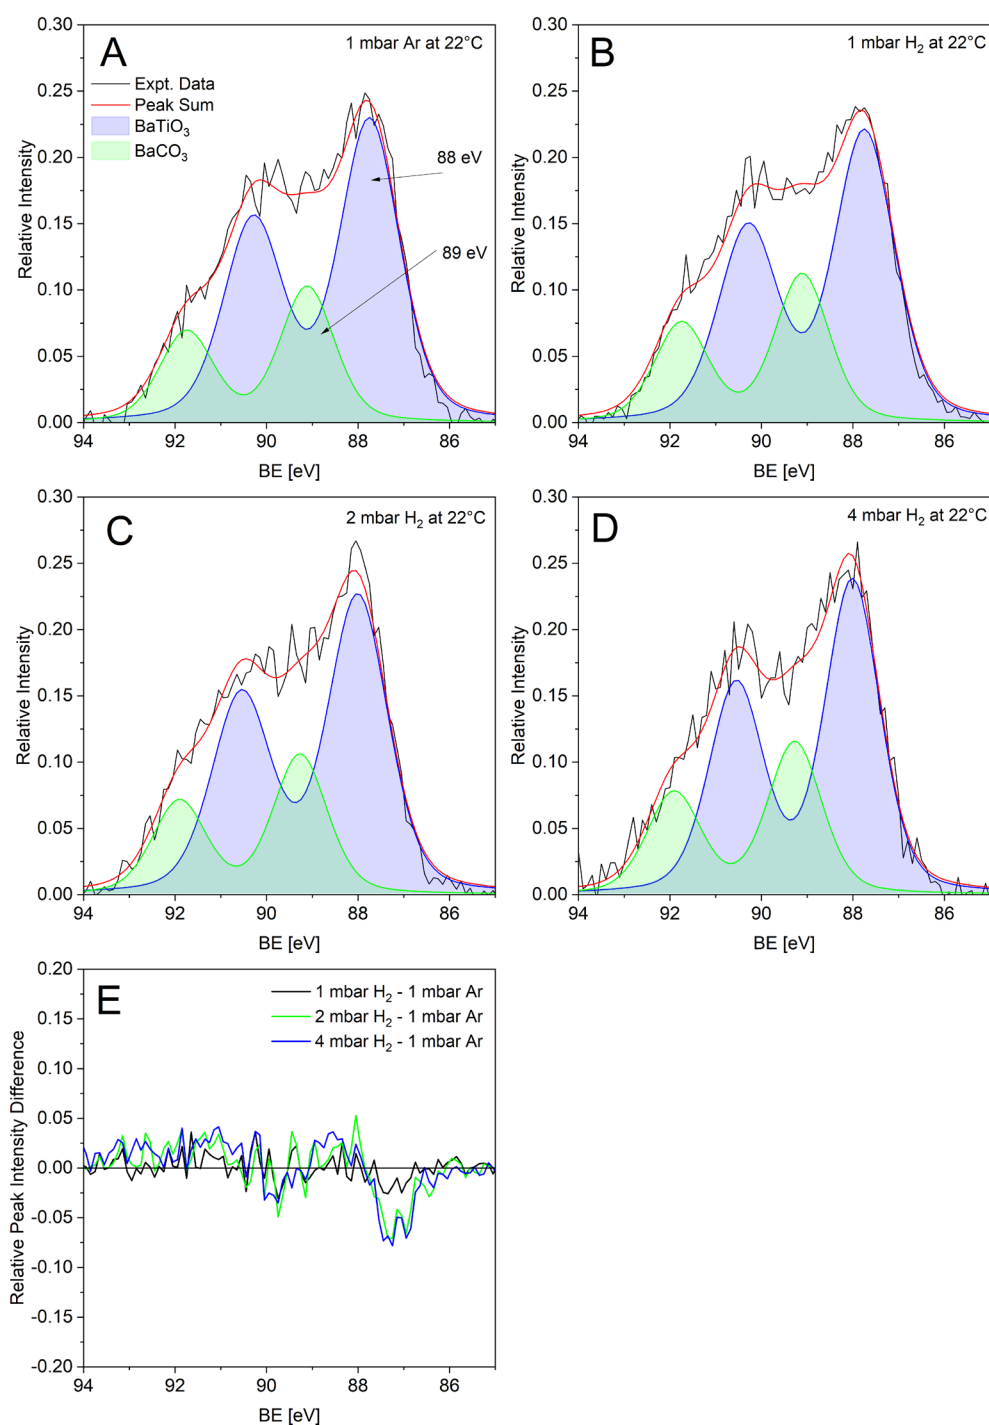

Figure S 20. Ba 4d photoemission spectra, and peak deconvolution, collected at 22 °C at the BaTiO<sub>3</sub> spot (using a photon energy of 850 eV) and under atmospheres of (a) 1 mbar argon, (b) 1 mbar H<sub>2</sub>, (c) 2 mbar H<sub>2</sub>, and (d) 4 mbar H<sub>2</sub>. (e) Difference spectra of the Ba 4d photoemission signal with increasing H<sub>2</sub> pressure, calculated using the 1 mbar argon spectrum as a reference.

## 2.7.6 Pt 4f Photoemission Peak for Pt-BTO-470

The Pt-BaTiO<sub>3</sub> interface region was also studied by XPS to measure the Pt 4f spectrum as a function of H<sub>2</sub> pressure. This was performed to determine the presence of elemental Pt (71 eV) as well as the possible formation of oxides (74 – 75 eV) and hydroxides (73 – 74 eV).<sup>5</sup> The platinum XPS measurements were recorded at a different location to the C 1s, O 1s, Ti 2p, and Ba 4d spectra (which were collected at a pure BaTiO<sub>3</sub> spot where the platinum was removed). The peak fitting parameters for the Pt 4f core level are shown in Table S8 below. The Pt doublet 4f<sub>7/2</sub> peak is centred at approximately 71 eV, which is typical for elemental platinum with a spin orbit splitting of 3.33 eV, as reported in the literature.<sup>5</sup> There was no indication of the formation of Pt oxides or hydroxides and there was no change in the Pt 4f spectral intensity with increasing H<sub>2</sub> pressure, as shown in Fig. S.19 a-e.

Table S 8. Pt 4f peak fitting parameters at 22 °C and from 1 mbar argon to 4 mbar H<sub>2</sub> for the BaTiO<sub>3</sub>-Pt interface region.

| Gas Type and Pressure | Pt 4f Components                              |      |          |                |
|-----------------------|-----------------------------------------------|------|----------|----------------|
|                       | Pt 4f <sub>7/2</sub> Peak Binding Energy (eV) | FWHM | $\chi^2$ | Abbe Criterion |
| 1 mbar Ar             | 70.8                                          | 1.08 | 420.4    | 0.82           |
| 1 mbar H <sub>2</sub> | 70.8                                          | 1.08 | 816.3    | 1.00           |
| 2 mbar H <sub>2</sub> | 70.8                                          | 1.08 | 350.8    | 0.93           |
| 4 mbar H <sub>2</sub> | 70.8                                          | 1.08 | 351.8    | 1.23           |

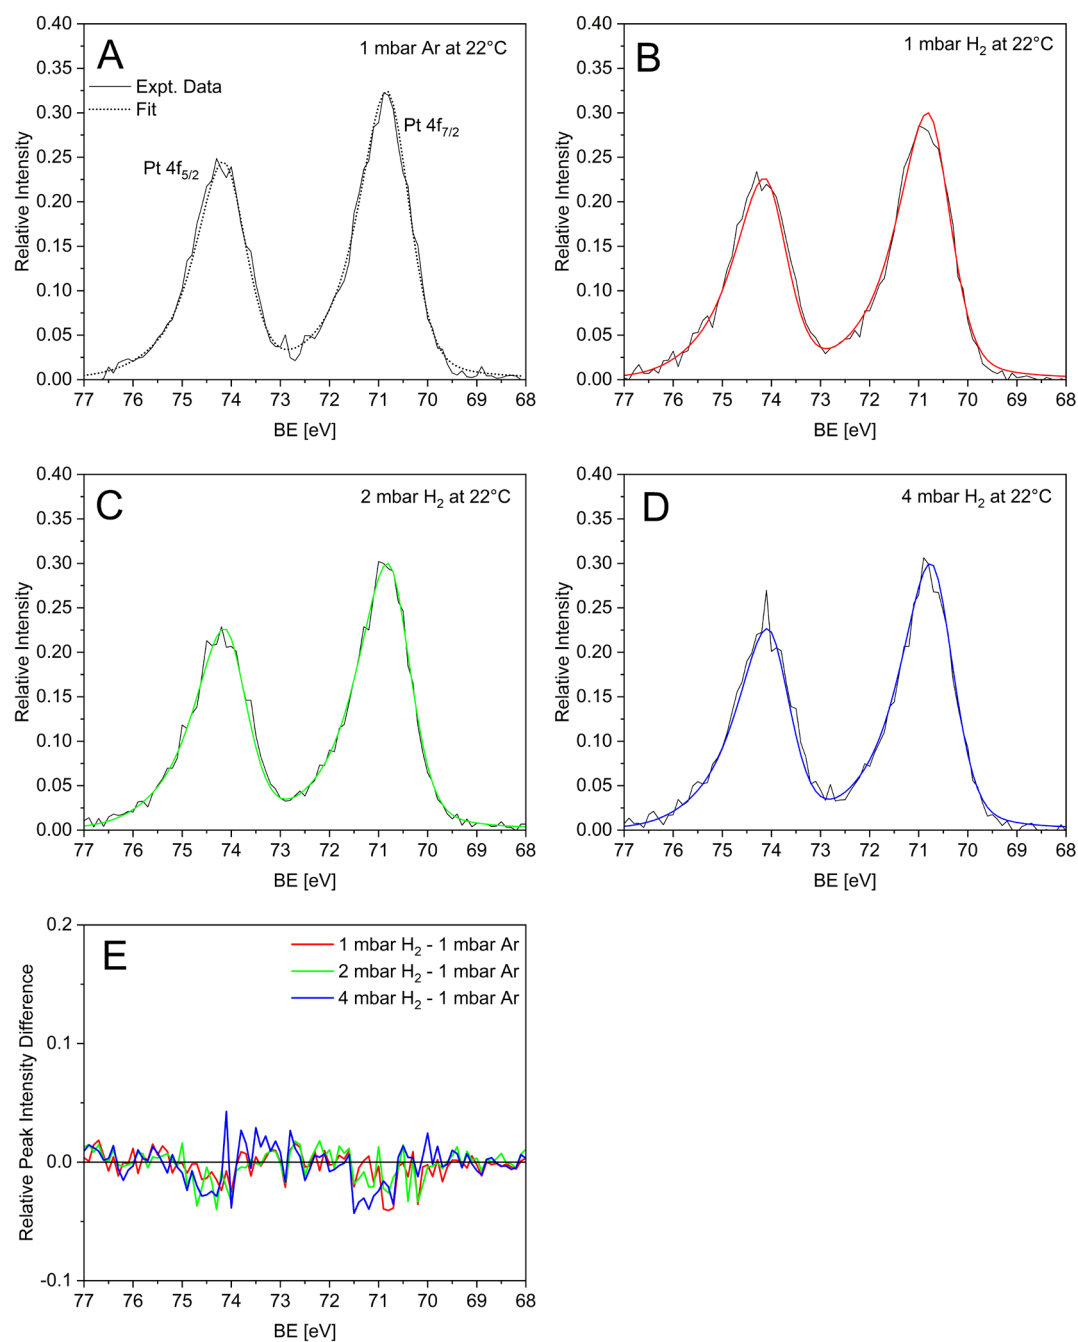

Figure S 21. Pt 4f photoemission spectra, and peak fitting, collected at 22 °C at the Ba-TiO<sub>3</sub>-Pt interface region (using a photon energy of 850 eV) and under atmospheres of (a) 1 mbar argon, (b) 1 mbar H<sub>2</sub>, (c) 2 mbar H<sub>2</sub>, and (d) 4 mbar H<sub>2</sub>. (e) Difference spectra of the Pt 4d photoemission signal with increasing H<sub>2</sub> pressure, calculated using the 1 mbar argon spectrum as a reference.

## 2.8 Electrochemical Impedance Spectroscopy Studies

### 2.8.1 H<sub>2</sub> and D<sub>2</sub> Kinetic isotope Studies at 22 °C and 130 °C

Table S 9. Pt-BTO-470 conductivities in H<sub>2</sub> and D<sub>2</sub> at 22 °C and 130 °C and the corresponding D<sub>2</sub> and H<sub>2</sub> conductivity ratios

| Temperature (°C) | Molar Flow Rate (x 10 <sup>-3</sup> mol min <sup>-1</sup> ) | Cond. in D <sub>2</sub> (x10 <sup>-6</sup> S cm <sup>-1</sup> ) | Cond. in H <sub>2</sub> (x 10 <sup>-6</sup> S cm <sup>-1</sup> ) | D/ H |
|------------------|-------------------------------------------------------------|-----------------------------------------------------------------|------------------------------------------------------------------|------|
| 22               | 0                                                           | 2.91                                                            | 2.77                                                             | 1.05 |
| 22               | 0.35                                                        | 12.94                                                           | 12.09                                                            | 1.07 |
| 22               | 0.92                                                        | 14.56                                                           | 13.91                                                            | 1.05 |
| 22               | 2.60                                                        | 15.76                                                           | 14.96                                                            | 1.05 |
| 130              | 0                                                           | 14.31                                                           | 13.40                                                            | 1.07 |
| 130              | 0.35                                                        | 116.66                                                          | 107.76                                                           | 1.08 |
| 130              | 0.92                                                        | 147.96                                                          | 140.26                                                           | 1.05 |
| 130              | 2.60                                                        | 177.54                                                          | 176.84                                                           | 1.00 |

a)

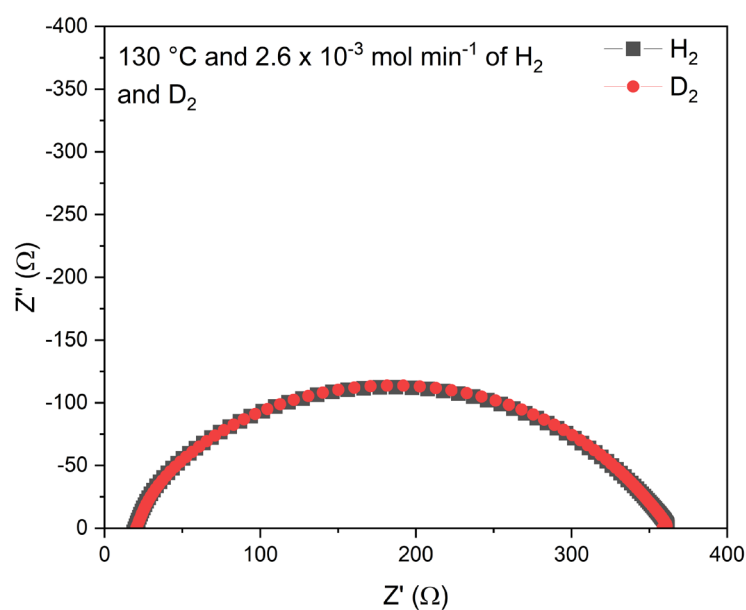

Figure S 22. (a) Nyquist plot for Pt-BTO-470 under a molar flow rate  $2.6 \times 10^{-3} \text{ mol min}^{-1}$  of H<sub>2</sub> and D<sub>2</sub> at 130 °C.

## 2.8.2 AC Conductivity Analysis: Jonscher Analysis as a Function of H<sub>2</sub> Concentration and Temperature

Table S 10. Jonscher model fit parameters (DC conductivity, A, and S) values for Pt-BTO-470 at 22 °C

| H <sub>2</sub> Concentration (%) | dc conductivity ( $\sigma_{dc}/x 10^{-6} \text{ S cm}^{-1}$ ) | A ( $x 10^{-8}$ ) | A error ( $x 10^{-9}$ ) | S    | S error ( $x 10^{-3}$ ) | R <sup>2</sup> |
|----------------------------------|---------------------------------------------------------------|-------------------|-------------------------|------|-------------------------|----------------|
| 0                                | 2.11                                                          | 1.97              | 1.33                    | 0.73 | 4.56                    | 0.9984         |
| 0.4                              | 9.61                                                          | 2.21              | 1.92                    | 0.74 | 5.91                    | 0.9974         |
| 1.04                             | 12.3                                                          | 2.31              | 1.99                    | 0.73 | 5.86                    | 0.9974         |
| 2.86                             | 13.3                                                          | 0.69              | 0.61                    | 0.80 | 5.90                    | 0.9978         |
| 4.63                             | 14.0                                                          | 0.64              | 0.58                    | 0.81 | 6.05                    | 0.9978         |
| 6.33                             | 14.3                                                          | 0.62              | 0.56                    | 0.81 | 6.09                    | 0.9977         |
| 7.97                             | 14.4                                                          | 0.49              | 0.44                    | 0.83 | 5.99                    | 0.9979         |
| 19.16                            | 14.7                                                          | 0.56              | 0.51                    | 0.82 | 6.11                    | 0.9977         |

Table S 11. Jonscher model fit parameters (DC conductivity, A, and S) values for Pt-BTO-470 at 80 °C

| H <sub>2</sub> Concentration (%) | dc conductivity ( $\sigma_{dc}/x 10^{-6} \text{ S cm}^{-1}$ ) | A ( $x 10^{-9}$ ) | A error ( $x 10^{-11}$ ) | S    | S error ( $x 10^{-3}$ ) | R <sup>2</sup> |
|----------------------------------|---------------------------------------------------------------|-------------------|--------------------------|------|-------------------------|----------------|
| 0                                | 6.18                                                          | 1.02              | 4.02                     | 0.93 | 2.75                    | 0.9997         |
| 0.4                              | 43.5                                                          | 0.78              | 6.28                     | 0.98 | 5.57                    | 0.9988         |
| 1.04                             | 47.0                                                          | 0.71              | 5.89                     | 0.99 | 5.76                    | 0.9987         |
| 2.86                             | 52.4                                                          | 0.65              | 5.49                     | 1.00 | 5.91                    | 0.9987         |
| 4.63                             | 55.0                                                          | 0.61              | 5.21                     | 1.00 | 5.95                    | 0.9987         |
| 6.33                             | 56.4                                                          | 0.60              | 5.19                     | 1.00 | 6.01                    | 0.9986         |
| 7.97                             | 58.8                                                          | 0.41              | 4.32                     | 1.02 | 7.33                    | 0.9981         |
| 19.16                            | 60.7                                                          | 0.39              | 4.17                     | 1.02 | 7.29                    | 0.9981         |

Table S 12. Jonscher model fit parameters (DC conductivity, A, and S) values for Pt-BTO-470 at 100 °C

| H <sub>2</sub> Concentration (%) | dc conductivity ( $\sigma_{dc}/x 10^{-6} S cm^{-1}$ ) | A ( $x 10^{-9}$ ) | A error ( $x 10^{-11}$ ) | S    | S error ( $x 10^{-3}$ ) | R <sup>2</sup> |
|----------------------------------|-------------------------------------------------------|-------------------|--------------------------|------|-------------------------|----------------|
| 0                                | 8.67                                                  | 1.80              | 19.0                     | 0.90 | 7.16                    | 0.9975         |
| 0.4                              | 93.06                                                 | 0.80              | 7.7                      | 0.99 | 6.62                    | 0.9983         |
| 1.04                             | 127.5                                                 | 0.84              | 8.1                      | 0.99 | 6.56                    | 0.9983         |
| 2.86                             | 139.4                                                 | 0.82              | 7.6                      | 0.99 | 6.34                    | 0.9984         |
| 4.63                             | 155.6                                                 | 0.61              | 4.4                      | 1.01 | 4.94                    | 0.9991         |
| 6.33                             | 165.6                                                 | 0.96              | 8.8                      | 0.98 | 6.29                    | 0.9984         |
| 7.97                             | 172.5                                                 | 0.97              | 8.9                      | 0.98 | 6.27                    | 0.9984         |
| 19.16                            | 178.8                                                 | 0.97              | 8.9                      | 0.98 | 6.28                    | 0.9984         |

Table S 13. Jonscher model fit parameters (DC conductivity, A, and S) values for Pt-BTO-470 at 125 °C

| H <sub>2</sub> Concentration (%) | dc conductivity ( $\sigma_{dc}/x 10^{-6} S cm^{-1}$ ) | A ( $x 10^{-9}$ ) | A error ( $x 10^{-11}$ ) | S    | S error ( $x 10^{-3}$ ) | R <sup>2</sup> |
|----------------------------------|-------------------------------------------------------|-------------------|--------------------------|------|-------------------------|----------------|
| 0                                | 10.91                                                 | 3.10              | 33.3                     | 0.89 | 7.38                    | 0.9973         |
| 0.4                              | 179.1                                                 | 0.56              | 4.0                      | 1.05 | 5.00                    | 0.9992         |
| 1.04                             | 215.9                                                 | 0.69              | 4.9                      | 1.04 | 4.99                    | 0.9991         |
| 2.86                             | 268.8                                                 | 2.28              | 14.7                     | 0.95 | 4.48                    | 0.9991         |
| 4.63                             | 340.6                                                 | 3.23              | 21.0                     | 0.92 | 4.53                    | 0.9991         |
| 6.33                             | 373.9                                                 | 3.63              | 22.9                     | 0.92 | 4.40                    | 0.9991         |
| 7.97                             | 398.0                                                 | 3.29              | 17.3                     | 0.92 | 3.69                    | 0.9994         |
| 19.16                            | 420.1                                                 | 3.34              | 16.6                     | 0.92 | 3.48                    | 0.9995         |

Table S 14. Jonscher model fit parameters (DC conductivity, A, and S) values for Pt-BTO-470 at 150 °C

| H <sub>2</sub> Concentration (%) | dc conductivity ( $\sigma_{dc}/x 10^{-6} S cm^{-1}$ ) | A ( $x 10^{-9}$ ) | A error ( $x 10^{-11}$ ) | S    | S error ( $x 10^{-3}$ ) | R <sup>2</sup> |
|----------------------------------|-------------------------------------------------------|-------------------|--------------------------|------|-------------------------|----------------|
| 0                                | 15.7                                                  | 4.28              | 49.6                     | 0.88 | 7.94                    | 0.9968         |
| 0.4                              | 284.4                                                 | 1.36              | 10.9                     | 0.98 | 5.57                    | 0.9988         |
| 1.04                             | 468.8                                                 | 2.87              | 17.6                     | 0.94 | 4.28                    | 0.9992         |
| 2.86                             | 557.9                                                 | 3.60              | 21.1                     | 0.92 | 4.11                    | 0.9992         |
| 4.63                             | 604.0                                                 | 3.9               | 23.4                     | 0.92 | 4.17                    | 0.9992         |
| 6.33                             | 619.3                                                 | 2.72              | 11.9                     | 0.94 | 3.09                    | 0.9996         |
| 7.97                             | 642.5                                                 | 3.13              | 13.5                     | 0.93 | 3.04                    | 0.9996         |
| 19.16                            | 649.9                                                 | 3.19              | 14.0                     | 0.93 | 3.10                    | 0.9996         |



Table S 15. Jonscher model fit parameters (DC conductivity, A, and S) values for Pt-BTO-470 at 175 °C

| H <sub>2</sub> Concentration (%) | dc conductivity ( $\sigma_{dc}/x 10^{-6} S cm^{-1}$ ) | A ( $x 10^{-9}$ ) | A error ( $x 10^{-11}$ ) | S    | S error ( $x 10^{-3}$ ) | R <sup>2</sup> |
|----------------------------------|-------------------------------------------------------|-------------------|--------------------------|------|-------------------------|----------------|
| 0                                | 19.1                                                  | 4.61              | 50.5                     | 0.85 | 7.58                    | 0.9969         |
| 0.4                              | 683.3                                                 | 4.27              | 18.4                     | 0.91 | 3.05                    | 0.9996         |
| 1.04                             | 785.4                                                 | 4.51              | 21.1                     | 0.91 | 3.31                    | 0.9995         |
| 2.86                             | 925.9                                                 | 4.95              | 28.5                     | 0.90 | 4.07                    | 0.9992         |
| 4.63                             | 1030.0                                                | 5.19              | 34.5                     | 0.90 | 4.69                    | 0.9990         |
| 6.33                             | 1080.0                                                | 5.88              | 39.7                     | 0.89 | 4.78                    | 0.9989         |
| 7.97                             | 1110.0                                                | 5.05              | 36.9                     | 0.90 | 5.18                    | 0.9987         |
| 19.16                            | 1140.0                                                | 4.93              | 36.2                     | 0.90 | 5.19                    | 0.9987         |

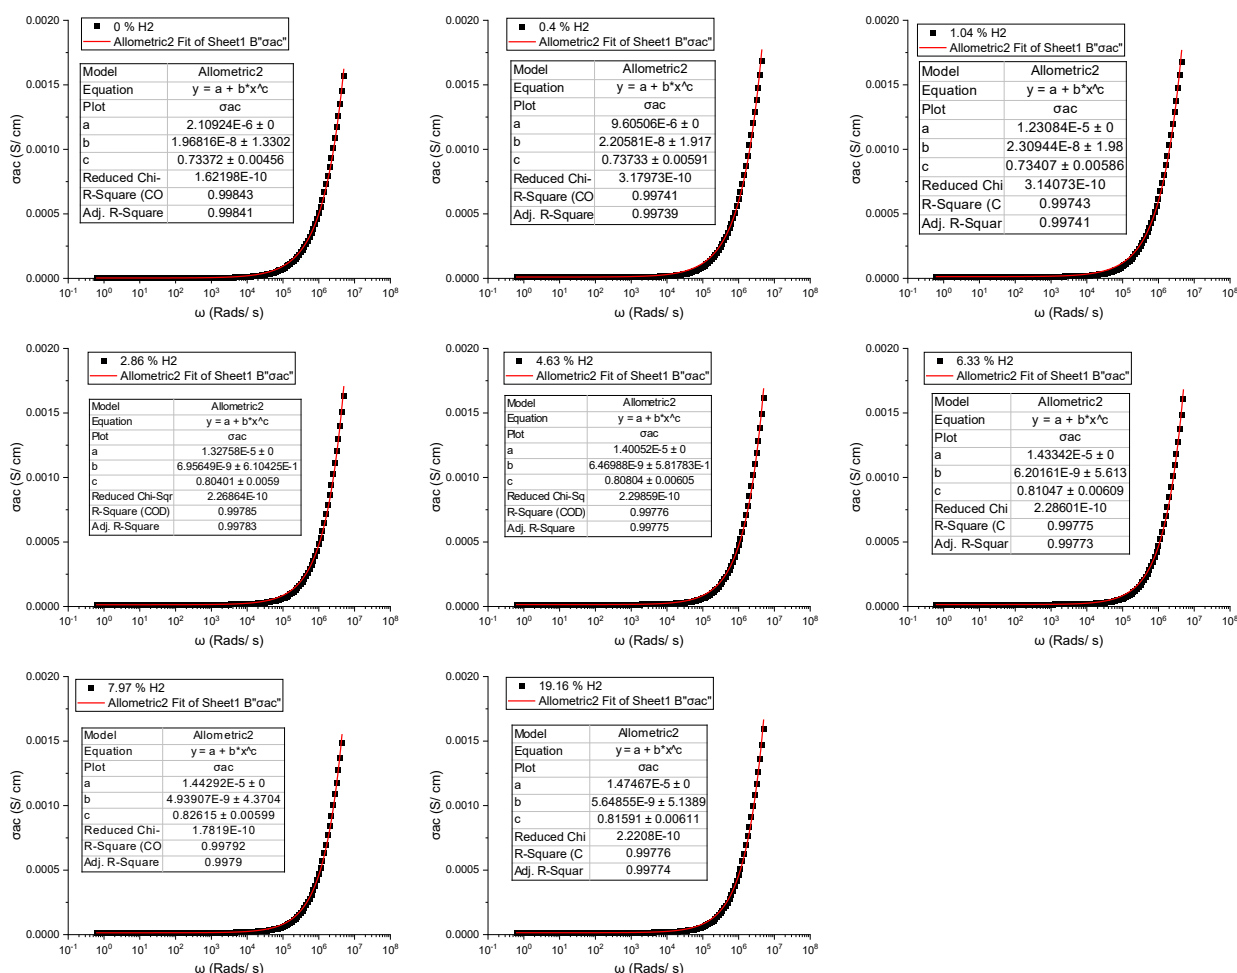

Figure S 23. Jonscher model fits to AC conductivity data for Pt-BTO-470 at 22 °C for 0% to 19% H<sub>2</sub> in N<sub>2</sub>.

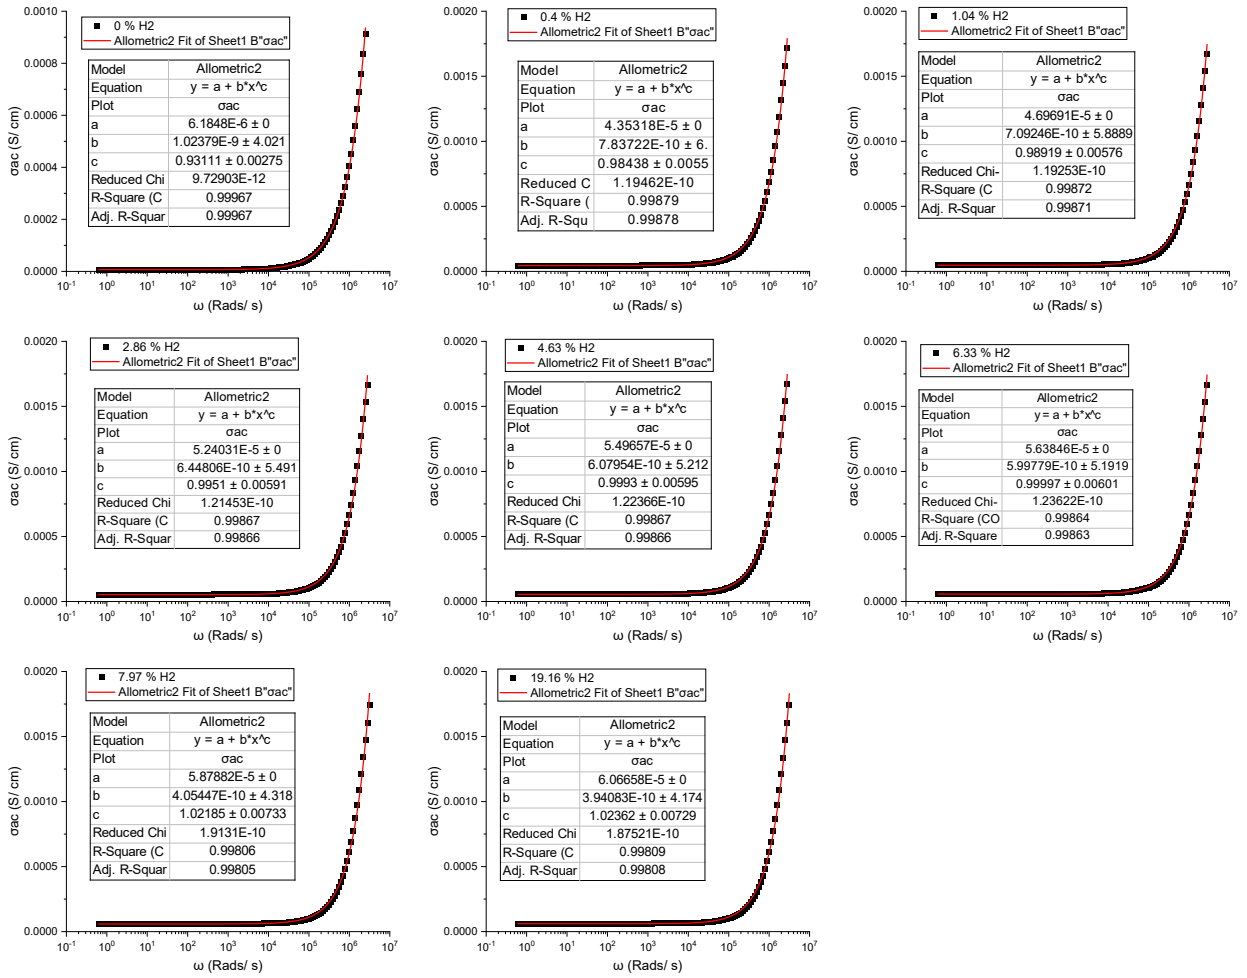

Figure S 24. Jonscher model fits to AC conductivity data for Pt-BTO-470 at 80 °C for 0% to 19% H<sub>2</sub> in N<sub>2</sub>.

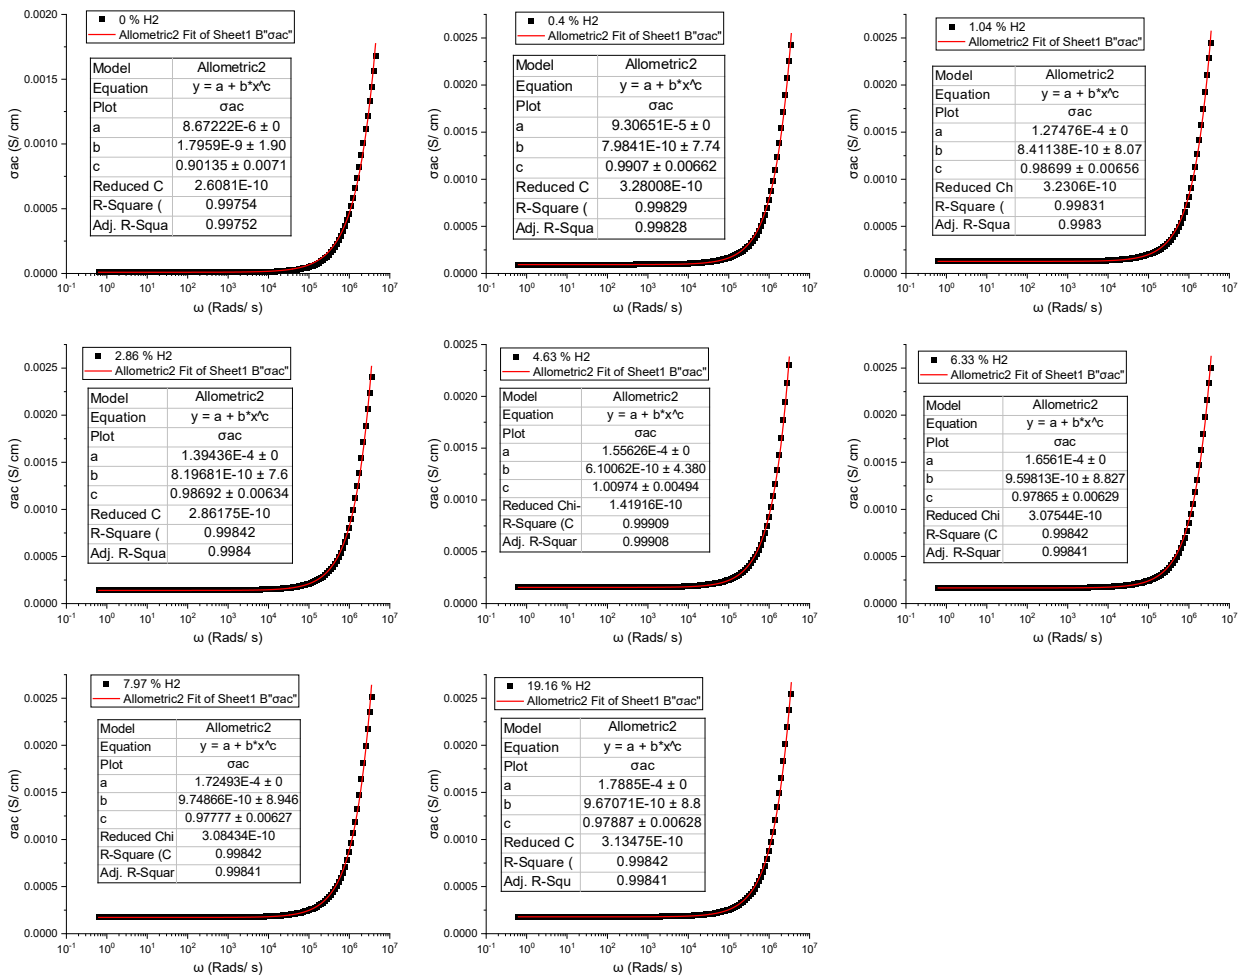

Figure S 25. Jonscher model fits to AC conductivity data for Pt-BTO-470 at 100 °C for 0% to 19%  $H_2$  in  $N_2$ .

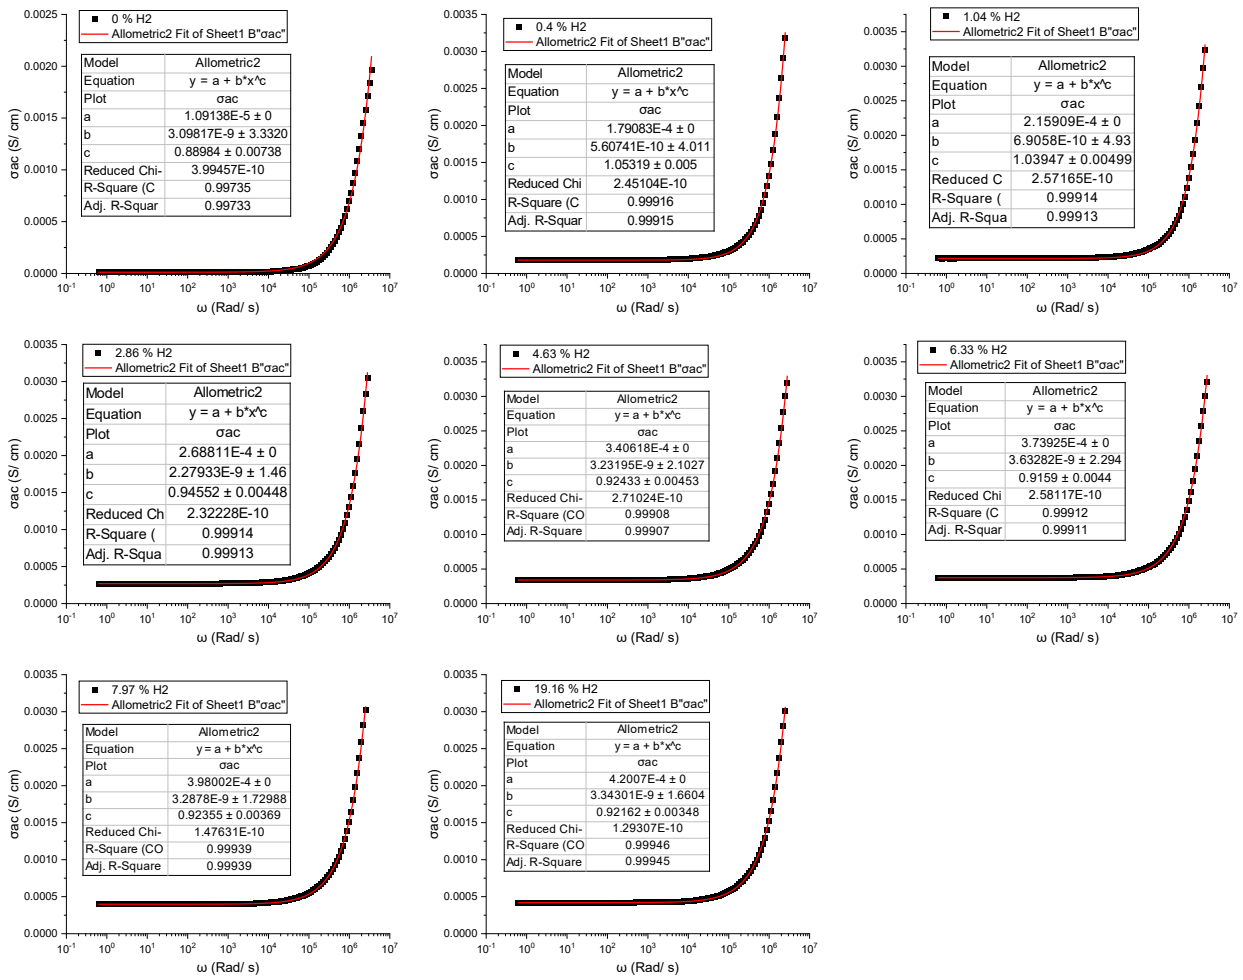

Figure S 26. Jonscher model fits to AC conductivity data for Pt-BTO-470 at 125 °C for 0% to 19%  $H_2$  in  $N_2$ .

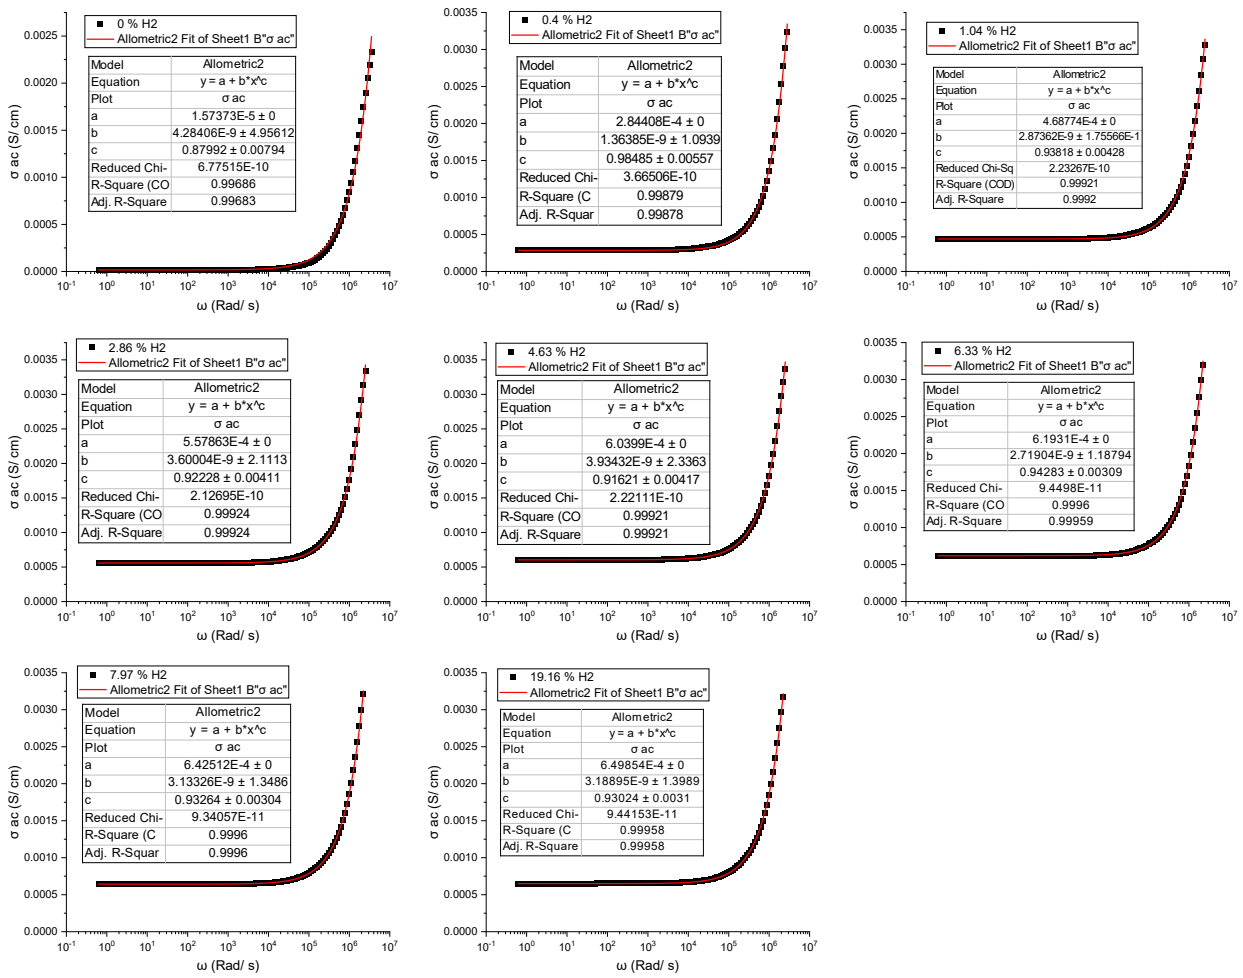

Figure S 27. Jonscher model fits to AC conductivity data for Pt-BTO-470 at 150 °C for 0% to 19% H<sub>2</sub> in N<sub>2</sub>.

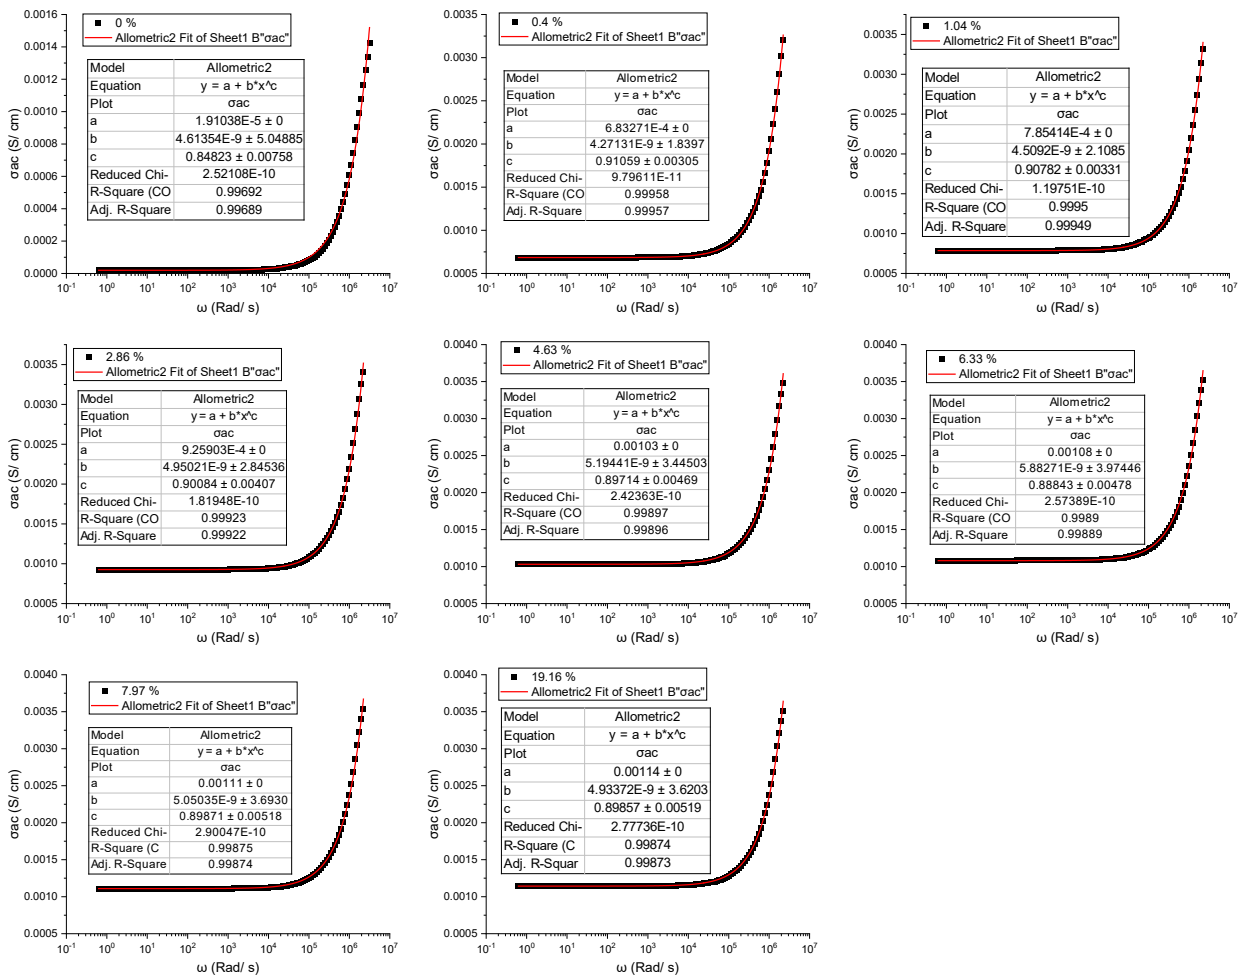

Figure S 28. Jonscher model fit to AC conductivity data for Pt-BTO-470 at 175 °C for 0% to 19% H<sub>2</sub> in N<sub>2</sub>.

### 2.8.3 Langmuir Conductivity Model

Table S 16. Parameters derived from fitting of the Langmuir conductivity model: conductivity at 0% H<sub>2</sub> concentration, the parameter (A), and the Langmuir equilibrium constant (K<sub>eq</sub>).

| T (°C) | T (K)  | 1000/ T | A (x 10 <sup>-5</sup> S cm <sup>-1</sup> ) | K (Atm <sup>-1</sup> ) | ln(K) | R <sup>2</sup> |
|--------|--------|---------|--------------------------------------------|------------------------|-------|----------------|
| 22     | 295.15 | 3.388   | 1.91                                       | 83.34                  | 4.42  | 0.95064        |
| 80     | 353.15 | 2.832   | 7.27                                       | 114.62                 | 4.74  | 0.97657        |
| 100    | 373.15 | 2.680   | 24.68                                      | 11.80                  | 2.47  | 0.98598        |
| 125    | 398.15 | 2.512   | 99.77                                      | 0.31                   | -1.18 | 0.97271        |
| 150    | 423.15 | 2.363   | 94.54                                      | 8.48                   | 2.14  | 0.96154        |
| 175    | 448.15 | 2.231   | 146.00                                     | 20.25                  | 3.01  | 0.99423        |

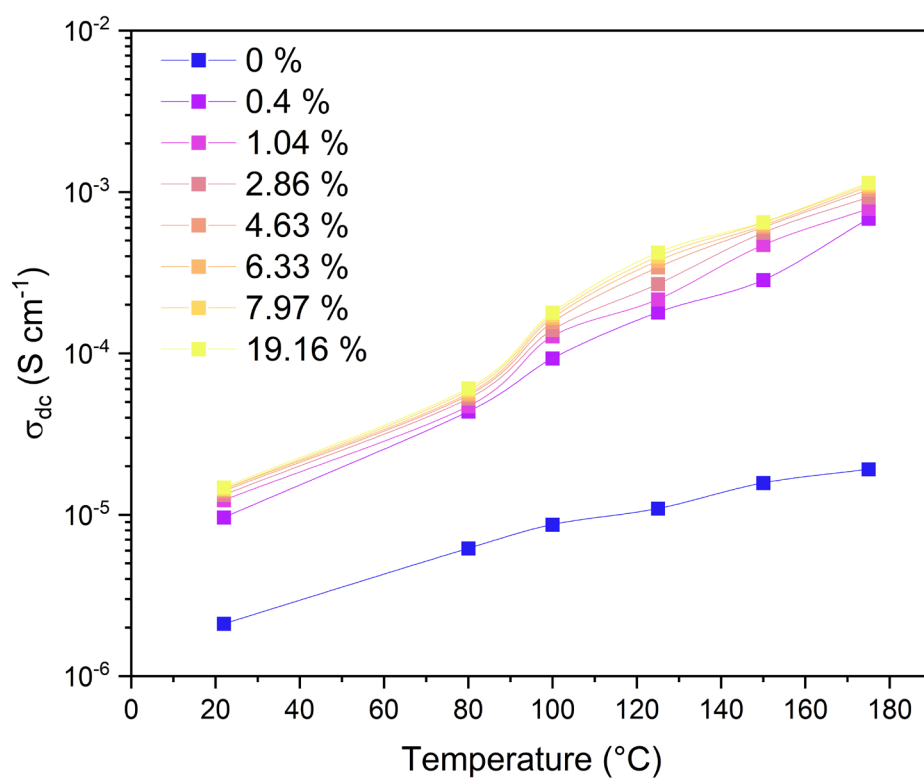

Figure S 29. Plot of DC conductivity (derived from Jonscher fit) vs. temperature for Pt-BTO-470 for 0% to 19% H<sub>2</sub> in N<sub>2</sub>.

## 2.8.4 Charge Transport Mechanism from Jonscher Model S Parameter (S vs. T)

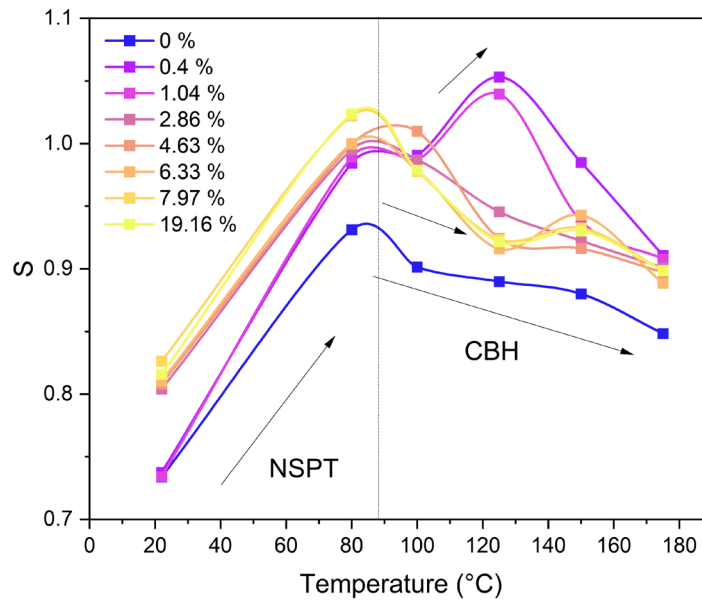

Figure S 30. Plot of Jonscher model S exponent vs. the measurement temperature (°C) and for H<sub>2</sub> + N<sub>2</sub> mixtures from 0 to 19% H<sub>2</sub> for Pt-BTO-470. Below 80 °C, the non-overlapping small polaron tunnelling model (NSPT) is the dominant charge transport mechanism, while above 80 °C, this changes to a mixture of correlated barrier hopping (CBH) and small polaron transport (NSPT) depending on the H<sub>2</sub> concentration. This change coincides with the ferroelectric to paraelectric phase transition temperature region for spark plasma sintered BaTiO<sub>3</sub>.



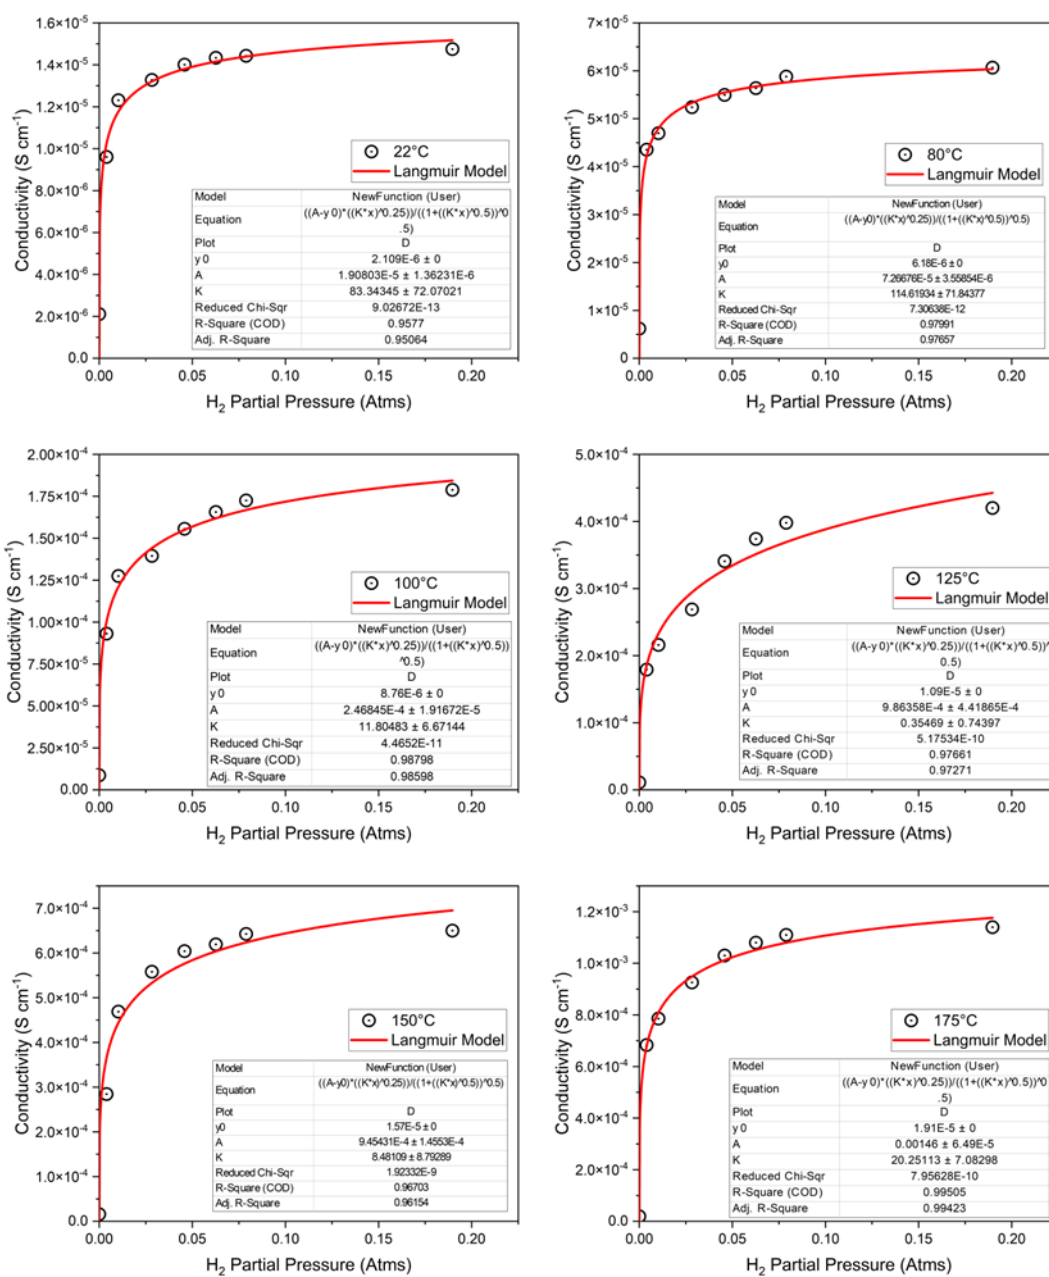

Figure S 31. Plots of conductivity (S cm<sup>-1</sup>) vs. H<sub>2</sub> pressure (Atms) for Pt-BTO-470 for electrical measurements performed at 22 °C, 80 °C, 100 °C, 125 °C, 150 °C, and 175 °C, and fitting of Langmuir conductivity model to experimental data. Fitting parameters and statistics are shown as insets.

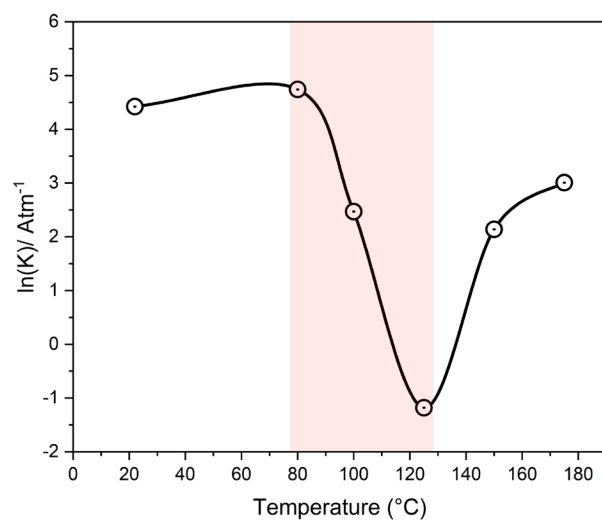

Figure S 32. Plot of the Langmuir equilibrium constant ( $K_{eq}$ ) derived from Langmuir model fitting vs. the impedance measurement temperature. Plot shows a decrease in  $K_{eq}$  in the BaTiO<sub>3</sub> Curie temperature ( $T_C$ ) region (100 – 120 °C).

## 2.8.5 Capacitance Measurements and Colossal Relative Permittivity ( $\epsilon_r$ )

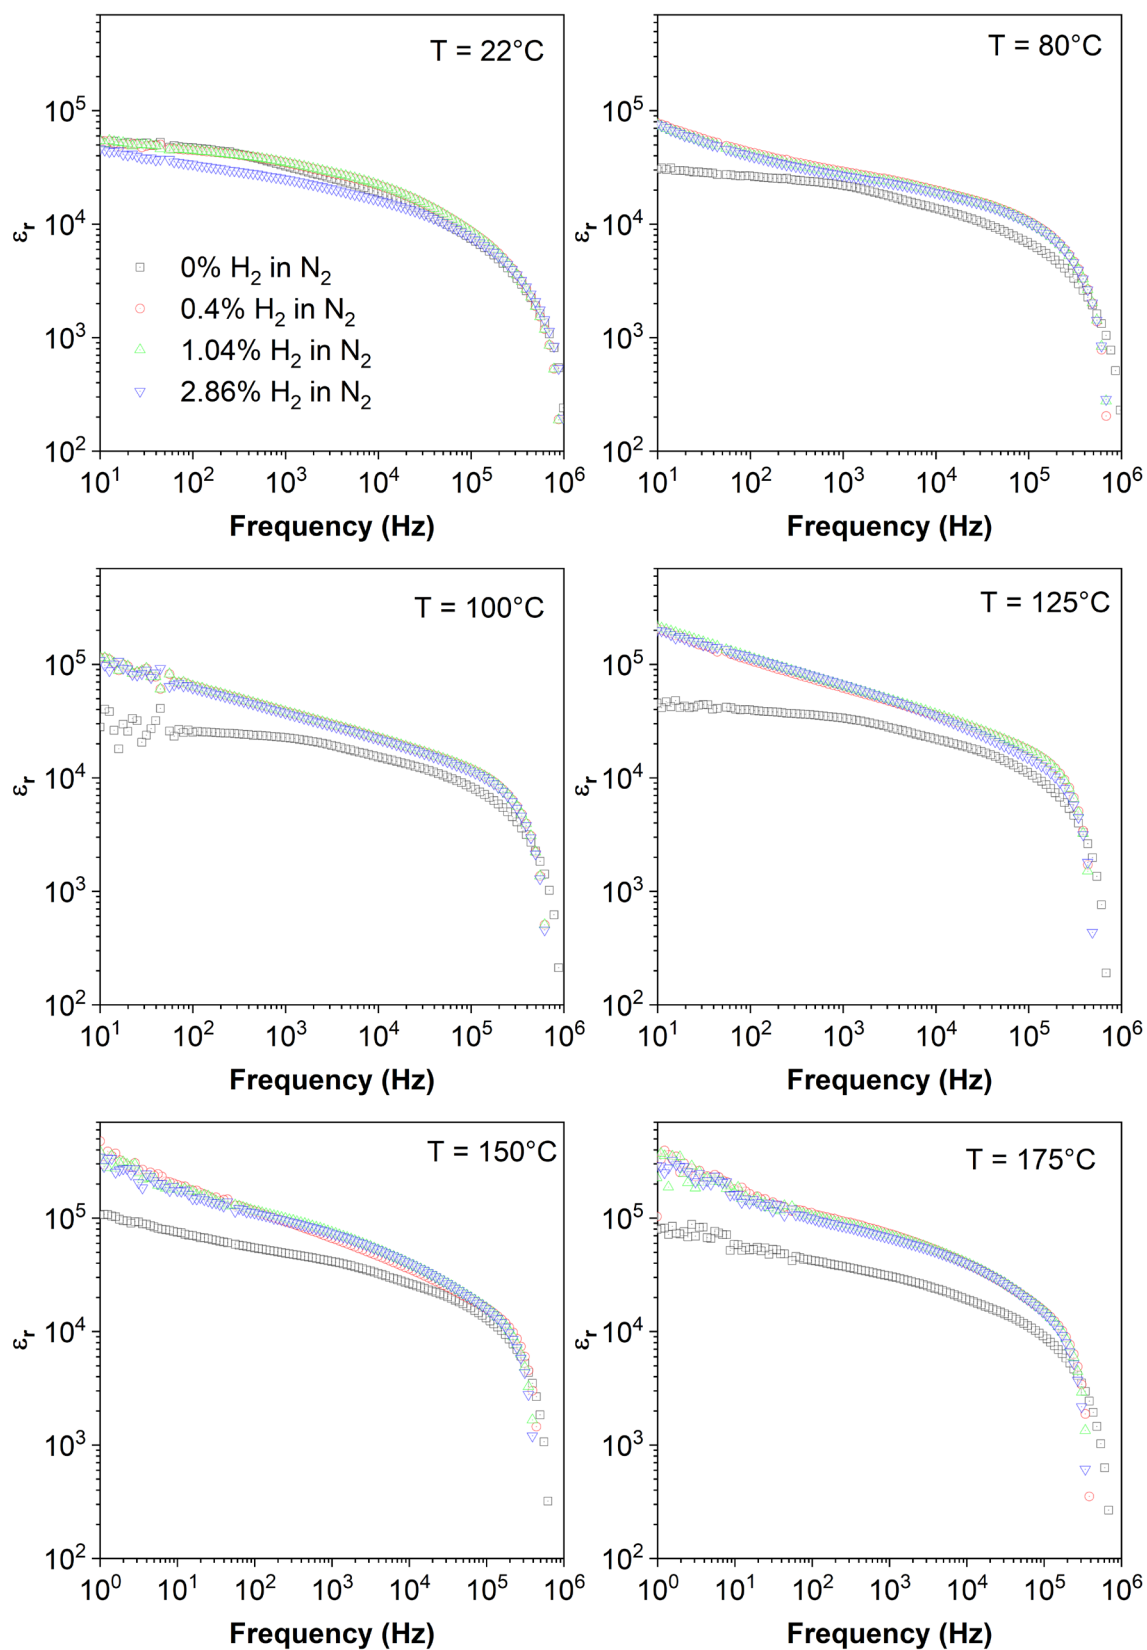

Figure S 33. Relative permittivity vs. frequency for increasing H<sub>2</sub> concentration (0 – 2.9%) and from 22 °C to 175 °C for Pt-BTO-470

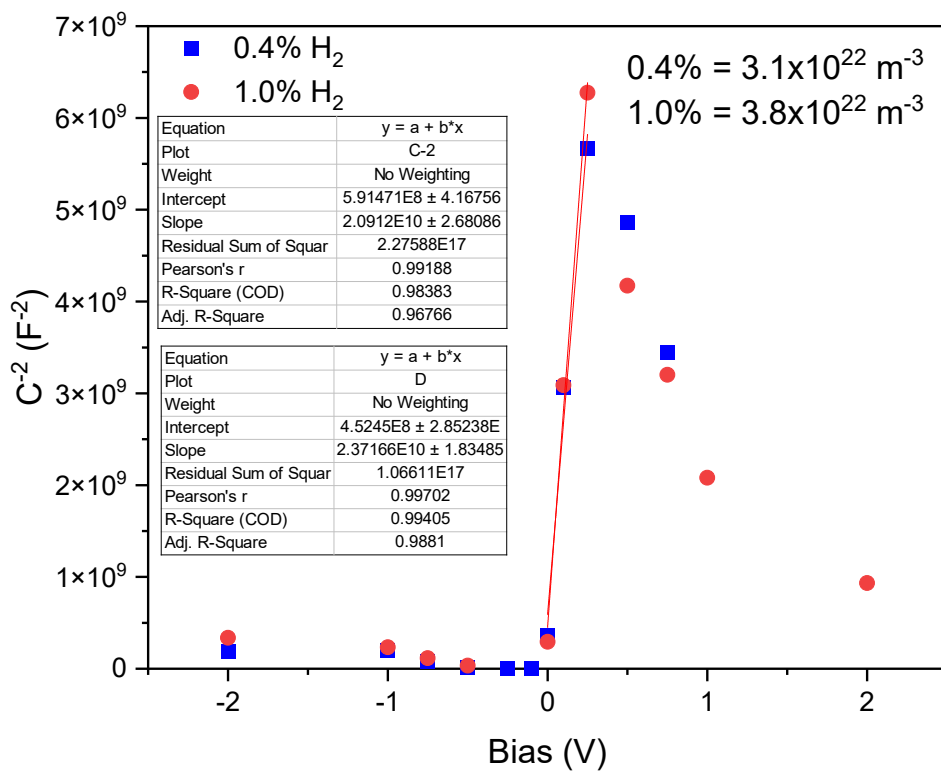

Figure S 34. Mott-Schottky plot for the BaTiO<sub>3</sub>-Pt interface region at 22 °C under 0.4% and 1.0% H<sub>2</sub>.

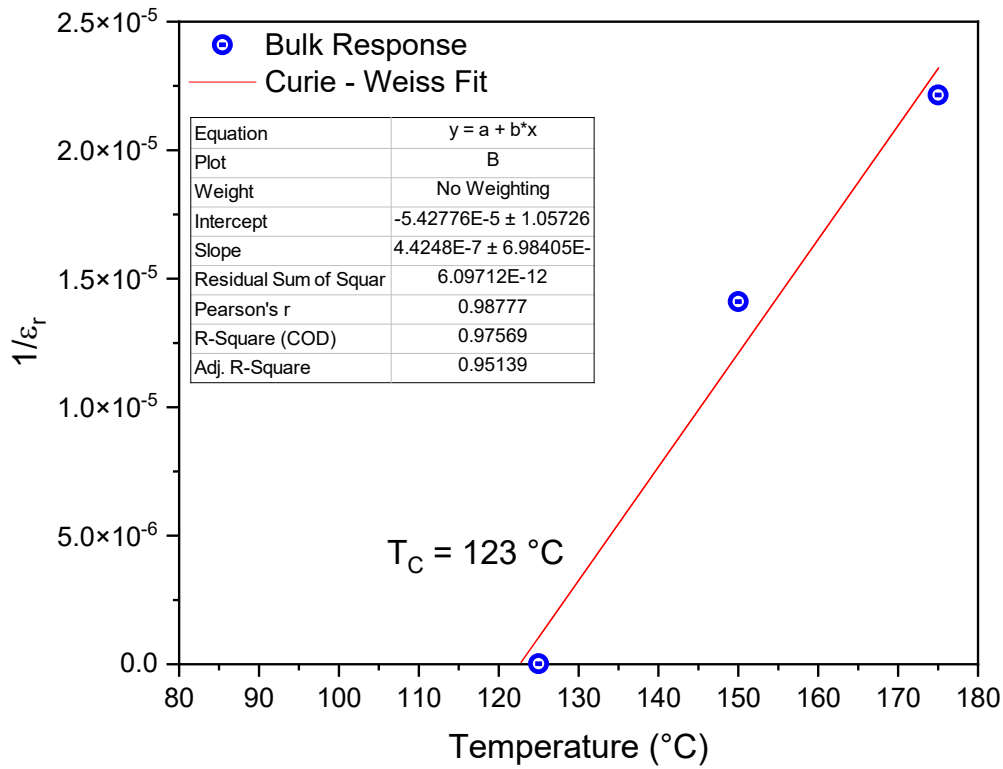

Figure S 35. Curie-Weiss plot for bulk BTO-470 under N<sub>2</sub>. Calculated from the capacitance derived from the DRT fitting.

### 2.8.6 Distribution of Relaxation Times Analysis (DRT)

a)

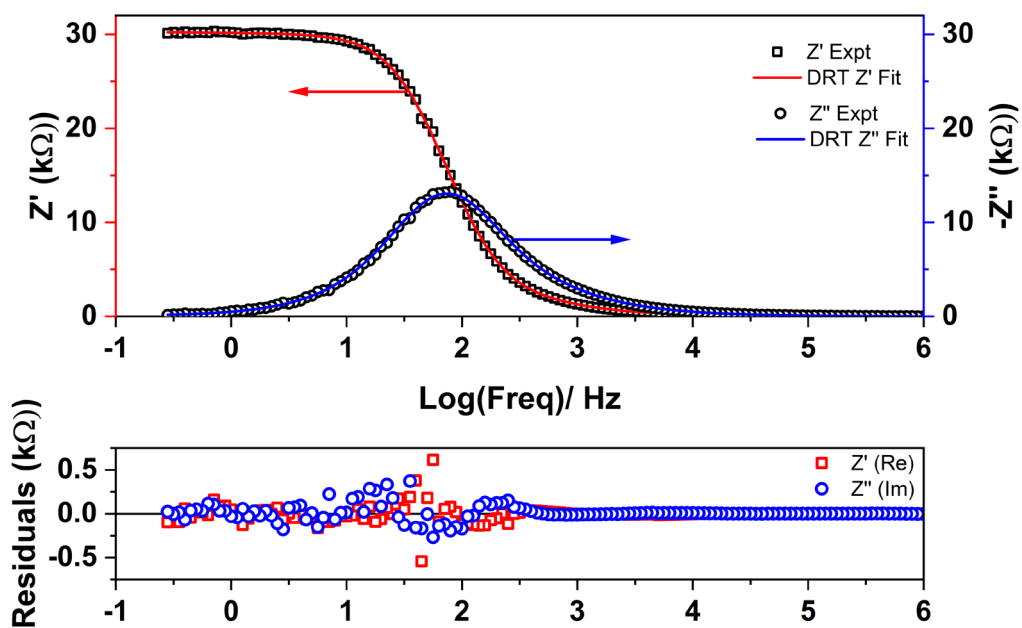

b)

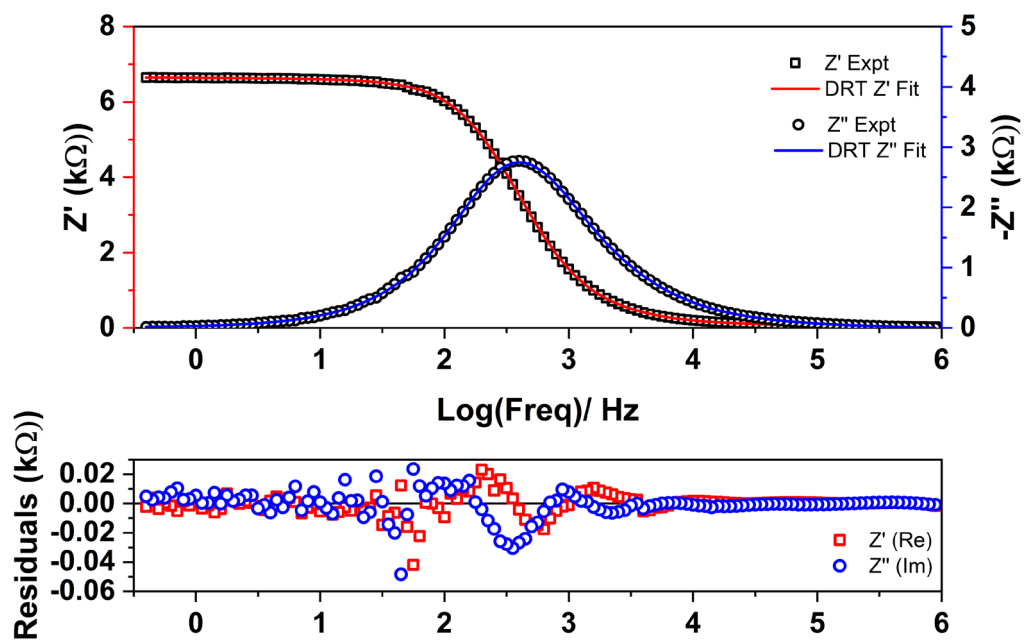

Figure S 36. Spectroscopic plots of experimental  $Z'$  and  $Z''$  vs. frequency data and the fitting of the DRT model, with the corresponding residual data, for Pt-BTO-470 at 22 °C and under (a) pure  $N_2$  and (b) 0.4%  $H_2$  in  $N_2$ .

### **Gauss Deconvolution of DRT Spectra to Quantify the Resistance Contribution of Each Electroactive Component**

Table S 17. Gauss deconvolution of the DRT spectra for pure N<sub>2</sub> (0 % H<sub>2</sub>)

Peak 1 (P1) – Electrode

| Temperature | X <sub>c</sub> of P1     | w     | Area   | Area*2.303 | Sigma | FWHM  | Height  | Total R <sup>2</sup><br>Adjust for P1,<br>P2, and P3 | Total R for<br>P1 + P2 + P3 |
|-------------|--------------------------|-------|--------|------------|-------|-------|---------|------------------------------------------------------|-----------------------------|
| (°C)        | Log <sub>10</sub> (T)/ s |       |        |            |       |       |         |                                                      |                             |
| 22          | -1.508                   | 0.126 | 57.519 | 132.466    | 0.063 | 0.148 | 364.233 | 0.9940                                               | 30481.8                     |
| 80          | -2.292                   | 0.195 | 30.668 | 70.628     | 0.097 | 0.229 | 125.773 | 0.9938                                               | 10347.7                     |
| 100         | -2.446                   | 0.116 | 41.064 | 94.570     | 0.058 | 0.136 | 282.883 | 0.9935                                               | 7417.4                      |
| 125         | -2.443                   | 0.154 | 25.168 | 57.962     | 0.077 | 0.182 | 130.126 | 0.9938                                               | 5893.9                      |
| 150         | -2.526                   | 0.301 | 54.911 | 126.461    | 0.150 | 0.354 | 145.569 | 0.9978                                               | 4002.8                      |
| 175         | -2.738                   | 0.383 | 49.955 | 115.047    | 0.192 | 0.451 | 103.960 | 0.9996                                               | 3249.4                      |

Peak 2(P2) – Grain Boundary

| Temperature | X <sub>c</sub> of P2     | w     | Area      | Area*2.303 | Sigma | FWHM  | Height    |
|-------------|--------------------------|-------|-----------|------------|-------|-------|-----------|
| (°C)        | Log <sub>10</sub> (T)/ s |       |           |            |       |       |           |
| 22          | -2.664                   | 0.422 | 12594.034 | 29004.060  | 0.211 | 0.497 | 23799.809 |
| 80          | -3.431                   | 0.424 | 4210.324  | 9696.375   | 0.212 | 0.500 | 7915.324  |
| 100         | -3.597                   | 0.410 | 3018.840  | 6952.388   | 0.205 | 0.482 | 5878.376  |
| 125         | -3.512                   | 0.409 | 2396.594  | 5519.356   | 0.204 | 0.481 | 4678.908  |
| 150         | -3.584                   | 0.476 | 1575.153  | 3627.577   | 0.238 | 0.561 | 2638.068  |
| 175         | -3.811                   | 0.519 | 1257.173  | 2895.269   | 0.259 | 0.611 | 1933.115  |

Peak 3 (P3) - Bulk

| Temperature | X <sub>c</sub> of P3     | w     | Area    | Area*2.303 | Sigma | FWHM  | Height   |
|-------------|--------------------------|-------|---------|------------|-------|-------|----------|
| (°C)        | Log <sub>10</sub> (T)/ s |       |         |            |       |       |          |
| 22          | -3.747                   | 0.269 | 584.153 | 1345.305   | 0.135 | 0.317 | 1730.596 |
| 80          | -4.483                   | 0.285 | 252.132 | 580.661    | 0.142 | 0.335 | 706.650  |
| 100         | -4.655                   | 0.243 | 160.845 | 370.425    | 0.122 | 0.287 | 527.388  |
| 125         | -4.574                   | 0.260 | 137.479 | 316.615    | 0.130 | 0.306 | 422.520  |
| 150         | -4.613                   | 0.324 | 108.023 | 248.777    | 0.162 | 0.381 | 266.422  |
| 175         | -4.807                   | 0.382 | 103.820 | 239.098    | 0.191 | 0.450 | 216.705  |

Table S 18. Gauss deconvolution of DRT spectra for 0.4% H<sub>2</sub> in N<sub>2</sub>

Peak 1 (P1) – Electrode

| Temperature | X <sub>c</sub> of P1     | w     | Area   | Area*2.303 | Sigma | FWHM  | Height  | Total R2 Adjust for P1, P2, and P3 | Total R for P1 + P2 + P3 |
|-------------|--------------------------|-------|--------|------------|-------|-------|---------|------------------------------------|--------------------------|
| (°C)        | Log <sub>10</sub> (T)/ s |       |        |            |       |       |         |                                    |                          |
| 22          | -2.322                   | 0.158 | 39.354 | 90.633     | 0.079 | 0.185 | 199.370 | 0.9952                             | 6574.7                   |
| 80          | -3.200                   | 0.332 | 24.569 | 56.582     | 0.166 | 0.391 | 59.025  | 0.9993                             | 1369.1                   |
| 100         | -3.576                   | 0.750 | 24.135 | 55.583     | 0.375 | 0.883 | 25.676  | 0.9998                             | 624.9                    |
| 125         | -3.645                   | 0.626 | 9.947  | 22.908     | 0.313 | 0.737 | 12.676  | 0.9999                             | 329.6                    |
| 150         | -4.053                   | 0.697 | 9.208  | 21.207     | 0.348 | 0.820 | 10.547  | 0.9999                             | 200.9                    |
| 175         | -4.266                   | 0.730 | 3.029  | 6.976      | 0.365 | 0.859 | 3.313   | 0.9992                             | 75.2                     |

Peak 2 (P2) – Grain Boundary

| Temperature | X <sub>c</sub> of P2     | w     | Area     | Area*2.303 | Sigma | FWHM  | Height   |
|-------------|--------------------------|-------|----------|------------|-------|-------|----------|
| (°C)        | Log <sub>10</sub> (T)/ s |       |          |            |       |       |          |
| 22          | -3.386                   | 0.462 | 2636.068 | 6070.864   | 0.231 | 0.544 | 4554.253 |
| 80          | -4.255                   | 0.530 | 528.127  | 1216.276   | 0.265 | 0.624 | 795.654  |
| 100         | -4.539                   | 0.649 | 215.731  | 496.829    | 0.324 | 0.764 | 265.273  |
| 125         | -4.650                   | 0.696 | 119.606  | 275.453    | 0.348 | 0.819 | 137.191  |
| 150         | -4.882                   | 0.703 | 66.040   | 152.090    | 0.351 | 0.828 | 74.968   |
| 175         | -5.087                   | 0.610 | 18.212   | 41.942     | 0.305 | 0.719 | 23.806   |

Peak 3 (P3) - Bulk

| Temperature | X <sub>c</sub> of P3     | w     | Area    | Area*2.303 | Sigma | FWHM  | Height  |
|-------------|--------------------------|-------|---------|------------|-------|-------|---------|
| (°C)        | Log <sub>10</sub> (T)/ s |       |         |            |       |       |         |
| 22          | -4.329                   | 0.380 | 179.433 | 413.235    | 0.190 | 0.447 | 376.905 |
| 80          | -5.069                   | 0.383 | 41.802  | 96.271     | 0.191 | 0.451 | 87.117  |
| 100         | -5.105                   | 0.509 | 31.473  | 72.483     | 0.254 | 0.599 | 49.377  |
| 125         | -5.558                   | 0.500 | 13.560  | 31.228     | 0.250 | 0.588 | 21.659  |
| 150         | -5.702                   | 0.461 | 12.004  | 27.644     | 0.230 | 0.543 | 20.777  |
| 175         | -5.757                   | 0.550 | 11.408  | 26.272     | 0.275 | 0.647 | 16.560  |



Table S 19. Gauss deconvolution of DRT spectra for 1.04% H<sub>2</sub> in N<sub>2</sub>

Peak 1 (P1) – Electrode

| Temperature | X <sub>c</sub> of P1     | w      | Area  | Area*2.303 | Sigma  | FWHM  | Height | Total R2 Adjust for P1, P2, and P3 | Total R for P1 + P2 + P3 |
|-------------|--------------------------|--------|-------|------------|--------|-------|--------|------------------------------------|--------------------------|
| (°C)        | Log <sub>10</sub> (T)/ s |        |       |            |        |       |        |                                    |                          |
| 22          | 22                       | -2.354 | 0.250 | 31.660     | 72.912 | 0.125 | 0.294  | 0.9965                             | 5071.7                   |
| 80          | 80                       | -3.272 | 0.337 | 21.043     | 48.461 | 0.168 | 0.396  | 0.9974                             | 1266.2                   |
| 100         | 100                      | -3.738 | 0.750 | 16.359     | 37.674 | 0.375 | 0.883  | 0.9997                             | 444.6                    |
| 125         | 125                      | -3.756 | 0.780 | 10.882     | 25.062 | 0.390 | 0.918  | 0.9994                             | 272.0                    |
| 150         | 150                      | -4.224 | 0.780 | 6.466      | 14.892 | 0.390 | 0.918  | 0.9998                             | 117.2                    |
| 175         | 175                      | -4.342 | 0.774 | 2.297      | 5.289  | 0.387 | 0.911  | 0.9998                             | 63.8                     |

Peak 2 (P2) – Grain Boundary

| Temperature | X <sub>c</sub> of P2     | w     | Area     | Area*2.303 | Sigma | FWHM  | Height   |
|-------------|--------------------------|-------|----------|------------|-------|-------|----------|
| (°C)        | Log <sub>10</sub> (T)/ s |       |          |            |       |       |          |
| 22          | -3.515                   | 0.480 | 2022.362 | 4657.500   | 0.240 | 0.566 | 3359.085 |
| 80          | -4.315                   | 0.517 | 489.523  | 1127.372   | 0.258 | 0.609 | 755.545  |
| 100         | -4.722                   | 0.710 | 169.393  | 390.113    | 0.355 | 0.836 | 190.430  |
| 125         | -4.744                   | 0.705 | 96.172   | 221.483    | 0.352 | 0.830 | 108.915  |
| 150         | -5.014                   | 0.658 | 32.774   | 75.479     | 0.329 | 0.775 | 39.738   |
| 175         | -5.083                   | 0.565 | 13.039   | 30.029     | 0.282 | 0.665 | 18.430   |

Peak 3 (P3) - Bulk

| Temperature | X <sub>c</sub> of P3     | w     | Area    | Area*2.303 | Sigma | FWHM  | Height  |
|-------------|--------------------------|-------|---------|------------|-------|-------|---------|
| (°C)        | Log <sub>10</sub> (T)/ s |       |         |            |       |       |         |
| 22          | -4.422                   | 0.481 | 148.183 | 341.266    | 0.241 | 0.567 | 245.580 |
| 80          | -5.077                   | 0.421 | 39.245  | 90.382     | 0.211 | 0.496 | 74.318  |
| 100         | -5.129                   | 0.390 | 7.305   | 16.824     | 0.195 | 0.459 | 14.947  |
| 125         | -5.632                   | 0.465 | 11.052  | 25.452     | 0.232 | 0.547 | 18.980  |
| 150         | -5.734                   | 0.499 | 11.630  | 26.784     | 0.250 | 0.588 | 18.591  |
| 175         | -5.732                   | 0.615 | 12.369  | 28.485     | 0.308 | 0.724 | 16.039  |

Table S 20. Gauss deconvolution of DRT spectra for 2.86% H<sub>2</sub> in N<sub>2</sub>

Peak 1 (P1) – Electrode

| Temperature | X <sub>c</sub> of P1     | w     | Area   | Area*2.303 | Sigma | FWHM  | Height  | Total R2 Adjust for P1, P2, and P3 | Total R for P1 + P2 + P3 |
|-------------|--------------------------|-------|--------|------------|-------|-------|---------|------------------------------------|--------------------------|
| (°C)        | Log <sub>10</sub> (T)/ s |       |        |            |       |       |         |                                    |                          |
| 22          | -2.658                   | 0.260 | 61.398 | 141.401    | 0.130 | 0.306 | 188.244 | 0.9976                             | 4657.1                   |
| 80          | -3.319                   | 0.307 | 18.469 | 42.533     | 0.154 | 0.362 | 47.993  | 0.9969                             | 1133.7                   |
| 100         | -3.803                   | 0.650 | 13.710 | 31.573     | 0.325 | 0.765 | 16.829  | 0.9977                             | 389.5                    |
| 125         | -3.834                   | 0.780 | 7.554  | 17.398     | 0.390 | 0.918 | 7.728   | 0.9995                             | 214.1                    |
| 150         | -4.430                   | 0.928 | 6.548  | 15.080     | 0.464 | 1.093 | 5.629   | 0.9998                             | 96.3                     |
| 175         | -4.191                   | 0.534 | 0.934  | 2.152      | 0.267 | 0.629 | 1.396   | 0.9998                             | 51.5                     |

Peak 2 (P2) – Grain Boundary

| Temperature | X <sub>c</sub> of P2     | w     | Area     | Area*2.303 | Sigma | FWHM  | Height   |
|-------------|--------------------------|-------|----------|------------|-------|-------|----------|
| (°C)        | Log <sub>10</sub> (T)/ s |       |          |            |       |       |          |
| 22          | -3.726                   | 0.513 | 1818.954 | 4189.051   | 0.257 | 0.604 | 2826.924 |
| 80          | -4.372                   | 0.511 | 437.658  | 1007.925   | 0.256 | 0.602 | 682.965  |
| 100         | -4.776                   | 0.657 | 141.665  | 326.254    | 0.328 | 0.773 | 172.110  |
| 125         | -4.834                   | 0.792 | 74.860   | 172.402    | 0.396 | 0.933 | 75.369   |
| 150         | -5.060                   | 0.621 | 23.137   | 53.284     | 0.311 | 0.732 | 29.706   |
| 175         | -5.115                   | 0.592 | 11.170   | 25.724     | 0.296 | 0.697 | 15.051   |

Peak 3 (P3) - Bulk

| Temperature | X <sub>c</sub> of P3     | w     | Area    | Area*2.303 | Sigma | FWHM  | Height  |
|-------------|--------------------------|-------|---------|------------|-------|-------|---------|
| (°C)        | Log <sub>10</sub> (T)/ s |       |         |            |       |       |         |
| 22          | -4.667                   | 0.379 | 141.846 | 326.672    | 0.190 | 0.446 | 298.598 |
| 80          | -5.051                   | 0.410 | 36.129  | 83.206     | 0.205 | 0.483 | 70.310  |
| 100         | -5.122                   | 0.390 | 13.738  | 31.638     | 0.195 | 0.459 | 28.118  |
| 125         | -5.730                   | 0.435 | 10.535  | 24.262     | 0.218 | 0.512 | 19.323  |
| 150         | -5.738                   | 0.541 | 12.145  | 27.970     | 0.270 | 0.636 | 17.926  |
| 175         | -5.775                   | 0.569 | 10.236  | 23.574     | 0.284 | 0.670 | 14.355  |

Table S 21. Gauss deconvolution of DRT spectra for 4.63% H<sub>2</sub> in N<sub>2</sub>

Peak 1 (P1) – Electrode

| Temperature | X <sub>c</sub> of P1     | w      | Area  | Area*2.303 | Sigma   | FWHM  | Height | Total R2 Adjust for P1, P2, and P3 | Total R for P1 + P2 + P3 |
|-------------|--------------------------|--------|-------|------------|---------|-------|--------|------------------------------------|--------------------------|
| (°C)        | Log <sub>10</sub> (T)/ s |        |       |            |         |       |        |                                    |                          |
| 22          | 22                       | -2.707 | 0.308 | 51.012     | 117.481 | 0.154 | 0.362  | 0.9982                             | 4394.0                   |
| 80          | 80                       | -3.344 | 0.292 | 18.547     | 42.713  | 0.146 | 0.343  | 0.9966                             | 1081.6                   |
| 100         | 100                      | -3.883 | 0.650 | 13.430     | 30.930  | 0.325 | 0.765  | 0.9992                             | 345.2                    |
| 125         | 125                      | -3.917 | 0.780 | 5.335      | 12.287  | 0.390 | 0.918  | 0.9996                             | 166.2                    |
| 150         | 150                      | -4.504 | 0.962 | 6.119      | 14.093  | 0.481 | 1.133  | 0.9998                             | 87.5                     |
| 175         | 175                      | -4.159 | 0.461 | 0.641      | 1.477   | 0.231 | 0.543  | 0.9999                             | 44.7                     |

Peak 2 (P2) – Grain Boundary

| Temperature | X <sub>c</sub> of P2     | w     | Area     | Area*2.303 | Sigma | FWHM  | Height   |
|-------------|--------------------------|-------|----------|------------|-------|-------|----------|
| (°C)        | Log <sub>10</sub> (T)/ s |       |          |            |       |       |          |
| 22          | -3.773                   | 0.505 | 1723.709 | 3969.702   | 0.252 | 0.594 | 2725.665 |
| 80          | -4.399                   | 0.510 | 418.123  | 962.936    | 0.255 | 0.601 | 653.663  |
| 100         | -4.793                   | 0.638 | 118.953  | 273.948    | 0.319 | 0.752 | 148.666  |
| 125         | -4.899                   | 0.813 | 57.179   | 131.684    | 0.407 | 0.958 | 56.093   |
| 150         | -5.077                   | 0.602 | 19.724   | 45.424     | 0.301 | 0.709 | 26.151   |
| 175         | -5.114                   | 0.568 | 8.713    | 20.065     | 0.284 | 0.668 | 12.248   |

Peak 3 (P3) - Bulk

| Temperature | X <sub>c</sub> of P3     | w     | Area    | Area*2.303 | Sigma | FWHM  | Height  |
|-------------|--------------------------|-------|---------|------------|-------|-------|---------|
| (°C)        | Log <sub>10</sub> (T)/ s |       |         |            |       |       |         |
| 22          | -4.695                   | 0.367 | 133.236 | 306.843    | 0.184 | 0.433 | 289.328 |
| 80          | -5.055                   | 0.390 | 32.996  | 75.989     | 0.195 | 0.459 | 67.504  |
| 100         | -5.127                   | 0.388 | 17.489  | 40.277     | 0.194 | 0.456 | 35.993  |
| 125         | -5.748                   | 0.453 | 9.664   | 22.257     | 0.227 | 0.534 | 17.014  |
| 150         | -5.740                   | 0.548 | 12.164  | 28.014     | 0.274 | 0.645 | 17.721  |
| 175         | -5.776                   | 0.579 | 10.075  | 23.204     | 0.290 | 0.682 | 13.878  |

Table S 22. Gauss deconvolution of DRT spectra for 6.33% H<sub>2</sub> in N<sub>2</sub>

Peak 1 (P1) – Electrode

| Temperature | X <sub>c</sub> of P1     | w     | Area   | Area*2.303 | Sigma | FWHM  | Height  | Total R2 Adjust for P1,P2, and P3 | Total R for P1 + P2 + P3 |
|-------------|--------------------------|-------|--------|------------|-------|-------|---------|-----------------------------------|--------------------------|
| (°C)        | Log <sub>10</sub> (T)/ s |       |        |            |       |       |         |                                   |                          |
| 22          | -2.736                   | 0.271 | 50.303 | 115.847    | 0.135 | 0.319 | 148.305 | 0.9971                            | 4301.7                   |
| 80          | -3.331                   | 0.312 | 17.621 | 40.581     | 0.156 | 0.367 | 45.070  | 0.9966                            | 1055.0                   |
| 100         | -3.900                   | 0.650 | 12.089 | 27.842     | 0.325 | 0.765 | 14.840  | 0.9988                            | 321.5                    |
| 125         | -4.073                   | 0.780 | 6.067  | 13.972     | 0.390 | 0.918 | 6.206   | 0.9996                            | 149.9                    |
| 150         | -4.214                   | 0.615 | 2.669  | 6.147      | 0.308 | 0.724 | 3.462   | 0.9996                            | 84.3                     |
| 175         | -4.154                   | 0.462 | 0.592  | 1.363      | 0.231 | 0.544 | 1.022   | 0.9997                            | 41.7                     |

Peak 2 (P2) – Grain Boundary

| Temperature | X <sub>c</sub> of P2     | w     | Area     | Area*2.303 | Sigma | FWHM  | Height   |
|-------------|--------------------------|-------|----------|------------|-------|-------|----------|
| (°C)        | Log <sub>10</sub> (T)/ s |       |          |            |       |       |          |
| 22          | -3.793                   | 0.503 | 1687.865 | 3887.153   | 0.251 | 0.592 | 2678.244 |
| 80          | -4.416                   | 0.519 | 409.996  | 944.221    | 0.260 | 0.612 | 629.737  |
| 100         | -4.820                   | 0.655 | 113.348  | 261.040    | 0.328 | 0.772 | 137.979  |
| 125         | -4.934                   | 0.756 | 48.065   | 110.695    | 0.378 | 0.890 | 50.748   |
| 150         | -5.069                   | 0.648 | 23.588   | 54.324     | 0.324 | 0.762 | 29.063   |
| 175         | -5.112                   | 0.547 | 7.535    | 17.352     | 0.273 | 0.644 | 10.997   |

Peak 3 (P3) - Bulk

| Temperature | X <sub>c</sub> of P3     | w     | Area    | Area*2.303 | Sigma | FWHM  | Height  |
|-------------|--------------------------|-------|---------|------------|-------|-------|---------|
| (°C)        | Log <sub>10</sub> (T)/ s |       |         |            |       |       |         |
| 22          | -4.709                   | 0.371 | 129.707 | 298.715    | 0.185 | 0.437 | 279.134 |
| 80          | -5.063                   | 0.410 | 30.460  | 70.150     | 0.205 | 0.483 | 59.277  |
| 100         | -5.117                   | 0.369 | 14.183  | 32.663     | 0.185 | 0.435 | 30.635  |
| 125         | -5.740                   | 0.484 | 10.960  | 25.242     | 0.242 | 0.569 | 18.083  |
| 150         | -5.751                   | 0.504 | 10.326  | 23.781     | 0.252 | 0.593 | 16.352  |
| 175         | -5.776                   | 0.593 | 9.985   | 22.995     | 0.297 | 0.699 | 13.428  |

Table S 23. Gauss deconvolution of DRT spectra for 7.97% H<sub>2</sub> in N<sub>2</sub>

Peak 1 (P1) – Electrode

| Temperature | X <sub>c</sub> of P1     | w     | Area   | Area*2.303 | Sigma | FWHM  | Height  | Total R2 Adjust for P1,P2, and P3 | Total R for P1 + P2 + P3 |
|-------------|--------------------------|-------|--------|------------|-------|-------|---------|-----------------------------------|--------------------------|
| (°C)        | Log <sub>10</sub> (T)/ s |       |        |            |       |       |         |                                   |                          |
| 22          | -2.749                   | 0.274 | 45.418 | 104.597    | 0.137 | 0.322 | 132.338 | 0.9970                            | 4265.8                   |
| 80          | -3.413                   | 0.267 | 14.126 | 32.533     | 0.134 | 0.315 | 42.146  | 0.9965                            | 1012.6                   |
| 100         | -3.930                   | 0.650 | 11.787 | 27.146     | 0.325 | 0.765 | 14.469  | 0.9995                            | 307.3                    |
| 125         | -4.089                   | 0.780 | 5.563  | 12.812     | 0.390 | 0.918 | 5.691   | 0.9997                            | 139.2                    |
| 150         | -4.386                   | 0.838 | 3.869  | 8.909      | 0.419 | 0.987 | 3.682   | 0.9998                            | 81.2                     |
| 175         | -4.158                   | 0.445 | 0.532  | 1.226      | 0.222 | 0.523 | 0.955   | 0.9998                            | 41.1                     |

Peak 2 (P2) – Grain Boundary

| Temperature | X <sub>c</sub> of P2     | w     | Area     | Area*2.303 | Sigma | FWHM  | Height   |
|-------------|--------------------------|-------|----------|------------|-------|-------|----------|
| (°C)        | Log <sub>10</sub> (T)/ s |       |          |            |       |       |          |
| 22          | -3.801                   | 0.496 | 1675.951 | 3859.714   | 0.248 | 0.584 | 2697.275 |
| 80          | -4.495                   | 0.497 | 397.584  | 915.636    | 0.248 | 0.585 | 638.753  |
| 100         | -4.817                   | 0.640 | 102.101  | 235.139    | 0.320 | 0.753 | 127.379  |
| 125         | -4.959                   | 0.750 | 44.324   | 102.078    | 0.375 | 0.883 | 47.140   |
| 150         | -5.074                   | 0.590 | 19.058   | 43.891     | 0.295 | 0.695 | 25.753   |
| 175         | -5.106                   | 0.534 | 6.844    | 15.763     | 0.267 | 0.629 | 10.219   |

Peak 3 (P3) - Bulk

| Temperature | X <sub>c</sub> of P3     | w     | Area    | Area*2.303 | Sigma | FWHM  | Height  |
|-------------|--------------------------|-------|---------|------------|-------|-------|---------|
| (°C)        | Log <sub>10</sub> (T)/ s |       |         |            |       |       |         |
| 22          | -4.709                   | 0.379 | 130.924 | 301.517    | 0.190 | 0.447 | 275.369 |
| 80          | -5.050                   | 0.420 | 27.990  | 64.462     | 0.210 | 0.495 | 53.174  |
| 100         | -5.121                   | 0.412 | 19.525  | 44.967     | 0.206 | 0.485 | 37.841  |
| 125         | -5.753                   | 0.477 | 10.551  | 24.298     | 0.238 | 0.562 | 17.652  |
| 150         | -5.739                   | 0.555 | 12.349  | 28.440     | 0.278 | 0.654 | 17.744  |
| 175         | -5.775                   | 0.620 | 10.484  | 24.144     | 0.310 | 0.730 | 13.483  |

Table S 24. Deconvolution of DRT spectra for 19.16% H<sub>2</sub> in N<sub>2</sub>

Peak 1 (P1) – Electrode

| Temperature | X <sub>c</sub> of P1     | w     | Area   | Area*2.303 | Sigma | FWHM  | Height  | Total R2 Adjust for P1,P2, and P3 | Total R for P1 + P2 + P3 |
|-------------|--------------------------|-------|--------|------------|-------|-------|---------|-----------------------------------|--------------------------|
| (°C)        | Log <sub>10</sub> (T)/ s |       |        |            |       |       |         |                                   |                          |
| 22          | -2.738                   | 0.260 | 46.518 | 107.131    | 0.130 | 0.307 | 142.559 | 0.9965                            | 4190.3                   |
| 80          | -3.400                   | 0.282 | 13.765 | 31.700     | 0.141 | 0.331 | 39.011  | 0.9966                            | 972.0                    |
| 100         | -3.977                   | 0.650 | 12.136 | 27.950     | 0.325 | 0.765 | 14.897  | 0.9992                            | 292.1                    |
| 125         | -4.126                   | 0.780 | 5.399  | 12.434     | 0.390 | 0.918 | 5.523   | 0.9997                            | 130.7                    |
| 150         | -4.381                   | 0.888 | 3.669  | 8.450      | 0.444 | 1.046 | 3.297   | 0.9995                            | 78.9                     |
| 175         | -4.152                   | 0.414 | 0.477  | 1.097      | 0.207 | 0.488 | 0.918   | 0.9999                            | 38.5                     |

Peak 2 (P2) – Grain Boundary

| Temperature | X <sub>c</sub> of P2     | w     | Area     | Area*2.303 | Sigma | FWHM  | Height   |
|-------------|--------------------------|-------|----------|------------|-------|-------|----------|
| (°C)        | Log <sub>10</sub> (T)/ s |       |          |            |       |       |          |
| 22          | -3.824                   | 0.490 | 1648.460 | 3796.404   | 0.245 | 0.576 | 2686.363 |
| 80          | -4.524                   | 0.508 | 387.353  | 892.073    | 0.254 | 0.599 | 607.945  |
| 100         | -4.831                   | 0.610 | 94.040   | 216.573    | 0.305 | 0.718 | 122.982  |
| 125         | -4.986                   | 0.722 | 40.565   | 93.420     | 0.361 | 0.851 | 44.802   |
| 150         | -5.072                   | 0.583 | 17.991   | 41.434     | 0.291 | 0.686 | 24.636   |
| 175         | -5.127                   | 0.538 | 6.607    | 15.216     | 0.269 | 0.633 | 9.800    |

Peak 3 (P3) - Bulk

| Temperature | X <sub>c</sub> of P3     | w     | Area    | Area*2.303 | Sigma | FWHM  | Height  |
|-------------|--------------------------|-------|---------|------------|-------|-------|---------|
| (°C)        | Log <sub>10</sub> (T)/ s |       |         |            |       |       |         |
| 22          | -4.730                   | 0.364 | 124.531 | 286.795    | 0.182 | 0.428 | 273.251 |
| 80          | -5.070                   | 0.410 | 20.938  | 48.220     | 0.205 | 0.483 | 40.746  |
| 100         | -5.124                   | 0.402 | 20.664  | 47.589     | 0.201 | 0.473 | 41.045  |
| 125         | -5.754                   | 0.486 | 10.799  | 24.871     | 0.243 | 0.572 | 17.727  |
| 150         | -5.721                   | 0.561 | 12.580  | 28.972     | 0.280 | 0.660 | 17.895  |
| 175         | -5.789                   | 0.589 | 9.627   | 22.172     | 0.294 | 0.693 | 13.048  |

a)

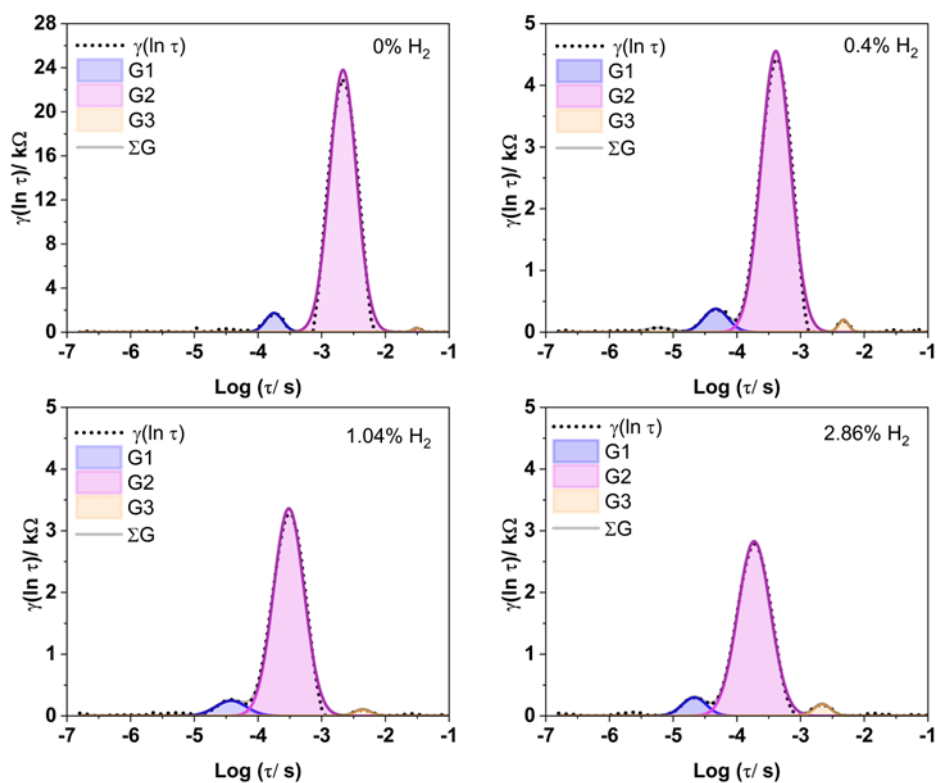

b)

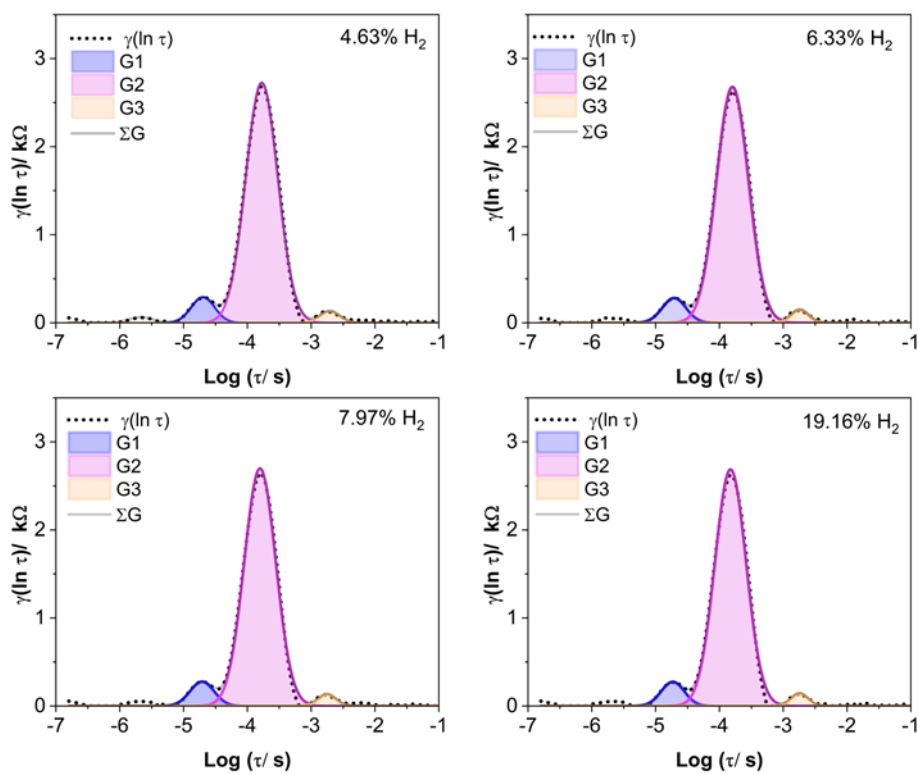

Figure S 37. Gauss deconvolution of DRT spectra for impedance measurements at 22 °C for gall H<sub>2</sub> + N<sub>2</sub> mixtures studied.

a)

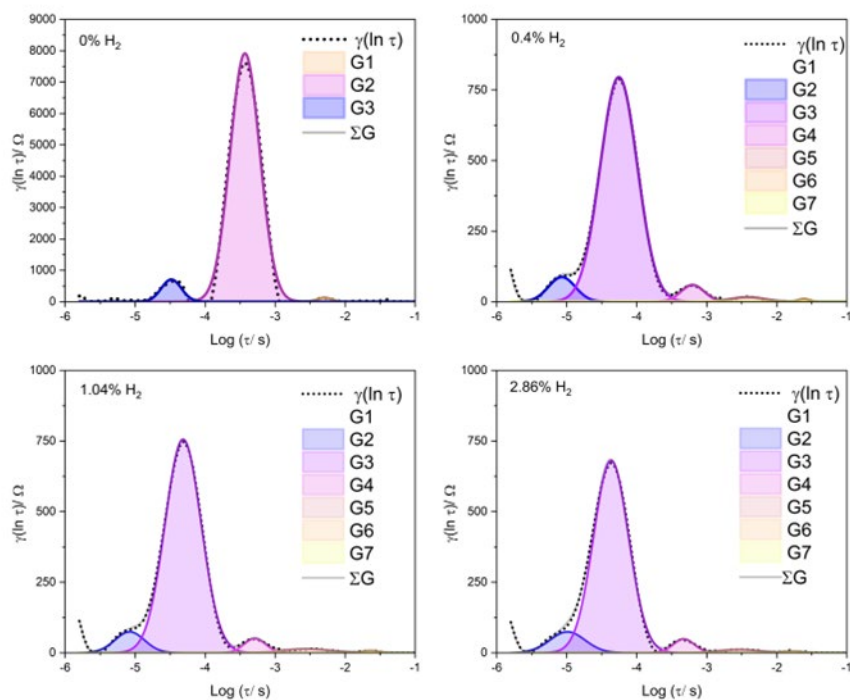

b)

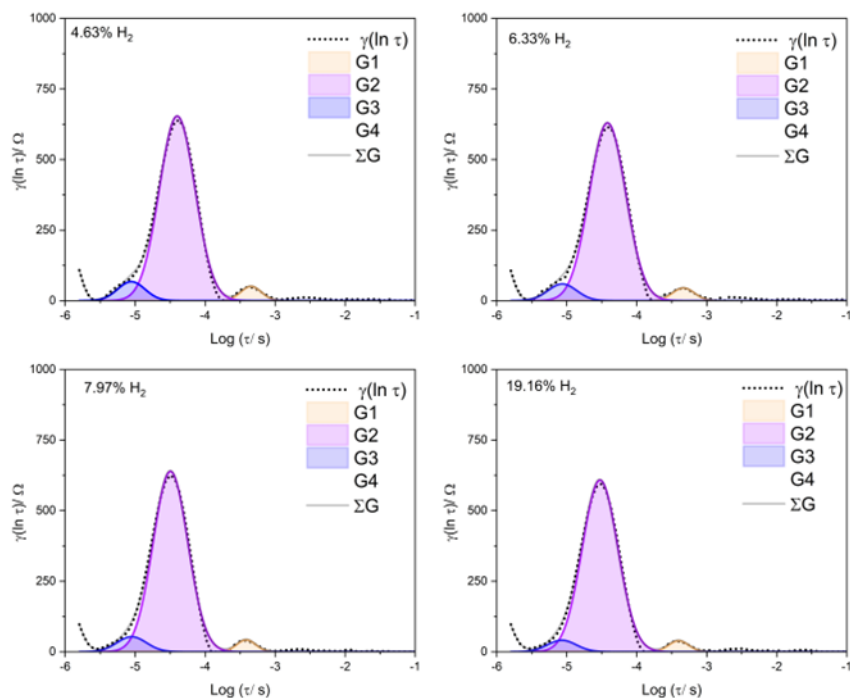

Figure S 38. Gauss deconvolution of DRT spectra for impedance measurements at 80 °C for all H<sub>2</sub> + N<sub>2</sub> mixtures studied.



a)

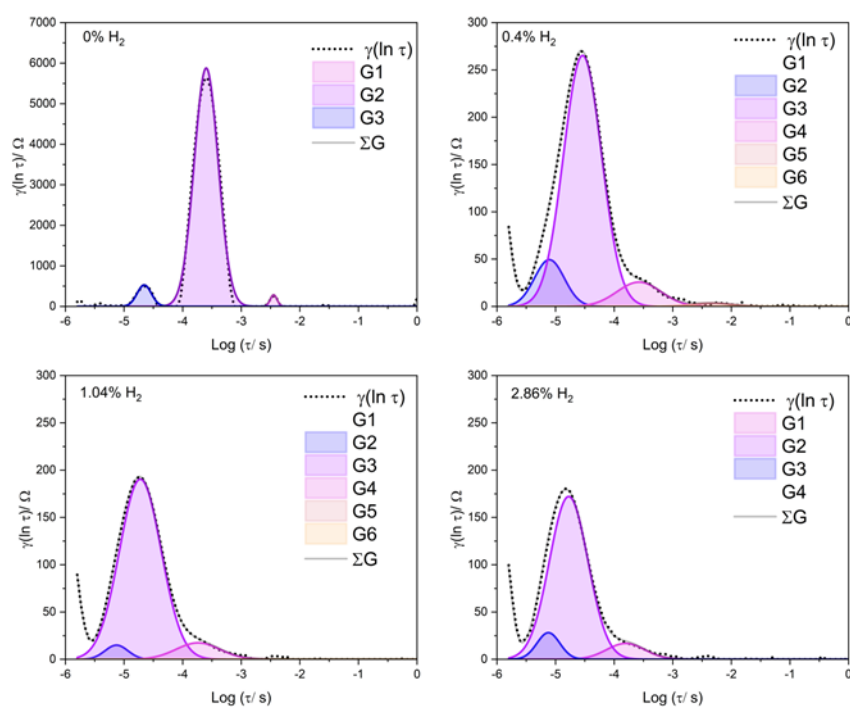

b)

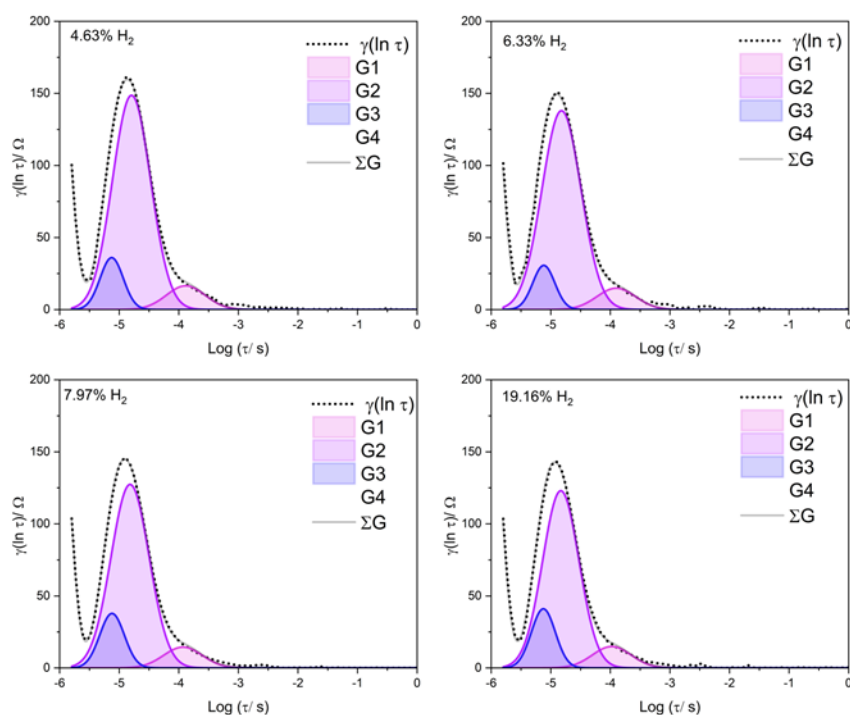

Figure S 39. Gauss deconvolution of DRT spectra for impedance measurements at 100 °C for all H<sub>2</sub> + N<sub>2</sub> mixtures studied.

a)

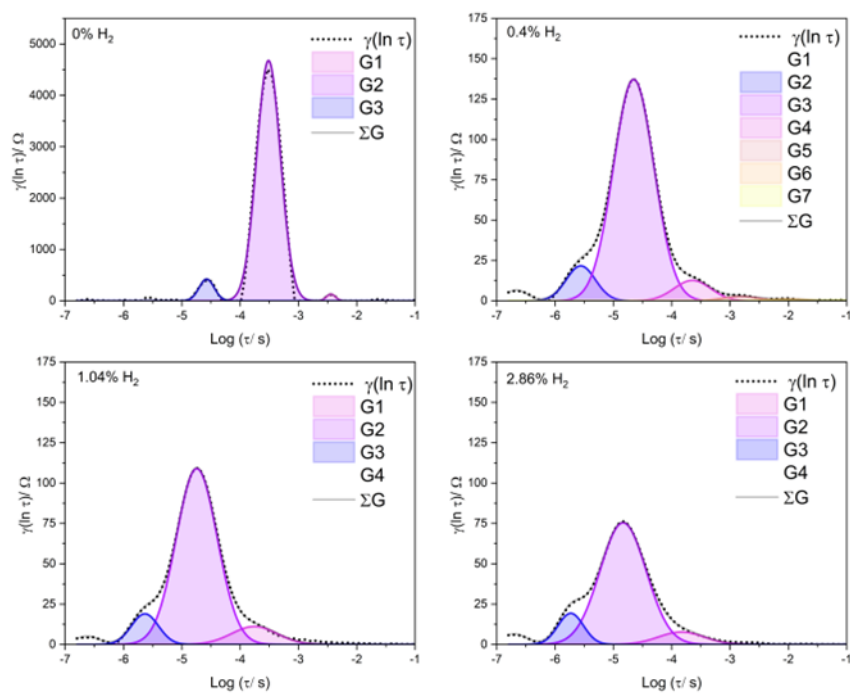

b)

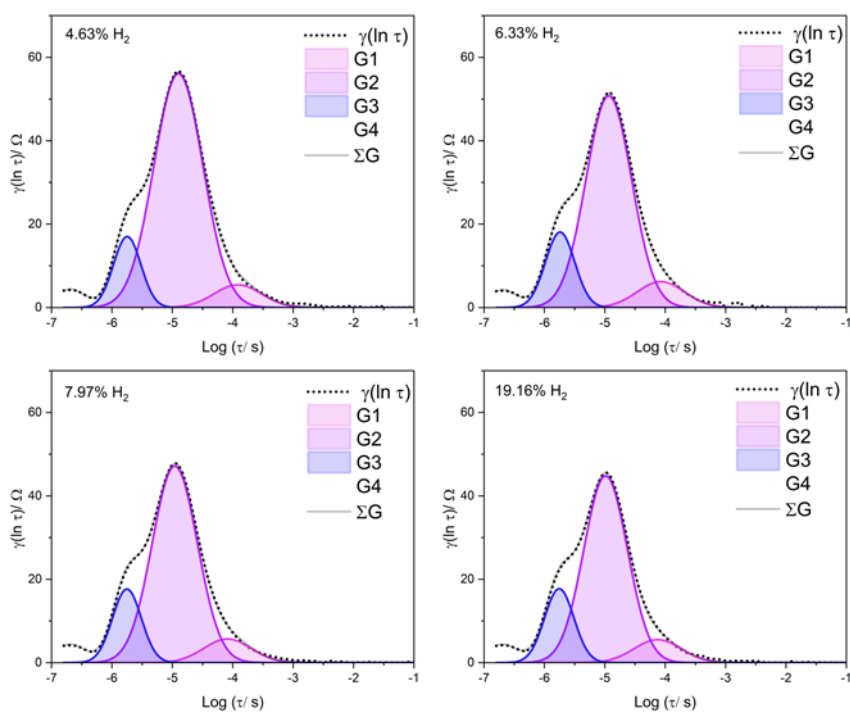

Figure S 40. Gauss deconvolution of DRT spectra for impedance measurements at 125 °C for all H<sub>2</sub> + N<sub>2</sub> mixtures studied.

a)

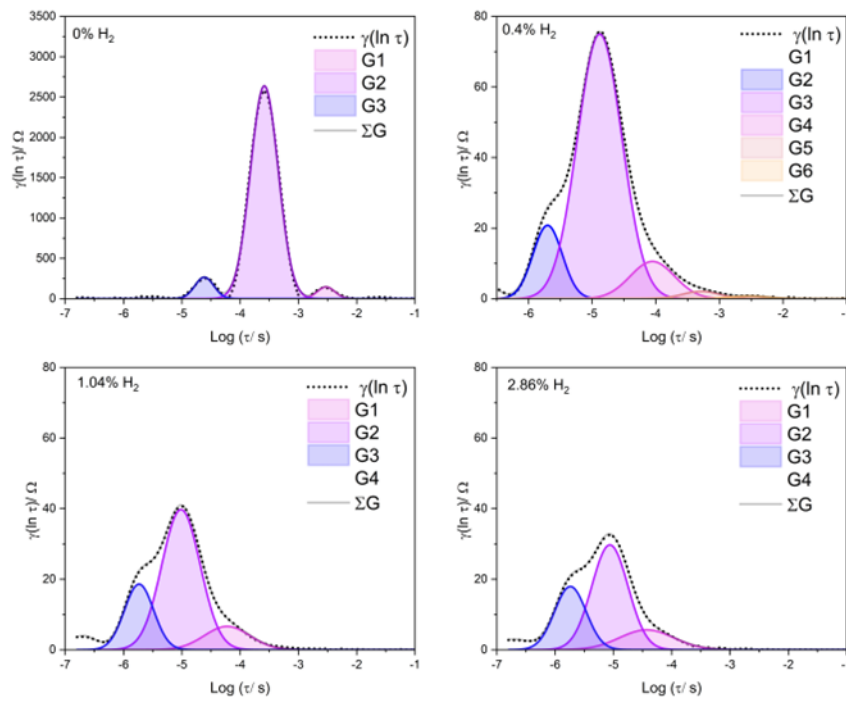

b)

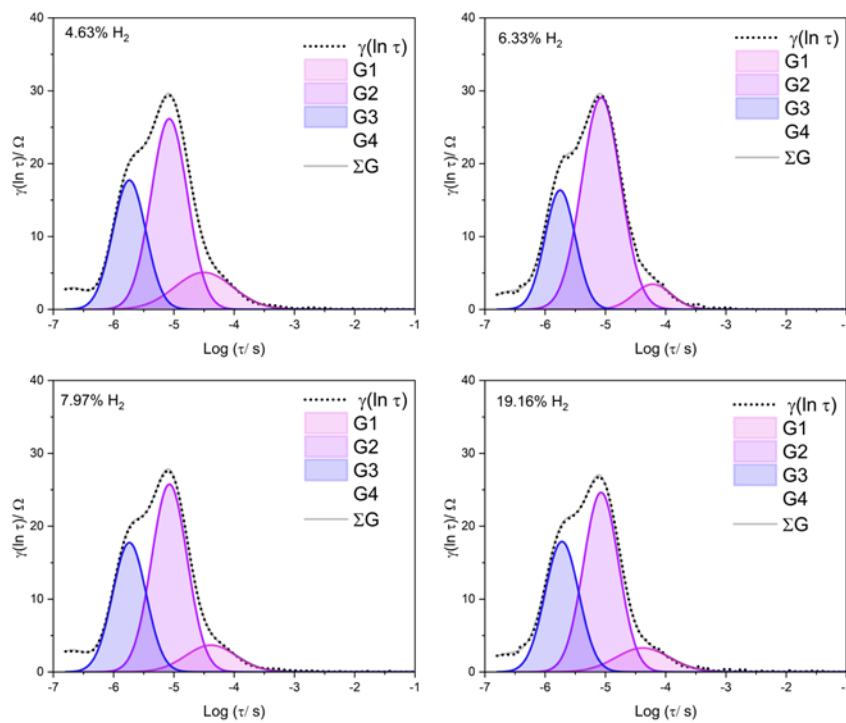

Figure S 41. Gauss deconvolution of DRT spectra for impedance measurements at 150 °C for all H<sub>2</sub> + N<sub>2</sub> mixtures studied.

a)

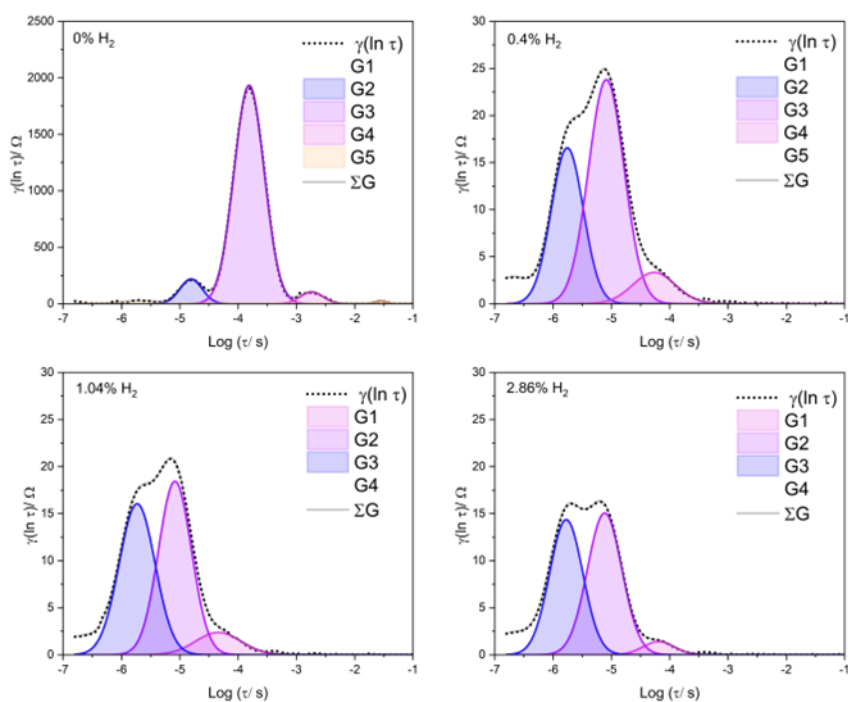

b)

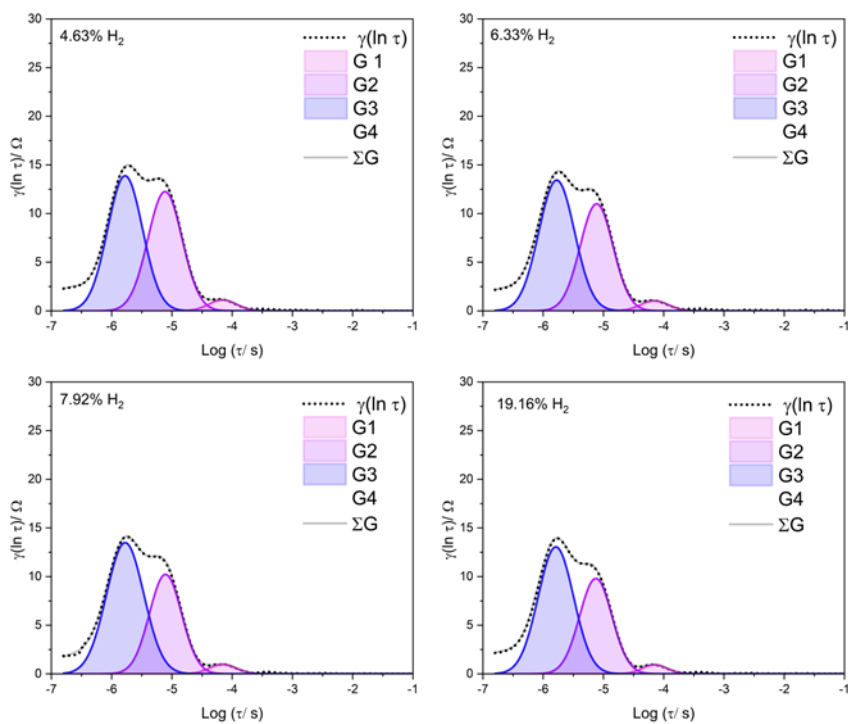

Figure S 42. Gauss deconvolution of DRT spectra for impedance measurements at 175 °C for all H<sub>2</sub> + N<sub>2</sub> mixtures studied.

### 2.8.7 Activation Energies from Jonscher Analysis using $\sigma_{dc}$ Data

Table S 25. Activation energies for Pt-BTO-470 as a function of H<sub>2</sub> concentration. Values derived from three temperature-dependent linear regions of DC conductivity vs. 1/ T obtained from Jonscher analysis of impedance spectra.

| H <sub>2</sub> Concentration (%) | Activation Energy (eV) |                                 |                         |
|----------------------------------|------------------------|---------------------------------|-------------------------|
|                                  | T <sup>a</sup> < 80 °C | 80 °C < T <sup>b</sup> < 100 °C | T <sup>c</sup> > 100 °C |
| 0                                | 0.17                   |                                 |                         |
| 0.4                              | 0.23                   | 0.43                            | 0.37 ± 0.10             |
| 1.04                             | 0.21                   | 0.57                            | 0.36 ± 0.06             |
| 2.86                             | 0.21                   | 0.56                            | 0.37 ± 0.03             |
| 4.63                             | 0.21                   | 0.59                            | 0.36 ± 0.03             |
| 6.33                             | 0.21                   | 0.61                            | 0.36 ± 0.04             |
| 7.91                             | 0.22                   | 0.61                            | 0.35 ± 0.05             |
| 19.16                            | 0.22                   | 0.62                            | 0.35 ± 0.06             |

a = 2 points, b = 2 points, c = 4 points used in the Arrhenius plot

a)

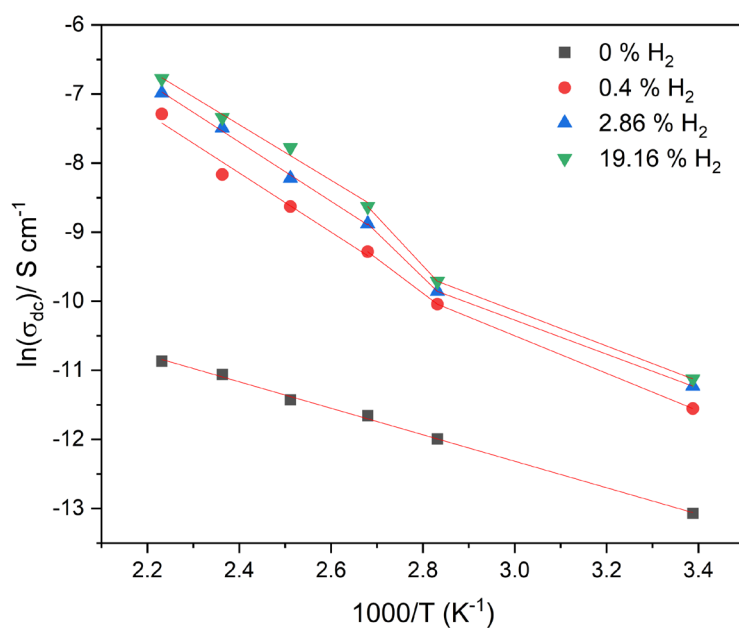

b)

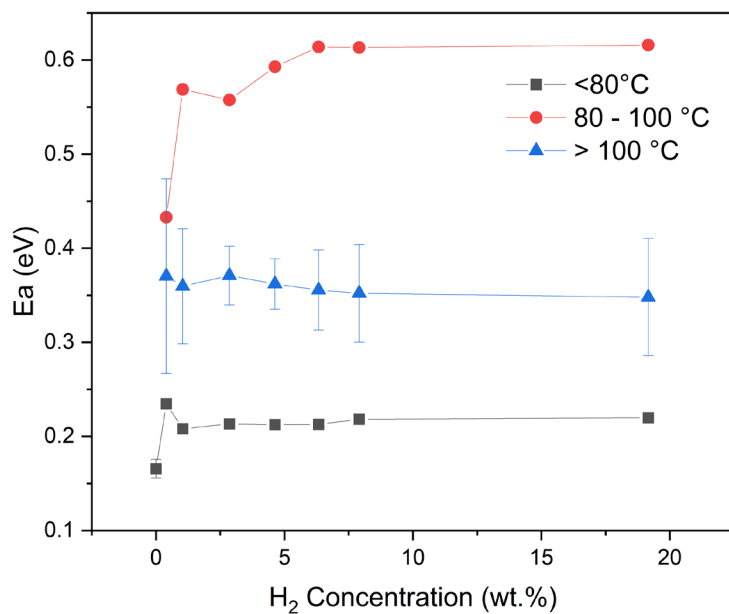

Figure S 43. (a) Arrhenius plot of DC conductivities ( $\sigma_{dc}$ ) derived from the Jonscher model vs.  $1/T$  for mixtures of  $H_2 + N_2$  at 0%, 0.4%, 2.9%, and 19%  $H_2$ , and showing three temperature dependent linear regions. (b) Activation energies for electron transport derived from three linear regions in the Arrhenius plots corresponding to  $T < 80$  °C,  $T = 80 - 100$  °C, and  $T > 100$  °C.

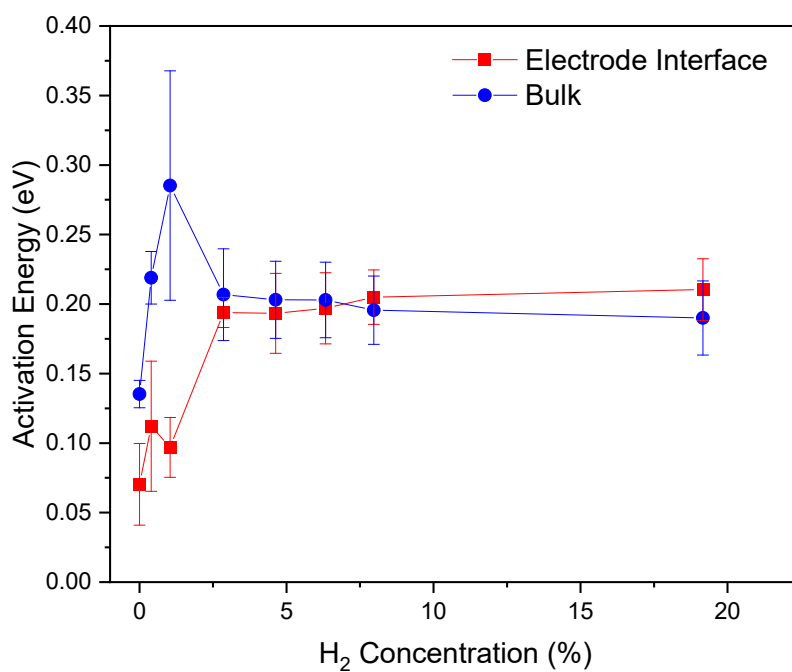

Figure S 44. Activation energy (eV) vs. H<sub>2</sub> concentration (%) for bulk and electrode interface regions.

## 2.8.8 Meyer-Neldel Effect for Total Conductivity from Jonscher $\sigma_{dc}$ Data

a)

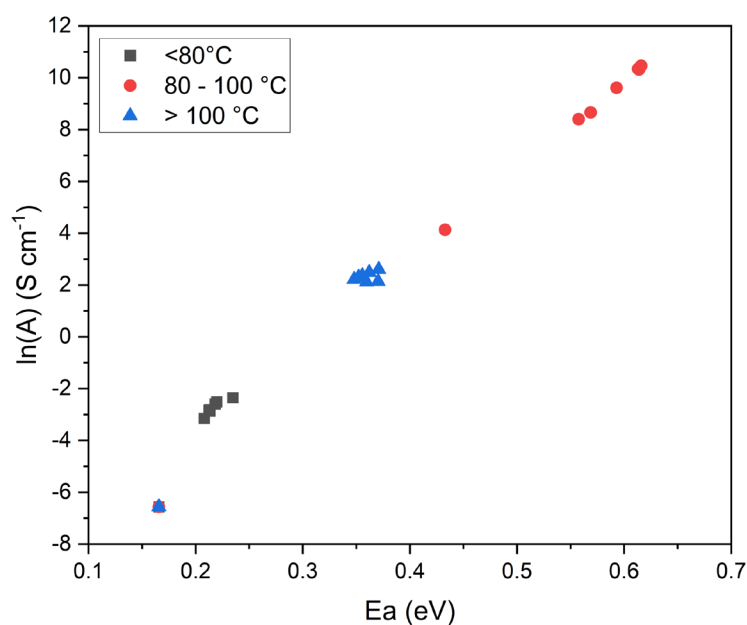

b)

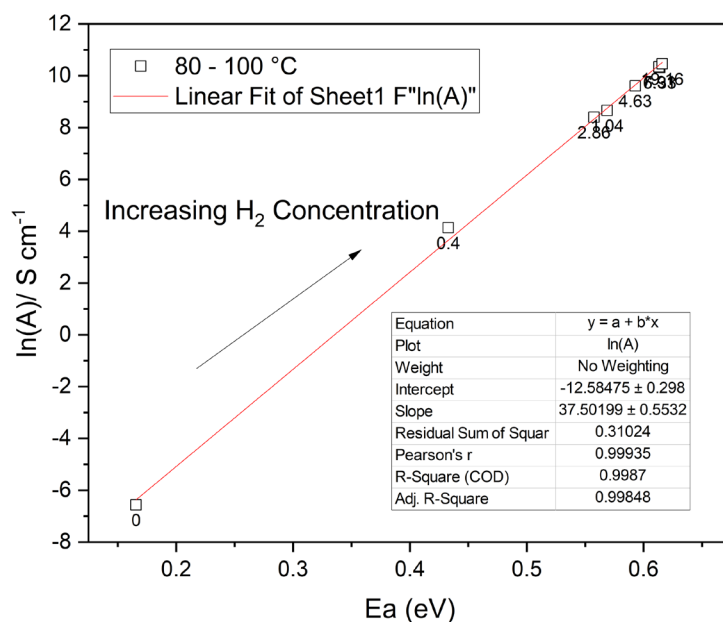

Figure S 45. (a)  $\ln(A)$  vs.  $E_a$  plots for the three linear regions identified in the Arrhenius plots  $T < 80^\circ C$  (black),  $T = 80 - 100^\circ C$  (red), and  $T > 100^\circ C$  (blue). (b)  $\ln(A)$  vs.  $\ln(E_a)$  plots for the temperature region  $80 - 100^\circ C$  showing a progressive linear increase in  $\ln(A)$  and  $E_a$  with increasing  $H_2$  concentration (with  $H_2$  concentrations next to symbols).



## 2.8.9 Grain Boundary Activation Energies from DRT Analysis

Table S 26. Activation energies for Pt-BTO-470 as a function of H<sub>2</sub> concentration for the Pt-BTO-470 grain boundary region. Values derived from three temperature-dependent linear regions of R<sub>gb</sub> vs. 1/T obtained from Gauss deconvolution of DRT analysis of impedance spectra.

| H <sub>2</sub> Concentration (%) | Activation Energy (eV) |                                 |                         |
|----------------------------------|------------------------|---------------------------------|-------------------------|
|                                  | T <sup>a</sup> < 80 °C | 80 °C < T <sup>b</sup> < 100 °C | T <sup>c</sup> > 100 °C |
| 0                                | 0.17                   |                                 |                         |
| 0.4                              | 0.25                   | 0.51                            | 0.46 ± 0.09             |
| 1.04                             | 0.22                   | 0.60                            | 0.50 ± 0.06             |
| 2.86                             | 0.22                   | 0.64                            | 0.51 ± 0.05             |
| 4.63                             | 0.22                   | 0.72                            | 0.51 ± 0.04             |
| 6.33                             | 0.22                   | 0.73                            | 0.51 ± 0.05             |
| 7.91                             | 0.22                   | 0.77                            | 0.52 ± 0.04             |
| 19.16                            | 0.23                   | 0.81                            | 0.51 ± 0.04             |

a = 2 points, b = 2 points, c = 4 points used in the Arrhenius plot

## 2.8.10 Meyer-Neldel Effect for Grain Boundary Regions from Distribution of Relaxation Times Analysis

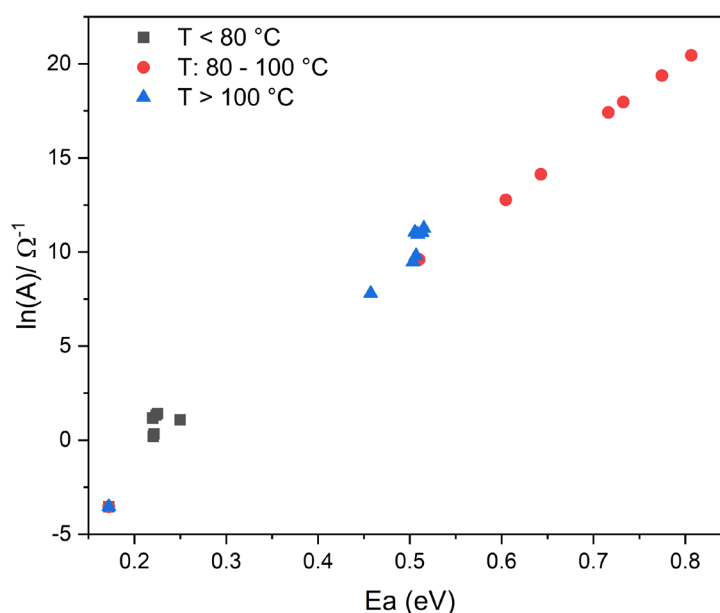

Figure S 46. Plot showing the correlation between ln(A) vs. Ea for the grain boundary region for the temperature ranges T < 80 °C, T = 80 – 100 °C, and T > 100 °C, and the progressive linear increase as the H<sub>2</sub> concentration is increased.

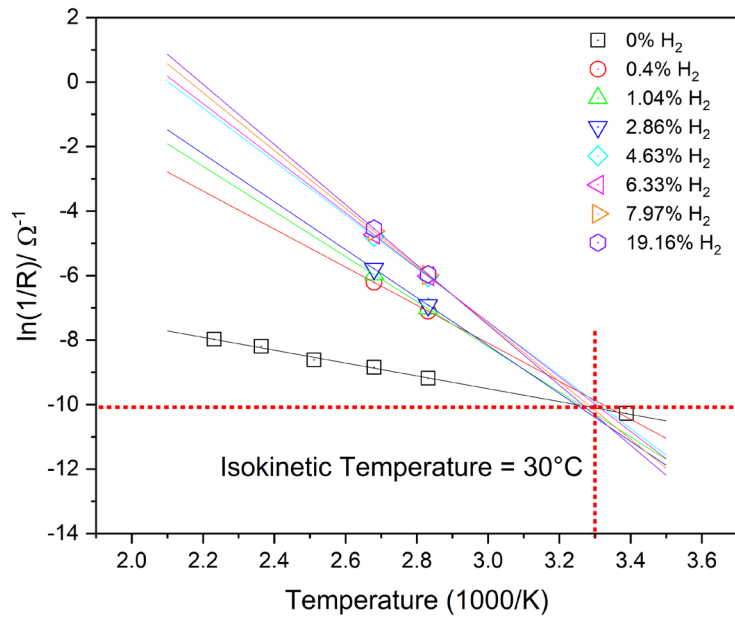

Figure S 47. Arrhenius plots of  $\ln(1/R_{gb})$  vs.  $1000/T$  for the Pt-BTO-470 grain boundary region and for  $H_2$  concentrations from 0% to 19%. The appearance of an isokinetic temperature over the temperature range  $T = 80 - 100$  °C occurs at 30 °C.

### 3 References

1. Singh, B.; Hesse, R.; Linford, M., Good Practices for XPS (and other Types of) Peak Fitting. Use Chi Squared, Use the Abbe Criterion, Show the Sum of Fit Components, Show the (Normalized) Residuals, Choose an Appropriate Background, Estimate Fit Parameter Uncertainties, Limit the Number of Fit Parameters, Use Information from Other Techniques, and Use Common Sense. *Vacuum Technology & Coating* **2015**.
2. Miot, C.; Husson, E.; Proust, C.; Erre, R.; Coutures, J. P., X-ray photoelectron spectroscopy characterization of barium titanate ceramics prepared by the citric route. Residual carbon study. *Journal of Materials Research* **1997**, *12* (9), 2388-2392.
3. Nishimoto, A.; Nishi, C., Carbide layer coating on titanium by spark plasma sintering technique. *Surface and Coatings Technology* **2018**, *353*, 324-328.
4. Zhang, L.; Koka, R. V., A study on the oxidation and carbon diffusion of TiC in alumina–titanium carbide ceramics using XPS and Raman spectroscopy. *Mater Chem Phys* **1998**, *57* (1), 23-32.
5. Moulder, J. F.; Chastain, J., *Handbook of X-ray Photoelectron Spectroscopy: A Reference Book of Standard Spectra for Identification and Interpretation of XPS Data*. Physical Electronics Division, Perkin-Elmer Corporation: 1992.
